# Supplementary material for: A web-based GIS (web-GIS) database of the scientific articles on earthquake-triggered landslides
Source: Copernicus journal article supplement (doi:10.5194/nhess-23-1789-2023), 2023-05-12
Supplement: Supplementary file 1 [file article database.xlsx]

## Sheet: Article database
Link paper	ID	Publication year	Author(s)	Title	Journal	Main topic	Sub-topic	Earthquake ID	Earthquake name	Earthquake time	Earthquake country
	A1	B1	B2	B3	B4	C1	C2	D1	D2	D3	D4
https://www.doi.org/10.1016/j.geomorph.2018.10.022	1	2019	Tanyas, Hakan; Rossi, Mauro; Alvioli, Massimiliano; van Westen, Cees J.; Marchesini, Ivan	A global slope unit-based method for the near real-time prediction of earthquake-induced landslides	Geomorphology	regional landslide analysis	regional landslide comparison	Not Applicable	Not Applicable	Not Applicable	Not Applicable
https://www.doi.org/10.1016/j.enggeo.2017.07.007	2	2017	Lv, Qingchao; Liu, Yaoru; Yang, Qiang	Stability analysis of earthquake-induced rock slope based on back analysis of shear strength parameters of rock mass	Engineering Geology	single landslide analysis	single failure modelling	chin_5	Wenping (Ludian county)	2014-08-03 08:30:13UTC	China
https://www.doi.org/10.1016/j.geomorph.2017.01.030	3	2018	Roback, Kevin; Clark, Marin K.; West, A. Joshua; Zekkos, Dimitrios; Li, Gen; Gallen, Sean F.; Chamlagain, Deepak; Godt, Jonathan W.	The size, distribution, and mobility of landslides caused by the 2015 Mw7.8 Gorkha earthquake, Nepal	Geomorphology	regional landslide analysis	regional mapping|regional landslide descriptive statistics	nep_1	Gorkha	2015-04-25 06:11:25UTC	Nepal
https://www.doi.org/10.1007/978-3-319-53498-5_2	4	2017	Tiwari, Binod; Ajmera, Beena	Landslides Triggered by Earthquakes from 1920 to 2015	Advancing Culture of Living with Landslides	other|regional landslide analysis	regional landslide comparison	Not Applicable	Not Applicable	Not Applicable	Not Applicable
https://www.doi.org/10.1016/S0013-7952(00)00044-2	5	2000	Prestininzi, Alberto; Romeo, Roberto	Earthquake-induced ground failures in Italy	Engineering Geology	regional landslide analysis	regional landslide comparison	Not Applicable	Not Applicable	Not Applicable	Not Applicable
https://www.doi.org/10.1016/S0013-7952(00)00042-9	6	2000	Romeo, Roberto	Seismically induced landslide displacements: a predictive model	Engineering Geology	single landslide analysis	single failure modelling	ita_1	Irpinia	1980-11-23 18:34:53UTC	Italy
https://www.doi.org/10.2113/8.4.261	7	2002	Santi, P. M.	Preliminary Evaluation of Seismic Hazards for Emergency Rescue Route, U.S. 60, Missouri	Environmental and Engineering Geoscience	regional landslide analysis|single landslide analysis	single failure impact/risk modelling|regional risk modelling	Not Applicable	Not Applicable	Not Applicable	Not Applicable
https://www.doi.org/10.1785/0120020016	8	2003	Del Gaudio, V.	An Approach to Time-Probabilistic Evaluation of Seismically Induced Landslide Hazard	Bulletin of the Seismological Society of America	regional landslide analysis	regional susceptibility/hazard assessment	Not Applicable	Not Applicable	Not Applicable	Not Applicable
https://www.doi.org/10.1016/j.soildyn.2004.06.019	9	2004	Del Gaudio, V.; Wasowski, J.	Time probabilistic evaluation of seismically induced landslide hazard in Irpinia (Southern Italy)	Soil Dynamics and Earthquake Engineering	regional landslide analysis	regional susceptibility/hazard assessment	ita_1	Irpinia	1980-11-23 18:34:53UTC	Italy
https://www.doi.org/10.1139/t05-032	10	2005	Azizian, A; Popescu, R	Finite element simulation of seismically induced retrogressive failure of submarine slopes	Canadian Geotechnical Journal	single landslide analysis	single failure modelling	Not Applicable	Not Applicable	Not Applicable	Not Applicable
https://www.doi.org/10.1007/s11069-010-9580-z	11	2011	Katz, O.; Reichenbach, P.; Guzzetti, F.	Rock fall hazard along the railway corridor to Jerusalem, Israel, in the Soreq and Refaim valleys	Natural Hazards	regional landslide analysis	regional susceptibility/hazard assessment| regional risk modelling	Not Applicable	Not Applicable	Not Applicable	Not Applicable
https://www.doi.org/10.1016/j.enggeo.2011.08.002	12	2011	Delgado, J.; Garrido, J.; López-Casado, C.; Martino, S.; Peláez, J.A.	On far field occurrence of seismically induced landslides	Engineering Geology	regional landslide analysis	regional landslide comparison	Not Applicable	Not Applicable	Not Applicable	Not Applicable
https://www.doi.org/10.1007/s11069-011-9886-5	13	2012	Del Gaudio, V.; Pierri, P.; Calcagnile, G.	Analysis of seismic hazard in landslide-prone regions: criteria and example for an area of Daunia (southern Italy)	Natural Hazards	regional landslide analysis	regional susceptibility/hazard assessment	Not Applicable	Not Applicable	Not Applicable	Not Applicable
https://www.doi.org/10.1016/j.geomorph.2013.07.024	14	2014	Chung, Jae-won; Rogers, J. David; Watkins, Conor M.	Estimating severity of seismically induced landslides and lateral spreads using threshold water levels	Geomorphology	regional landslide analysis	regional susceptibility/hazard assessment	Not Applicable	Not Applicable	Not Applicable	Not Applicable
https://www.doi.org/10.1016/j.enggeo.2018.10.008	15	2018	Del Gaudio, Vincenzo; Luo, Yonghong; Wang, Yunsheng; Wasowski, Janusz	Using ambient noise to characterise seismic slope response: The case of Qiaozhuang peri-urban hillslopes (Sichuan, China)	Engineering Geology	regional landslide analysis	regional susceptibility/hazard assessment	chin_1	Wenchuan-Sichuan	2008-05-12 06:28:01UTC	China
https://www.doi.org/10.1007/s10064-017-1087-3	16	2019	Salinas-Jasso, Jorge A.; Ramos-Zuñiga, Luis G.; Montalvo-Arrieta, Juan C.	Regional landslide hazard assessment from seismically induced displacements in Monterrey Metropolitan area, Northeastern Mexico	Bulletin of Engineering Geology and the Environment	regional landslide analysis	regional susceptibility/hazard assessment	Not Applicable	Not Applicable	Not Applicable	Not Applicable
https://www.doi.org/10.1016/j.enggeo.2019.105197	17	2019	Del Gaudio, Vincenzo; Zhao, Bo; Luo, Yonghong; Wang, Yunsheng; Wasowski, Janusz	Seismic response of steep slopes inferred from ambient noise and accelerometer recordings: the case of Dadu River valley, China	Engineering Geology	single landslide analysis	single landslide comparison	chin_1	Wenchuan-Sichuan	2008-05-12 06:28:01UTC	China
https://www.doi.org/10.1016/j.soildyn.2019.105811	18	2019	Mathews, Nicolas; Leshchinsky, Ben A.; Olsen, Michael J.; Klar, Assaf	Spatial distribution of yield accelerations and permanent displacements: A diagnostic tool for assessing seismic slope stability	Soil Dynamics and Earthquake Engineering	single landslide analysis	single failure modelling	Not Applicable	Not Applicable	Not Applicable	Not Applicable
https://www.doi.org/10.3390/su12124977	19	2020	Konovalov, Alexey; Gensiorovskiy, Yuriy; Stepnov, Andrey	Hazard-Consistent Earthquake Scenario Selection for Seismic Slope Stability Assessment	Sustainability	regional landslide analysis	regional susceptibility/hazard assessment	Not Applicable	Not Applicable	Not Applicable	Not Applicable
https://www.doi.org/10.1016/j.dib.2020.105940	20	2020	Rodríguez-Peces, Martín J.; Román-Herrera, José C.; Peláez, José A.; Delgado, José; Tsige, Meaza; Martino, Salvatore; Garrido, Jesús	Unbiased logic-tree data for earthquake-induced landslide hazard maps for low-to-moderate magnitude events	Data in Brief	other|regional landslide analysis		spa_1	Murcia	2011-05-11 16:47:25UTC	Spain
https://www.doi.org/https://bgo.ogs.it/pdf/bgta49.2_BOZZANO.pdf	21	2008	Bozzano, Francesca; Cardarelli, Ettore; Cercato, Michele; Lenti, Luca; Martino, Salvatore; Paciello, Antonella; Scarascia Mugnozza, Gabriele	Engineering-geology model of the seismically-induced Cerda landslide (Sicily, Italy)	Bollettino di Geofisica Teorica e Applicata	single landslide analysis	single failure mapping|single failure geotechnical characterization|single failure geophysical characterization	ita_3	offshore Sicily	2002-09-06 01:21:28UTC	Italy
https://www.doi.org/10.1016/j.enggeo.2020.105743	22	2020	Rodríguez-Peces, M.J.; Román-Herrera, J.C.; Peláez, J.A.; Delgado, J.; Tsige, M.; Missori, C.; Martino, S.; Garrido, J.	Obtaining suitable logic-tree weights for probabilistic earthquake-induced landslide hazard analyses	Engineering Geology	regional landslide analysis	regional susceptibility/hazard assessment	spa_1	Murcia	2011-05-11 16:47:25UTC	Spain
https://www.doi.org/10.1007/s10346-020-01512-5	23	2020	Xu, Yueren; Liu-Zeng, Jing; Allen, Mark B.; Zhang, Weiheng; Du, Peng	Landslides of the 1920 Haiyuan earthquake, northern China	Landslides	regional landslide analysis	regional mapping|regional risk modelling	chin_4	Haiyuan	1920-12-16 12:05:55UTC	China
https://www.doi.org/10.1007/s11629-019-5775-2	24	2020	Liu, Bo; Hu, Xie-wen; He, Kun; He, Shu-heng; Shi, Hong-bin; Liu, Ding-yi	The starting mechanism and movement process of the coseismic rockslide: A case study of the Laoyingyan rockslide induced by the “5.12” Wenchuan earthquake	Journal of Mountain Science	single landslide analysis	single failure mapping|single failure geotechnical characterization|single failure modelling	chin_1	Wenchuan-Sichuan	2008-05-12 06:28:01UTC	China
https://www.doi.org/10.5194/nhess-12-3631-2012	25	2012	Alfaro, P.; Delgado, J.; García-Tortosa, F. J.; Giner, J. J.; Lenti, L.; López-Casado, C.; Martino, S.; Scarascia Mugnozza, G.	The role of near-field interaction between seismic waves and slope on the triggering of a rockslide at Lorca (SE Spain)	Natural Hazards and Earth System Sciences	single landslide analysis	single failure mapping|single failure geotechnical characterization|single failure geophysical characterization|single failure modelling	spa_1	Murcia	2011-05-11 16:47:25UTC	Spain
https://www.doi.org/10.1785/0120110127	26	2011	Moore, Jeffrey R.; Gischig, Valentin; Burjanek, Jan; Loew, Simon; Fäh, Donat	Site Effects in Unstable Rock Slopes: Dynamic Behavior of the Randa Instability (Switzerland)Short Note	Bulletin of the Seismological Society of America	Not Applicable	Not Applicable	Not Applicable	Not Applicable	Not Applicable	Not Applicable
https://www.doi.org/10.1007/s10064-016-0914-2	27	2017	Deng, Qinghai; Gong, Linxian; Zhang, Liping; Yuan, Renmao; Xue, Yongqiang; Geng, Xuke; Hu, Shanxiang	Simulating dynamic processes and hypermobility mechanisms of the Wenjiagou rock avalanche triggered by the 2008 Wenchuan earthquake using discrete element modelling	Bulletin of Engineering Geology and the Environment	single landslide analysis	single failure mapping|single failure geotechnical characterization|single failure modelling	chin_1	Wenchuan-Sichuan	2008-05-12 06:28:01UTC	China
https://www.doi.org/10.1007/s10518-018-0350-8	28	2019	Lanzo, G.; Tommasi, P.; Ausilio, E.; Aversa, S.; Bozzoni, F.; Cairo, R.; d’Onofrio, A.; Durante, M. G.; Foti, S.; Giallini, S.; Mucciacciaro, M.; Pagliaroli, A.; Sica, S.; Silvestri, F.; Vessia, G.; Zimmaro, P.	Reconnaissance of geotechnical aspects of the 2016 Central Italy earthquakes	Bulletin of Earthquake Engineering	regional landslide analysis|single landslide analysis	regional mapping|single failure mapping|single failure geotechnical characterization|single failure impact/risk modelling	ita_4|ita_5|ita_6	Amatrice|Castelsantangelo sul nera|Norcia	2016-08-24 01:36:32UTC|2016-10-26 19:18:08UTC|2016-10-30 06:40:18UTC	Italy|Italy|Italy
https://www.doi.org/10.1007/s10950-008-9146-7	29	2009	Aydan, Ömer; Ohta, Yoshimi; Hamada, Masanori	Geotechnical evaluation of slope and ground failures during the 8 October 2005 Muzaffarabad earthquake, Pakistan	Journal of Seismology	regional landslide analysis|single landslide analysis	regional landslide descriptive statistics|single failure modelling|single failure geotechnical characterization	pak_1	Kashmir	2005-10-08 03:50:40UTC	Pakistan
https://pubs.geoscienceworld.org/gsa/gsabulletin/article-abstract/95/4/406/202914/Landslides-caused-by-earthquakes?redirectedFrom=PDF	30	1984	Keefer, David K.	Landslides caused by earthquakes	GSA Bulletin	other|regional landslide analysis	regional landslide comparison	Not Applicable	Not Applicable	Not Applicable	Not Applicable
https://www.doi.org/10.1023/A:1021274710840	31	2002	Keefer, David K.	Investigating Landslides Caused by Earthquakes – A Historical Review	Surveys in Geophysics	other		Not Applicable	Not Applicable	Not Applicable	Not Applicable
https://www.doi.org/10.1016/j.compgeo.2010.03.007	32	2010	Wu, Jian-Hong	Seismic landslide simulations in discontinuous deformation analysis	Computers and Geotechnics	single landslide analysis	single failure modelling	taiw_1	Chi Chi	1999-09-20 17:47:18UTC	Taiwan
https://www.doi.org/10.1016/0169-555X(94)00060-5	33	1995	Tibaldi, Alessandro; Ferrari, Luca; Pasquarè, Giorgio	Landslides triggered by earthquakes and their relations with faults and mountain slope geometry: an example from Ecuador	Geomorphology	regional landslide analysis	regional mapping	ecu_1|ecu_2	Colombia-Ecuador border region 1|Colombia-Ecuador border region 2	1987-03-06 01:54:50UTC|1987-03-06 04:10:41UTC	Ecuador|Ecuador
https://www.doi.org/10.1016/j.enggeo.2009.08.004	34	2009	Saygili, Gokhan; Rathje, Ellen M.	Probabilistically based seismic landslide hazard maps: An application in Southern California	Engineering Geology	regional landslide analysis	regional mapping|regional susceptibility/hazard assessment	Not Applicable	Not Applicable	Not Applicable	Not Applicable
https://www.doi.org/10.1016/S0013-7952(00)00038-7	35	2000	Parise, Mario; Jibson, Randall W.	A seismic landslide susceptibility rating of geologic units based on analysis of characteristics of landslides triggered by the 17 January, 1994 Northridge, California earthquake	Engineering Geology	regional landslide analysis	regional landslide descriptive statistics	usa_4	Northridge	1994-01-17 12:30:55UTC	USA
https://www.doi.org/10.1007/s10518-019-00589-1	36	2020	Martino, S.; Battaglia, S.; D’Alessandro, F.; Della Seta, M.; Esposito, C.; Martini, G.; Pallone, F.; Troiani, F.	Earthquake-induced landslide scenarios for seismic microzonation: application to the Accumoli area (Rieti, Italy)	Bulletin of Earthquake Engineering	regional landslide analysis	regional mapping|regional risk modelling	ita_4	Central Italy	2016-08-24 01:36:32UTC	Italy
https://www.doi.org/10.1016/S0267-7261(99)00012-3	37	1999	Rodrı́guez, C.E; Bommer, J.J; Chandler, R.J	Earthquake-induced landslides: 1980–1997	Soil Dynamics and Earthquake Engineering	regional landslide analysis	regional landslide comparison	Not Applicable	Not Applicable	Not Applicable	Not Applicable
https://www.doi.org/10.1029/2019JF005163	38	2020	Massey, C. I.; Townsend, D.; Jones, K.; Lukovic, B.; Rhoades, D.; Morgenstern, R.; Rosser, B.; Ries, W.; Howarth, J.; Hamling, I.; Petley, D.; Clark, M.; Wartman, J.; Litchfield, N.; Olsen, M.	Volume Characteristics of Landslides Triggered by the M <sub>W</sub> 7.8 2016 Kaikōura Earthquake, New Zealand, Derived From Digital Surface Difference Modeling	Journal of Geophysical Research: Earth Surface	regional landslide analysis	regional mapping|regional risk modelling	nze_1	Kaikōura	2016-11-14 00:34:22UTC	New Zealand
https://www.doi.org/10.1785/0120200001	39	2020	Jibson, Randall W.	Types and Areal Distribution of Ground Failure Associated with the 2019 Ridgecrest, California, Earthquake Sequence	Bulletin of the Seismological Society of America	regional landslide analysis	regional mapping	usa_3	Ridgecrest, California	2019-07-06 03:19:53UTC	Usa
https://www.doi.org/10.1186/s40623-019-1069-8	40	2019	Kasai, Mio; Yamada, Takashi	Topographic effects on frequency-size distribution of landslides triggered by the Hokkaido Eastern Iburi Earthquake in 2018	Earth, Planets and Space	regional landslide analysis	regional landslide descriptive statistics|regional susceptibility/hazard assessment	jap_6	Hokkaido Eastern Iburi	2018-09-05 18:07:59UTC	Japan
https://www.doi.org/10.1016/j.enggeo.2020.105522	41	2020	Zeng, Qingli; Yuan, Guangxiang; McSaveney, Mauri; Ma, Fengshan; Wei, Rongqiang; Liao, Liye; Du, Hua	Timing and seismic origin of Nixu rock avalanche in southern Tibet and its implications on Nimu active fault	Engineering Geology	Not Applicable	historical/Holocene landslides	Not Applicable	Not Applicable	Not Applicable	Not Applicable
https://www.doi.org/10.1007/s10064-018-01444-4	42	2019	Zhou, Xiaoping; Cheng, Hao; Wong, Louis Ngai Yuen	Three-dimensional stability analysis of seismically induced landslides using the displacement-based rigorous limit equilibrium method	Bulletin of Engineering Geology and the Environment	single landslide analysis	single failure modelling	chin_1	Wenchuan-Sichuan	2008-05-12 06:28:01UTC	China
https://www.doi.org/10.1016/j.jag.2019.102030	43	2020	Liu, Xianwen; Chen, Qiang; Zhao, Jingjing; Xu, Qian; Luo, Rong; Zhang, Yijun; Yang, Yinghui; Liu, Guoxiang	The spatial response pattern of coseismic landslides induced by the 2008 Wenchuan earthquake to the surface deformation and Coulomb stress change revealed from InSAR observations	International Journal of Applied Earth Observation and Geoinformation	regional landslide analysis	regional mapping|regional landslide descriptive statistics	chin_1	Wenchuan-Sichuan	2008-05-12 06:28:01UTC	China
https://www.doi.org/10.1029/2017TC004848	44	2018	Ren, Zhikun; Zhang, Zhuqi; Zhang, Huiping; Zheng, Wenjun; Zhang, Peizhen	The Role of the 2008 Mw 7.9 Wenchuan Earthquake in Topographic Evolution: Seismically Induced Landslides and the Associated Isostatic Response	Tectonics	regional landslide analysis	regional mapping	chin_1	Wenchuan-Sichuan	2008-05-12 06:28:01UTC	China
https://www.doi.org/10.3390/geosciences8080303	45	2018	Albano, Matteo; Saroli, Michele; Montuori, Antonio; Bignami, Christian; Tolomei, Cristiano; Polcari, Marco; Pezzo, Giuseppe; Moro, Marco; Atzori, Simone; Stramondo, Salvatore; Salvi, Stefano	The Relationship between InSAR Coseismic Deformation and Earthquake-Induced Landslides Associated with the 2017 Mw 3.9 Ischia (Italy) Earthquake	Geosciences	regional landslide analysis	regional susceptibility/hazard assessment	ita_8	4km NNE of Casamicciola Terme	2017-08-21 18:57:51UTC	Italy
https://www.doi.org/10.1016/j.geomorph.2020.107317	46	2020	Chen, M.; Tang, C.; Xiong, J.; Shi, Q.Y.; Li, N.; Gong, L.F.; Wang, X.D.; Tie, Y.	The long-term evolution of landslide activity near the epicentral area of the 2008 Wenchuan earthquake in China	Geomorphology	regional landslide analysis	regional mapping|regional landslide descriptive statistics	chin_1	Wenchuan-Sichuan	2008-05-12 06:28:01UTC	China
https://www.doi.org/10.1016/j.enggeo.2020.105671	47	2020	Jibson, Randall W.; Tanyaş, Hakan	The influence of frequency and duration of seismic ground motion on the size of triggered landslides—A regional view	Engineering Geology	regional landslide analysis	regional landslide comparison	usa_4|taiw_1|usa_5|jap_1|chin_1|jap_2	Northridge|Chi Chi|Denali fault|Niigata-Chuetsu|Wenchuan-Sichuan|Kumamoto	1994-01-17 12:30:55UTC|1999-09-20 17:47:18UTC|2002-11-03 22:12:41UTC|2004-10-23 08:56:00UTC|2008-05-12 06:28:01UTC|2016-04-15 16:25:06UTC	USA|Taiwan|USA|Japan|China|Japan
https://www.doi.org/10.1007/s10064-018-1309-3	48	2019	Hung, Ching; Liu, Chih-Hsuan; Lin, Guan-Wei; Leshchinsky, Ben	The Aso-Bridge coseismic landslide: a numerical investigation of failure and runout behavior using finite and discrete element methods	Bulletin of Engineering Geology and the Environment	single landslide analysis	single failure modelling	jap_2	Kumamoto	2016-04-15 16:25:06UTC	Japan
https://www.doi.org/10.1016/j.enggeo.2018.10.015	49	2018	Ghahramani, Negar; Evans, Stephen G.	The 1985 earthquake-triggered North Nahanni rockslide, Northwest Territories, Canada: The co-seismic movement of a sedimentary rock mass conditioned by residual strength	Engineering Geology	single landslide analysis	single failure modelling	can_1	Nahanni	1985-10-05 15:24:02UTC	Canada
https://www.doi.org/10.1016/j.catena.2018.12.013	50	2019	Cao, Juan; Zhang, Zhao; Wang, Chenzhi; Liu, Jifu; Zhang, Liangliang	Susceptibility assessment of landslides triggered by earthquakes in the Western Sichuan Plateau	Catena	regional landslide analysis	regional susceptibility/hazard assessment	chin_1|chin_2|chin_8	Wenchuan-Sichuan |Lushan|Jiuzhaigou County, Sichuan Province	2008-05-12 06:28:01UTC|2013-04-20 00:02:47UTC|2017-08-08 13:19:49UTC	China|China|China
https://www.doi.org/10.1142/S1793431118500094	51	2018	Zhao, Haixin; Yao, Lingkan; Wang, Baoliang; Ali, Sarfraz	Surge Waves Under Earthquake and Clastic Flow Landslide	Journal of Earthquake and Tsunami	Not Applicable	water environment landslides	Not Applicable	Not Applicable	Not Applicable	Not Applicable
https://www.doi.org/10.1007/s11069-020-04019-3	52	2020	Pu, Xiaowu; Wang, Lanmin; Wang, Ping; Chai, Shaofeng	Study of shaking table test of seismic subsidence loess landslides induced by the coupling effect of earthquakes and rainfall	Natural Hazards	single landslide analysis	single failure modelling	Not Applicable	Not Applicable	Not Applicable	Not Applicable
https://www.doi.org/10.1007/s11069-020-03863-7	53	2020	Huang, Yu; Li, Geye; Xiong, Min	Stochastic assessment of slope failure run-out triggered by earthquake ground motion	Natural Hazards	single landslide analysis	single failure modelling	Not Applicable	Not Applicable	Not Applicable	Not Applicable
https://www.doi.org/10.1016/j.catena.2019.104317	54	2020	Nguyen, Ba-Quang-Vinh; Lee, Seung-Rae; Kim, Yun-Tae	Spatial probability assessment of landslide considering increases in pore-water pressure during rainfall and earthquakes: Case studies at Atsuma and Mt. Umyeon	Catena	regional landslide analysis	regional susceptibility/hazard assessment	jap_6	Hokkaido Eastern Iburi	2018-09-05 18:07:59UTC	Japan
https://www.doi.org/10.1142/S0219876218501505	55	2020	Bao, Yangjuan; Huang, Yu; Liu, G. R.; Wang, Guangyu	SPH Simulation of High-Volume Rapid Landslides Triggered by Earthquakes Based on a Unified Constitutive Model. Part I: Initiation Process and Slope Failure	International Journal of Computational Methods	single landslide analysis	single failure modelling	chin_1	Wenchuan-Sichuan	2008-05-12 06:28:01UTC	China
https://www.doi.org/10.1142/S0219876218501499	56	2020	Bao, Yangjuan; Huang, Yu; Liu, G. R.; Zeng, Wei	SPH Simulation of High-Volume Rapid Landslides Triggered by Earthquakes Based on a Unified Constitutive Model. Part II: Solid–Liquid-Like Phase Transition and Flow-Like Landslides	International Journal of Computational Methods	single landslide analysis	single failure modelling	chin_1	Wenchuan-Sichuan	2008-05-12 06:28:01UTC	China
https://www.doi.org/10.1016/j.geomorph.2020.107228	57	2020	Shafique, Muhammad	Spatial and temporal evolution of co-seismic landslides after the 2005 Kashmir earthquake	Geomorphology	regional landslide analysis	regional mapping|regional landslide descriptive statistics	pak_1	Kashmir	2005-10-08 03:50:40UTC	Pakistan
https://www.doi.org/10.1007/s11069-019-03754-6	58	2019	Jin, K. P.; Yao, L. K.; Cheng, Q. G.; Xing, A. G.	Seismic landslides hazard zoning based on the modified Newmark model: a case study from the Lushan earthquake, China	Natural Hazards	regional landslide analysis	regional susceptibility/hazard assessment	chin_1|chin_2	Wenchuan-Sichuan|Lushan	2008-05-12 06:28:01UTC|2013-04-20 00:02:47UTC	China|China
https://www.doi.org/10.1016/j.compgeo.2020.103598	59	2020	Zhu, Chongqiang; Huang, Yu; Sun, Jin	Solid-like and liquid-like granular flows on inclined surfaces under vibration – Implications for earthquake-induced landslides	Computers and Geotechnics	Not Applicable	Not Applicable	Not Applicable	Not Applicable	Not Applicable	Not Applicable
https://www.doi.org/10.1016/j.enggeo.2018.11.015	60	2019	Tsai, Hao-Yu; Tsai, Chi-Chin; Chang, Wei-Chia	Slope unit-based approach for assessing regional seismic landslide displacement for deep and shallow failure	Engineering Geology	regional landslide analysis	regional susceptibility/hazard assessment	taiw_1|usa_4	Chi Chi|Northridge	1999-09-20 17:47:18UTC|1994-01-17 12:30:55UTC	Taiwan|USA
https://www.doi.org/10.1016/j.sandf.2019.08.009	61	2019	Kawamura, Shima; Kawajiri, Shunzo; Hirose, Wataru; Watanabe, Tatsuya	Slope failures/landslides over a wide area in the 2018 Hokkaido Eastern Iburi earthquake	Soils and Foundations	regional landslide analysis	regional mapping	jap_6	Hokkaido Eastern Iburi	2018-09-05 18:07:59UTC	Japan
https://www.doi.org/10.5194/nhess-19-837-2019	62	2019	Milledge, David G.; Densmore, Alexander L.; Bellugi, Dino; Rosser, Nick J.; Watt, Jack; Li, Gen; Oven, Katie J.	Simple rules to minimise exposure to coseismic landslide hazard	Natural Hazards and Earth System Sciences	regional landslide analysis	regional landslide comparison	Not Applicable	Not Applicable	Not Applicable	Not Applicable
https://www.doi.org/10.1007/s11069-019-03582-8	63	2019	Butler, Rhett	Seismic precursors to a 2017 Nuugaatsiaq, Greenland, earthquake–landslide–tsunami event	Natural Hazards	Not Applicable	Not Applicable	Not Applicable	Not Applicable	Not Applicable	Not Applicable
https://www.doi.org/10.1007/s10064-016-0998-8	64	2018	Liu, Jiamei; Shi, Jusong; Wang, Tao; Wu, Shuren	Seismic landslide hazard assessment in the Tianshui area, China, based on scenario earthquakes	Bulletin of Engineering Geology and the Environment	regional landslide analysis	regional susceptibility/hazard assessment	Not Applicable	Not Applicable	Not Applicable	Not Applicable
https://www.doi.org/10.1016/j.geomorph.2019.04.017	65	2019	Croissant, Thomas; Steer, Philippe; Lague, Dimitri; Davy, Philippe; Jeandet, Louise; Hilton, Robert G.	Seismic cycles, earthquakes, landslides and sediment fluxes: Linking tectonics to surface processes using a reduced-complexity model	Geomorphology	regional landslide analysis	regional susceptibility/hazard assessment	Not Applicable	Not Applicable	Not Applicable	Not Applicable
https://www.doi.org/10.1016/j.epsl.2018.11.005	66	2019	Valagussa, A.; Marc, O.; Frattini, P.; Crosta, G.B.	Seismic and geological controls on earthquake-induced landslide size	Earth and Planetary Science Letters	regional landslide analysis	regional landslide comparison	Not Applicable	Not Applicable	Not Applicable	Not Applicable
https://www.doi.org/10.5194/esurf-7-829-2019	67	2019	Rault, Claire; Robert, Alexandra; Marc, Odin; Hovius, Niels; Meunier, Patrick	Seismic and geologic controls on spatial clustering of landslides in three large earthquakes	Earth Surface Dynamics	regional landslide analysis	regional landslide comparison	Not Applicable	Not Applicable	Not Applicable	Not Applicable
https://www.doi.org/10.1139/cgj-2019-0312	68	2020	Nian, Ting-kai; Zhang, Yan-jun; Wu, Hao; Chen, Guang-qi; Zheng, Lu	Runout simulation of seismic landslides using discontinuous deformation analysis (DDA) with state-dependent shear strength model	Canadian Geotechnical Journal	single landslide analysis	single failure modelling	chin_1	Wenchuan-Sichuan	2008-05-12 06:28:01UTC	China
https://www.doi.org/10.1007/s13753-018-0182-9	69	2018	Yue, Xiliu; Wu, Shaohong; Yin, Yunhe; Gao, Jiangbo; Zheng, Jingyun	Risk Identification of Seismic Landslides by Joint Newmark and RockFall Analyst Models: A Case Study of Roads Affected by the Jiuzhaigou Earthquake	International Journal of Disaster Risk Science	regional landslide analysis	regional susceptibility/hazard assessment	chin_8	Jiuzhaigou County, Sichuan Province	2017-08-08 13:19:49UTC	China
https://www.doi.org/10.1007/s10064-019-01716-7	70	2020	Tang, Yin; Che, Ailan; Cao, Yanbo; Zhang, Fanghao	Risk assessment of seismic landslides based on analysis of historical earthquake disaster characteristics	Bulletin of Engineering Geology and the Environment	regional landslide analysis	regional susceptibility/hazard assessment	chin_5	Wenping (Ludian county)	2014-08-03 08:30:13UTC	China
https://www.doi.org/10.3390/rs12050894	71	2020	Liu, Peng; Wei, Yongming; Wang, Qinjun; Chen, Yu; Xie, Jingjing	Research on Post-Earthquake Landslide Extraction Algorithm Based on Improved U-Net Model	Remote Sensing	regional landslide analysis	regional mapping	chin_8	Jiuzhaigou County, Sichuan Province	2017-08-08 13:19:49UTC	China
https://www.doi.org/10.1007/s10346-019-01209-4	72	2019	Quesada-Román, Adolfo; Fallas-López, Berny; Hernández-Espinoza, Karina; Stoffel, Markus; Ballesteros-Cánovas, Juan Antonio	Relationships between earthquakes, hurricanes, and landslides in Costa Rica	Landslides	regional landslide analysis	regional mapping|regional susceptibility/hazard assessment	cos_1	Bijagua	2016-07-03 02:16:13UTC	Costa Rica
https://www.doi.org/10.1007/s10346-019-01171-1	73	2019	Shinoda, Masahiro; Miyata, Yoshihisa; Kurokawa, Ushio; Kondo, Kenichi	Regional landslide susceptibility following the 2016 Kumamoto earthquake using back-calculated geomaterial strength parameters	Landslides	regional landslide analysis	regional susceptibility/hazard assessment	jap_2	Kumamoto	2016-04-15 16:25:06UTC	Japan
https://www.doi.org/10.1007/s10346-019-01136-4	74	2019	Tanyaş, Hakan; van Westen, Cees J.; Persello, Claudio; Alvioli, Massimiliano	Rapid prediction of the magnitude scale of landslide events triggered by an earthquake	Landslides	regional landslide analysis	regional landslide comparison	Not Applicable	Not Applicable	Not Applicable	Not Applicable
https://www.doi.org/10.1007/s12205-020-0963-8	75	2020	Nguyen, Vinh Ba-Quang; Kim, Yun-Tae	Rainfall-Earthquake-Induced Landslide Hazard Prediction by Monte Carlo Simulation: A Case Study of MT. Umyeon in Korea	KSCE Journal of Civil Engineering	Not Applicable	rainfall-induced landslides	Not Applicable	Not Applicable	Not Applicable	Not Applicable
https://www.doi.org/10.1126/sciadv.aba6790	76	2020	LaHusen, S. R.; Duvall, A. R.; Booth, A. M.; Grant, A.; Mishkin, B. A.; Montgomery, D. R.; Struble, W.; Roering, J. J.; Wartman, J.	Rainfall triggers more deep-seated landslides than Cascadia earthquakes in the Oregon Coast Range, USA	Science Advances	Not Applicable	historical/Holocene landslides|rainfall-induced landslides	Not Applicable	Not Applicable	Not Applicable	Not Applicable
https://www.doi.org/10.1038/s41467-020-14445-3	77	2020	Bontemps, Noélie; Lacroix, Pascal; Larose, Eric; Jara, Jorge; Taipe, Edu	Rain and small earthquakes maintain a slow-moving landslide in a persistent critical state	Nature Communications	single landslide analysis	single failure modelling	per_1|per_2	10 km SSW of Maca|39km N of Lluta	2016-02-20 02:05:50UTC|2016-08-15 02:59:00UTC	Peru|Peru
https://www.doi.org/10.1016/j.enggeo.2018.11.003	78	2019	Li, Hai-bo; Li, Xiao-wen; Li, Wan-zhou; Zhang, Shi-lin; Zhou, Jia-wen	Quantitative assessment for the rockfall hazard in a post-earthquake high rock slope using terrestrial laser scanning	Engineering Geology	single landslide analysis	single failure modelling	chin_5	Wenping (Ludian county)	2014-08-03 08:30:13UTC	China
https://www.doi.org/10.1016/j.enggeo.2019.105436	79	2020	Zhang, Shuai; Li, Can; Zhang, Limin; Peng, Ming; Zhan, Liangtong; Xu, Qiang	Quantification of human vulnerability to earthquake-induced landslides using Bayesian network	Engineering Geology	regional landslide analysis	regional risk modelling	chin_1	Wenchuan-Sichuan	2008-05-12 06:28:01UTC	China
https://www.doi.org/10.1007/s10064-018-01438-2	80	2019	Wang, Yunsheng; Wu, L. Z.; Gu, Jin	Process analysis of the Moxi earthquake-induced Lantianwan landslide in the Dadu River, China	Bulletin of Engineering Geology and the Environment	Not Applicable	historical/Holocene landslides	chin_7	Moxi	1786-06-01	China
https://www.doi.org/10.1007/s11629-019-5618-1	81	2020	Wang, Tao; Liu, Jia-mei; Shi, Ju-song; Gao, Meng-tan; Wu, Shu-ren	Probabilistic seismic landslide hazard assessment: a case study in Tianshui, Northwest China	Journal of Mountain Science	regional landslide analysis	regional susceptibility/hazard assessment	Not Applicable	Not Applicable	Not Applicable	Not Applicable
https://www.doi.org/10.1016/j.catena.2020.104502	82	2020	Zhao, Bo; Wang, Yunsheng; Feng, Qianqian; Guo, Fengshuang; Zhao, Xun; Ji, Feng; Liu, Jiangwei; Ming, Weiting	Preliminary analysis of some characteristics of coseismic landslides induced by the Hokkaido Iburi-Tobu earthquake (September 5, 2018), Japan	Catena	regional landslide analysis	regional mapping|regional landslide descriptive statistics	jap_6	Hokkaido Eastern Iburi	2018-09-05 18:07:59UTC	Japan
https://www.doi.org/10.1007/s10346-020-01543-y	83	2020	Stringer, James; Brook, Martin S.; Justice, Richard	Post-earthquake monitoring of landslides along the Southern Kaikōura Transport Corridor, New Zealand	Landslides	regional landslide analysis	regional mapping	nze_1	Kaikōura	2016-11-14 00:34:22UTC	New Zealand
https://www.doi.org/10.3390/rs11080978	84	2019	Shao, Xiaoyi; Ma, Siyuan; Xu, Chong; Zhang, Pengfei; Wen, Boyu; Tian, Yingying; Zhou, Qing; Cui, Yulong	Planet Image-Based Inventorying and Machine Learning-Based Susceptibility Mapping for the Landslides Triggered by the 2018 Mw6.6 Tomakomai, Japan Earthquake	Remote Sensing	regional landslide analysis	regional mapping|regional susceptibility/hazard assessment	jap_6	Hokkaido Eastern Iburi	2018-09-05 18:07:59UTC	Japan
https://www.doi.org/10.1193/082117EQS165M	85	2018	Franke, Kevin W.; Lingwall, Bret N.; Zimmaro, Paolo; Kayen, Robert E.; Tommasi, Paolo; Chiabrando, Filiberto; Santo, Antonio	Phased Reconnaissance Approach to Documenting Landslides following the 2016 Central Italy Earthquakes	Earthquake Spectra	regional landslide analysis|single landslide analysis	regional mapping|single failure mapping	ita_4|ita_5|ita_6	Amatrice|Castelsantangelo sul nera|Norcia	2016-08-24 01:36:32UTC|2016-10-26 19:18:08UTC|2016-10-30 06:40:18UTC	Italy|Italy|Italy
https://www.doi.org/10.1007/s11629-018-5067-2	86	2019	Zhang, Ying-bin; Xiang, Chen-lin; Chen, Yan-long; Cheng, Qian-gong; Xiao, Li; Yu, Peng-cheng; Chang, Zhi-wang	Permanent displacement models of earthquake-induced landslides considering near-fault pulse-like ground motions	Journal of Mountain Science	regional landslide analysis	regional susceptibility/hazard assessment	Not Applicable	Not Applicable	Not Applicable	Not Applicable
https://www.doi.org/10.1016/j.soildyn.2020.106272	87	2020	Ling, Zhu; Xiangjun, Pei; Shenghua, Cui; Shanyong, Wang; Xiaochao, Zhang; Yufei, Liang	On the initiation mechanism of the Daguangbao landslide triggered by the 2008 Wenchuan (Ms 7.9) earthquake	Soil Dynamics and Earthquake Engineering	single landslide analysis	single failure mapping|single failure geotechnical characterization|single failure modelling	chin_1	Wenchuan-Sichuan	2008-05-12 06:28:01UTC	China
https://www.doi.org/10.1029/2018JB016378	88	2018	Zhao, Tao; Crosta, Giovanni Battista	On the Dynamic Fragmentation and Lubrication of Coseismic Landslides	Journal of Geophysical Research: Solid Earth	single landslide analysis	single failure geotechnical characterization|single failure modelling	chin_1	Wenchuan-Sichuan	2008-05-12 06:28:01UTC	China
https://www.doi.org/10.1007/s10064-018-01433-7	89	2019	Huang, Da; Song, Yi Xiang; Ma, Guo Wei; Pei, Xiang Jun; Huang, Run Qiu	Numerical modeling of the 2008 Wenchuan earthquake-triggered Niumiangou landslide considering effects of pore-water pressure	Bulletin of Engineering Geology and the Environment	single landslide analysis	single failure geotechnical characterization|single failure modelling	chin_1	Wenchuan-Sichuan	2008-05-12 06:28:01UTC	China
https://www.doi.org/10.1007/s10346-020-01446-y	90	2020	Wang, Huanling; Liu, Shiqi; Xu, Weiya; Yan, Long; Qu, Xiao; Xie, Wei-Chau	Numerical investigation on the sliding process and deposit feature of an earthquake-induced landslide: a case study	Landslides	single landslide analysis	single failure geotechnical characterization|single failure modelling	chin_5	Wenping (Ludian county)	2014-08-03 08:30:13UTC	China
https://www.doi.org/10.1007/s10346-018-1040-y	91	2018	Zhang, Zezhong; Fleurisson, Jean-Alain; Pellet, Frederic L.	Numerical evidence of site effects contributing to triggering the Las Colinas landslide during the 2001 Mw = 7.7 El Salvador earthquake	Landslides	single landslide analysis	single failure geotechnical characterization|single failure modelling	elsa_1	El salvador 2001_1	2001-01-13 17:33:32UTC	El Salvador
https://www.doi.org/10.1016/j.jrmge.2019.05.004	92	2019	He, Manchao; Ribeiro e Sousa, L.; Müller, André; Vargas, Eurípedes; Sousa, R.L.; Oliveira, C. Sousa; Gong, Weili	Numerical and safety considerations about the Daguangbao landslide induced by the 2008 Wenchuan earthquake	Journal of Rock Mechanics and Geotechnical Engineering	single landslide analysis	single failure geotechnical characterization|single failure modelling	chin_1	Wenchuan-Sichuan	2008-05-12 06:28:01UTC	China
https://www.doi.org/10.1016/j.enggeo.2019.105239	93	2019	Zhang, Weijie; Xiao, Danqiang	Numerical analysis of the effect of strength parameters on the large-deformation flow process of earthquake-induced landslides	Engineering Geology	single landslide analysis	single failure geotechnical characterization|single failure modelling	chin_1	Wenchuan-Sichuan	2008-05-12 06:28:01UTC	China
https://www.doi.org/10.1080/19475705.2019.1650126	94	2019	Moayedi, Hossein; Mehrabi, Mohammad; Kalantar, Bahareh; Abdullahi Mu’azu, Mohammed; A. Rashid, Ahmad Safuan; Foong, Loke Kok; Nguyen, Hoang	Novel hybrids of adaptive neuro-fuzzy inference system (ANFIS) with several metaheuristic algorithms for spatial susceptibility assessment of seismic-induced landslide	Geomatics, Natural Hazards and Risk	regional landslide analysis	regional susceptibility/hazard assessment	Not Applicable	Not Applicable	Not Applicable	Not Applicable
https://www.doi.org/10.1080/19475705.2018.1520745	95	2019	Han, Zheng; Li, Yange; Du, Yinfei; Wang, Weidong; Chen, Guangqi	Noncontact detection of earthquake-induced landslides by an enhanced image binarization method incorporating with Monte-Carlo simulation	Geomatics, Natural Hazards and Risk	regional landslide analysis	regional mapping	chin_1	Wenchuan-Sichuan	2008-05-12 06:28:01UTC	China
https://www.doi.org/10.3390/geosciences9030122	96	2019	Calista, Monia; Miccadei, Enrico; Piacentini, Tommaso; Sciarra, Nicola	Morphostructural, Meteorological and Seismic Factors Controlling Landslides in Weak Rocks: The Case Studies of Castelnuovo and Ponzano (North East Abruzzo, Central Italy)	Geosciences	single landslide analysis	single failure mapping|single failure geotechnical characterization|single failure geophysical characterization|single failure modelling	ita_4|ita_5|ita_6|ita_7	Amatrice|Castelsantangelo sul nera|Norcia|Montereale	2016-08-24 01:36:32UTC|2016-10-26 19:18:08UTC|2016-10-30 06:40:18UTC|2017-01-18 10:25:25UTC	Italy|Italy|Italy|Italy
https://www.doi.org/10.1016/j.enggeo.2018.11.011	97	2019	Luo, Jing; Pei, Xiangjun; Evans, Stephen G.; Huang, Runqiu	Mechanics of the earthquake-induced Hongshiyan landslide in the 2014 Mw 6.2 Ludian earthquake, Yunnan, China	Engineering Geology	single landslide analysis	single failure mapping|single failure geotechnical characterization|single failure modelling	chin_5	Wenping (Ludian county)	2014-08-03 08:30:13UTC	China
https://www.doi.org/10.1007/s10064-019-01583-2	98	2020	Gnyawali, Kaushal Raj; Zhang, Yonghong; Wang, Guojie; Miao, Lijuan; Pradhan, Ananta Man Singh; Adhikari, Basanta Raj; Xiao, Liming	Mapping the susceptibility of rainfall and earthquake triggered landslides along China–Nepal highways	Bulletin of Engineering Geology and the Environment	regional landslide analysis	regional susceptibility/hazard assessment	nep_1	Gorkha	2015-04-25 06:11:25UTC	Nepal
https://www.doi.org/10.3390/rs12172767	99	2020	Chen, Yu; Wei, Yongming; Wang, Qinjun; Chen, Fang; Lu, Chunyan; Lei, Shaohua	Mapping Post-Earthquake Landslide Susceptibility: A U-Net Like Approach	Remote Sensing	regional landslide analysis	regional susceptibility/hazard assessment	chin_1	Wenchuan-Sichuan	2008-05-12 06:28:01UTC	China
https://www.doi.org/10.1080/19475705.2018.1487471	100	2019	Tian, Yingying; Xu, Chong; Hong, Haoyuan; Zhou, Qing; Wang, Duo	Mapping earthquake-triggered landslide susceptibility by use of artificial neural network (ANN) models: an example of the 2013 Minxian (China) Mw 5.9 event	Geomatics, Natural Hazards and Risk	regional landslide analysis	regional susceptibility/hazard assessment	chin_3	Minxian-Zhangxian	2013-07-21 23:45:56UTC	China
https://www.doi.org/10.1016/j.enggeo.2018.08.010	101	2018	Valkaniotis, Sotiris; Papathanassiou, George; Ganas, Athanassios	Mapping an earthquake-induced landslide based on UAV imagery; case study of the 2015 Okeanos landslide, Lefkada, Greece	Engineering Geology	single landslide analysis	single failure mapping	gre_2	10km WSW of Nidri	2015-11-17 07:10:07UTC	Greece
https://www.doi.org/10.5194/esurf-7-107-2019	102	2019	Marc, Odin; Behling, Robert; Andermann, Christoff; Turowski, Jens M.; Illien, Luc; Roessner, Sigrid; Hovius, Niels	Long-term erosion of the Nepal Himalayas by bedrock landsliding: the role of monsoons, earthquakes and giant landslides	Earth Surface Dynamics	Not Applicable	Landscape evolution	nep_1	Gorkha	2015-04-25 06:11:25UTC	Nepal
https://www.doi.org/10.1785/0120200025	103	2020	Zimmaro, Paolo; Nweke, Chukwuebuka C.; Hernandez, Janis L.; Hudson, Kenneth S.; Hudson, Martin B.; Ahdi, Sean K.; Boggs, Matthew L.; Davis, Craig A.; Goulet, Christine A.; Brandenberg, Scott J.; Hudnut, Kenneth W.; Stewart, Jonathan P.	Liquefaction and Related Ground Failure from July 2019 Ridgecrest Earthquake Sequence	Bulletin of the Seismological Society of America	Not Applicable	ground deformations and failure/liquefaction processes	usa_3	Ridgecrest, California	2019-07-06 03:19:53UTC	USA
https://www.doi.org/10.1127/zfg_suppl/2019/0504	104	2019	Pérez-López, R.; Giner-Robles, J.L.; Rodríguez-Pascua, M.A.; Silva, P.G.; Roquero, E.; Bardají, T.; Elez, J.; Huerta, P.	Lichenometric dating of coseismic rockfall related to the Great Lisbon Earthquake in 1755 affecting the archaeological site of "Tolmo de Minateda" (Spain)	Zeitschrift für Geomorphologie	Not Applicable	historical/Holocene landslides	por_2	Lisboa	1755-11-01	Portugal
https://www.doi.org/10.1139/cgj-2018-0250	105	2019	Islam, Naveel; Hawlader, Bipul; Wang, Chen; Soga, Kenichi	Large-deformation finite-element modelling of earthquake-induced landslides considering strain-softening behaviour of sensitive clay	Canadian Geotechnical Journal	single landslide analysis	Single failure modelling	Not Applicable	Not Applicable	Not Applicable	Not Applicable
https://www.doi.org/10.1007/s12665-018-7974-5	106	2018	Huang, Yu; Zhao, Liuyuan; Xiong, Min; Liu, Chun; Lu, Ping	Critical slip surface and landslide volume of a soil slope under random earthquake ground motions	Environmental Earth Sciences	single landslide analysis	Single failure modelling	Not Applicable	Not Applicable	Not Applicable	Not Applicable
https://www.doi.org/10.1007/s10346-019-01146-2	107	2019	Zhao, Bo; Li, Weile; Wang, Yunsheng; Lu, Jiayan; Li, Xiang	Landslides triggered by the Ms 6.9 Nyingchi earthquake, China (18 November 2017): analysis of the spatial distribution and occurrence factors	Landslides	regional landslide analysis	regional mapping|regional landslide descriptive statistics	chin_9	Nyingchi	2017-11-18 00:32:01UTC	China
https://www.doi.org/10.1007/s10346-020-01439-x	108	2020	Massey, C. I.; Townsend, D. T.; Lukovic, B.; Morgenstern, R.; Jones, K.; Rosser, B.; de Vilder, S.	Landslides triggered by the MW7.8 14 November 2016 Kaikōura earthquake: an update	Landslides	regional landslide analysis	regional mapping|regional landslide descriptive statistics|regional susceptibility/hazard assessment	nze_1	Kaikōura	2016-11-14 00:34:22UTC	New Zealand
https://www.doi.org/10.1080/19475705.2015.1075162	109	2020	Wu, Weiying; Xu, Chong; Wang, Xiaoqing; Tian, Yingying; Deng, Fei	Landslides Triggered by the 3 August 2014 Ludian (China) Mw 6.2 Earthquake: An Updated Inventory and Analysis of Their Spatial Distribution	Journal of Earth Science	regional landslide analysis	regional mapping	chin_5	Wenping (Ludian county)	2014-08-03 08:30:13UTC	China
https://www.doi.org/10.3390/geosciences9090371	110	2019	Chunga, Kervin; Livio, Franz A.; Martillo, Carlos; Lara-Saavedra, Hernán; Ferrario, Maria Francesca; Zevallos, Ivan; Michetti, Alessandro Maria	Landslides Triggered by the 2016 Mw 7.8 Pedernales, Ecuador Earthquake: Correlations with ESI-07 Intensity, Lithology, Slope and PGA-h	Geosciences	regional landslide analysis	regional mapping|regional landslide descriptive statistics	ecu_3	M 7.8 - 27km SSE of Muisne, Ecuador	2016-04-16 23:58:36UTC	Ecuador
https://www.doi.org/10.1007/s11069-019-03718-w	111	2019	Ferrario, M. F.	Landslides triggered by multiple earthquakes: insights from the 2018 Lombok (Indonesia) events	Natural Hazards	regional landslide analysis	regional mapping	Not Applicable	Not Applicable	Not Applicable	Not Applicable
https://www.doi.org/10.1007/s10346-020-01359-w	112	2020	Martino, S.; Antonielli, B.; Bozzano, F.; Caprari, P.; Discenza, M. E.; Esposito, C.; Fiorucci, M.; Iannucci, R.; Marmoni, G.M.; Schilirò, L.	Landslides triggered after the 16 August 2018 Mw 5.1 Molise earthquake (Italy) by a combination of intense rainfalls and seismic shaking	Landslides	regional landslide analysis	regional mapping|regional landslide descriptive statistics	ita_11	Palata, Molise	2018-08-16 18:19:05UTC	Italy
https://www.doi.org/10.1007/s10346-019-01150-6	113	2019	Serey, Alejandra; Piñero-Feliciangeli, Laura; Sepúlveda, Sergio A.; Poblete, Fernando; Petley, David N.; Murphy, William	Landslides induced by the 2010 Chile megathrust earthquake: a comprehensive inventory and correlations with geological and seismic factors	Landslides	regional landslide analysis	regional mapping|regional landslide descriptive statistics	chil_2	Maule	2010-02-27 06:34:11UTC	Chile
https://www.doi.org/10.1007/s10346-019-01168-w	114	2019	Hu, Kaiheng; Zhang, Xiaopeng; You, Yong; Hu, Xudong; Liu, Weiming; Li, Yong	Landslides and dammed lakes triggered by the 2017 Ms6.9 Milin earthquake in the Tsangpo gorge	Landslides	regional landslide analysis	regional mapping	chin_9	Nyingchi	2017-11-18 00:32:01UTC	China
https://www.doi.org/10.3390/geosciences9060268	115	2019	Gordo, Cristina; Zêzere, José Luís; Marques, Rui	Landslide Susceptibility Assessment at the Basin Scale for Rainfall- and Earthquake-Triggered Shallow Slides	Geosciences	regional landslide analysis	regional susceptibility/hazard assessment	por_1	Azores Islands	2005-09-20 13:29:56UTC	Portugal
https://www.doi.org/10.1007/s10346-019-01292-7	116	2020	Barth, Sophia; Geertsema, Marten; Bevington, Alexandre R.; Bird, Alison L.; Clague, John J.; Millard, Tom; Bobrowsky, Peter T.; Hasler, Andreas; Liu, Hongjiang	Landslide response to the 27 October 2012 earthquake (MW 7.8), southern Haida Gwaii, British Columbia, Canada	Landslides	regional landslide analysis	regional mapping	can_2	Haida Gwaii	2012-10-28 03:04:08UTC	Canada
https://www.doi.org/10.1007/s10346-020-01366-x	117	2020	Tian, Yingying; Owen, Lewis A.; Xu, Chong; Ma, Siyuan; Li, Kang; Xu, Xiwei; Figueiredo, Paula Marques; Kang, Wenjun; Guo, Peng; Wang, Siyu; Liang, Xiaohua; Maharjan, Sudan Bikash	Landslide development within 3 years after the 2015 Mw 7.8 Gorkha earthquake, Nepal	Landslides	regional landslide analysis	regional mapping|regional risk modelling	nep_1|nep_2	Gorkha|Gorkha_2	2015-04-25 06:11:25UTC|2015-05-12 07:05:19UTC	Nepal|Nepal
https://www.doi.org/10.1007/s10064-019-01557-4	118	2020	Wang, Wenpei; Yin, Yueping; Yang, Longwei; Zhang, Nan; Wei, Yunjie	Investigation and dynamic analysis of the catastrophic rockslide avalanche at Xinmo, Maoxian, after the Wenchuan Ms 8.0 earthquake	Bulletin of Engineering Geology and the Environment	single landslide analysis	single failure modelling	chin_1	Wenchuan-Sichuan	2008-05-12 06:28:01UTC	China
https://www.doi.org/10.1007/s12583-018-0869-2	119	2019	Tian, Yingying; Xu, Chong; Ma, Siyuan; Xu, Xiwei; Wang, Shiyuan; Zhang, He	Inventory and Spatial Distribution of Landslides Triggered by the 8th August 2017 MW 6.5 Jiuzhaigou Earthquake, China	Journal of Earth Science	regional landslide analysis	regional mapping|regional landslide descriptive statistics	chin_8	Jiuzhaigou County, Sichuan Province	2017-08-08 13:19:49UTC	China
https://www.doi.org/10.1061/(ASCE)GM.1943-5622.0001800	120	2020	Gao, Ge; Meguid, Mohamed A.; Chouinard, Luc E.; Xu, Chong	Insights into the Transport and Fragmentation Characteristics of Earthquake-Induced Rock Avalanche: Numerical Study	International Journal of Geomechanics	single landslide analysis	single failure geotechnical characterization|single failure modelling	chin_2	Lushan	2013-04-20 00:02:47UTC	China
https://www.doi.org/10.1007/s10346-019-01162-2	121	2019	Martino, S.; Bozzano, F.; Caporossi, P.; D’Angiò, D.; Della Seta, M.; Esposito, C.; Fantini, A.; Fiorucci, M.; Giannini, L. M.; Iannucci, R.; Marmoni, G. M.; Mazzanti, P.; Missori, C.; Moretto, S.; Piacentini, D.; Rivellino, S.; Romeo, R. W.; Sarandrea, P.; Schilirò, L.; Troiani, F.; Varone, C.	Impact of landslides on transportation routes during the 2016–2017 Central Italy seismic sequence	Landslides	regional landslide analysis	regional mapping|regional landslide descriptive statistics	ita_4|ita_5|ita_6|ita_7	Amatrice|Castelsantangelo sul nera|Norcia|Montereale	2016-08-24 01:36:32UTC|2016-10-26 19:18:08UTC|2016-10-30 06:40:18UTC|2017-01-18 10:25:25UTC	Italy|Italy|Italy|Italy
https://www.doi.org/10.1016/j.enggeo.2019.105158	122	2019	Huang, Da; Li, Yan Qi; Song, Yi Xiang; Xu, Qiang; Pei, Xiang Jun	Insights into the catastrophic Xinmo rock avalanche in Maoxian county, China: Combined effects of historical earthquakes and landslide amplification	Engineering Geology	single landslide analysis	single failure geotechnical characterization|single failure modelling	Not Applicable	Not Applicable	Not Applicable	Not Applicable
https://www.doi.org/10.12911/22998993/116325	123	2020	Tunas, I Gede; Tanga, Arody; Oktavia, Siti	Impact of Landslides Induced by the 2018 Palu Earthquake on Flash Flood in Bangga River Basin, Sulawesi, Indonesia	Journal of Ecological Engineering	Not Applicable	rainfall-induced landslides	indo_1	Palu	2018-09-28 10:02:45UTC	Indonesia
https://www.doi.org/10.1038/s41561-019-0448-x	124	2019	Watkinson, Ian M.; Hall, Robert	Impact of communal irrigation on the 2018 Palu earthquake-triggered landslides	Nature Geoscience	regional landslide analysis	regional mapping|regional landslide descriptive statistics|regional susceptibility/hazard assessment	indo_1	Palu	2018-09-28 10:02:45UTC	Indonesia
https://www.doi.org/10.5194/nhess-19-1789-2019	125	2019	Zhang, Jianqiang; van Westen, Cees J.; Tanyas, Hakan; Mavrouli, Olga; Ge, Yonggang; Bajrachary, Samjwal; Gurung, Deo Raj; Dhital, Megh Raj; Khanal, Narendral Raj	How size and trigger matter: analyzing rainfall- and earthquake-triggered landslide inventories and their causal relation in the Koshi River basin, central Himalaya	Natural Hazards and Earth System Sciences	regional landslide analysis	regional mapping|regional landslide descriptive statistics|regional susceptibility/hazard assessment	nep_1|nep_2	Gorkha|Gorkha_2	2015-04-25 06:11:25UTC|2015-05-12 07:05:19UTC	Nepal|Nepal
https://www.doi.org/10.1785/0220190187	126	2020	Jibson, Randall W.; R. Grant, Alex R.; Witter, Robert C.; Allstadt, Kate E.; Thompson, Eric M.; Bender, Adrian M.	Ground Failure from the Anchorage, Alaska, Earthquake of 30 November 2018	Seismological Research Letters	regional landslide analysis|single landslide analysis	regional mapping|regional landslide comparison|single failure modelling	usa_1|usa_2	Anchorage|Alaska	2018-11-30 17:29:29UTC|1964-03-28 03:36:16UTC	USA|USA
https://www.doi.org/10.1007/s12040-019-1319-y	127	2020	Sangeeta; Maheshwari, Bal Krishna; Kanungo, Debi Prasanna	GIS-based pre- and post-earthquake landslide susceptibility zonation with reference to 1999 Chamoli earthquake	Journal of Earth System Science	regional landslide analysis	regional susceptibility/hazard assessment	ind_1	Chamoli	1999-03-28 19:05:11UTC	India
https://www.doi.org/10.5194/nhess-19-1973-2019	128	2019	Yi, Yaning; Zhang, Zhijie; Zhang, Wanchang; Xu, Qi; Deng, Cai; Li, Qilun	GIS-based earthquake-triggered-landslide susceptibility mapping with an integrated weighted index model in Jiuzhaigou region of Sichuan Province, China	Natural Hazards and Earth System Sciences	regional landslide analysis	regional mapping|regional susceptibility/hazard assessment	chin_8	Jiuzhaigou County, Sichuan Province	2017-08-08 13:19:49UTC	China
https://www.doi.org/10.1142/S0219876218500469	129	2018	Hu, Man; Liu, Qiuqiang; Wu, Fei; Yu, Mengting; Jiang, Shenghua	GIS Enabled SPH-Soil Modeling for the Post-Failure Flow of Landslides Under Seismic Loadings	International Journal of Computational Methods	single landslide analysis	single failure modelling	chin_1	Wenchuan-Sichuan	2008-05-12 06:28:01UTC	China
https://www.doi.org/10.1029/2019JF005056	130	2019	Lombardo, Luigi; Bakka, Haakon; Tanyas, Hakan; Westen, Cees; Mai, P. Martin; Huser, Raphaël	Geostatistical Modeling to Capture Seismic‐Shaking Patterns From Earthquake‐Induced Landslides	Journal of Geophysical Research: Earth Surface	regional landslide analysis	regional landslide comparison|regional susceptibility/hazard assessment	chin_1|chin_2	Wenchuan-Sichuan|Lushan	2008-05-12 06:28:01UTC|2013-04-20 00:02:47UTC	China|China
https://www.doi.org/10.3389/feart.2020.572449	131	2020	Tian, Yingying; Owen, Lewis A.; Xu, Chong; Shen, Lingling; Zhou, Qing; Figueiredo, Paula Marques	Geomorphometry and Statistical Analyses of Landslides Triggered by the 2015 Mw 7.8 Gorkha Earthquake and the Mw 7.3 Aftershock, Nepal	Frontiers in Earth Science	regional landslide analysis	regional landslide descriptive statistics	nep_1|nep_2	Gorkha|Gorkha_2	2015-04-25 06:11:25UTC|2015-05-12 07:05:19UTC	Nepal|Nepal
https://www.doi.org/10.1007/s10064-017-1021-8	132	2019	Ehteshami-Moinabadi, Mohsen; Nasiri, Shahram	Geometrical and structural setting of landslide dams of the Central Alborz: a link between earthquakes and landslide damming	Bulletin of Engineering Geology and the Environment	Not Applicable	water environment landslides|historical/Holocene landslides	Not Applicable	Not Applicable	Not Applicable	Not Applicable
https://www.doi.org/10.1029/2007JB005309	133	2008	Bozzano, F.; Lenti, L.; Martino, S.; Paciello, A.; Mugnozza, G. Scarascia	Self-excitation process due to local seismic amplification responsible for the reactivation of the Salcito landslide (Italy) on 31 October 2002	Journal of Geophysical Research: Solid Earth	single landslide analysis	single failure mapping|single failure geotechnical characterization|single failure geophysical characterization|single failure modelling	ita_9	Molise	2002-10-31 10:32:58UTC	Italy
https://www.doi.org/10.1007/s10346-008-0131-6	134	2008	Wang, Huabin; Wang, Gonghui; Wang, Fawu; Sassa, Kyoji; Chen, Yuping	Probabilistic modeling of seismically triggered landslides using Monte Carlo simulations	Landslides	regional landslide analysis	regional susceptibility/hazard assessment	jap_1	Niigata-Chuetsu	2004-10-23 08:56:00UTC	Japan
https://www.doi.org/10.1016/j.geomorph.2008.03.003	135	2008	Kamp, Ulrich; Growley, Benjamin J.; Khattak, Ghazanfar A.; Owen, Lewis A.	GIS-based landslide susceptibility mapping for the 2005 Kashmir earthquake region	Geomorphology	regional landslide analysis	regional mapping|regional susceptibility/hazard assessment	pak_1	Kashmir	2005-10-08 03:50:40UTC	Pakistan
https://www.doi.org/10.1016/j.epsl.2008.07.020	136	2008	Meunier, Patrick; Hovius, Niels; Haines, John Allan	Topographic site effects and the location of earthquake induced landslides	Earth and Planetary Science Letters	regional landslide analysis	regional mapping|regional landslide comparison|regional susceptibility/hazard assessment	taiw_1|usa_4|png_1	Chi chi|Northridge|Ramu-Markham Valley	1999-09-20 17:47:18UTC|1994-01-17 12:30:55UTC|1993-10-13 02:06:00UTC	Taiwan|USA|Papua New Guinea
https://www.doi.org/10.5194/nhess-9-539-2009	137	2009	Esposito, E.; Pece, R.; Porfido, S.; Tranfaglia, G.	Ground effects and hydrological changes in the Southern Apennines (Italy) in response to the 23 July 1930 earthquake (<i>M<sub>S</sub></i>=6.7)	Natural Hazards and Earth System Sciences	regional landslide analysis	regional mapping|regional landslide descriptive statistics	ita_10	Irpinia 1930	1930-07-23 00:08:41UTC	Italy
https://www.doi.org/10.5027/andgeoV36n1-a10	138	2009	Sepúlveda, Sergio A; Serey, Alejandra	Tsunamigenic, earthquake-triggered rock slope failures during the April 21, 2007 Aisén earthquake, southern Chile (45.5°S)	Andean geology	regional landslide analysis	regional mapping	chil_1	Aysén Fjord (Patagonia)	2007-04-21 17:53:46UTC	Chile
https://www.doi.org/10.1061/(ASCE)1527-6988(2009)10:1(19)	139	2009	Miles, S. B.; Keefer, D. K.	Toward a Comprehensive Areal Model of Earthquake-Induced Landslides	Natural Hazards Review	other		Not Applicable	Not Applicable	Not Applicable	Not Applicable
https://www.doi.org/10.1016/j.ijrmms.2008.07.010	140	2009	Wu, Jian-Hong; Lin, Jeen-Shang; Chen, Chao-Shi	Dynamic discrete analysis of an earthquake-induced large-scale landslide	International Journal of Rock Mechanics and Mining Sciences	single landslide analysis	single failure modelling	taiw_1	Chi Chi	1999-09-20 17:47:18UTC	Taiwan
https://www.doi.org/10.1002/esp.1708	141	2009	Wang, Gonghui; Sassa, Kyoji	Seismic loading impacts on excess pore-water pressure maintain landslide triggered flowslides	Earth Surface Processes and Landforms	single landslide analysis	single failure mapping|single failure modelling|single failure geotechnical characterization|single failure geophysical characterization	jap_7	Sanriku-Minami	2003-05-26 09:24:33UTC	Japan
https://www.doi.org/10.1016/j.enggeo.2008.08.004	142	2009	Miles, Scott B.; Keefer, David K.	Evaluation of CAMEL — comprehensive areal model of earthquake-induced landslides	Engineering Geology	regional landslide analysis	regional susceptibility/hazard assessment	usa_7	Loma Prieta, California Earthquake	1989-10-18 00:04:15UTC	USA
https://www.doi.org/10.1007/s10346-009-0141-z	143	2009	Wang, Fawu; Cheng, Qiangong; Highland, Lynn; Miyajima, Masakatsu; Wang, Huabin; Yan, Changgen	Preliminary investigation of some large landslides triggered by the 2008 Wenchuan earthquake, Sichuan Province, China	Landslides	regional landslide analysis	regional mapping	chin_1	Wenchuan-Sichuan	2008-05-12 06:28:01UTC	China
https://www.doi.org/10.1016/j.tecto.2007.11.008	144	2009	Dong, Jia-Jyun; Lee, Wang-Ru; Lin, Ming-Lang; Huang, An-Bin; Lee, Yen-Liang	Effects of seismic anisotropy and geological characteristics on the kinematics of the neighboring Jiufengershan and Hungtsaiping landslides during Chi-Chi earthquake	Tectonophysics	single landslide analysis	single failure geotechnical characterization|single failure modelling	taiw_1	Chi Chi	1999-09-20 17:47:18UTC	Taiwan
https://www.doi.org/10.1016/j.tecto.2007.11.019	145	2009	Tseng, Chia-Han; Hu, Jyr-Ching; Chan, Yu-Chang; Chu, Hao-Tsu; Lee, Jin-Fa; Wei, Jheng-Yue; Lu, Chia-Yu; Lin, Ming-Lang	Non-catastrophic landslides induced by the Mw 7.6 Chi-Chi earthquake in central Taiwan as revealed by PIV analysis	Tectonophysics	regional landslide analysis	regional mapping	taiw_1	Chi Chi	1999-09-20 17:47:18UTC	Taiwan
https://www.doi.org/10.1007/s00254-008-1323-z	146	2008	Peng, Wen-Fei; Wang, Chein-Lee; Chen, Shih-Tsu; Lee, Shing-Tsz	A seismic landslide hazard analysis with topographic effect, a case study in the 99 Peaks region, Central Taiwan	Environmental Geology	regional landslide analysis	regional susceptibility/hazard assessment	taiw_1	Chi Chi	1999-09-20 17:47:18UTC	Taiwan
https://www.doi.org/10.1016/j.cageo.2008.09.007	147	2009	Peng, Wen-Fei; Wang, Chein-Lee; Chen, Shih-Tsu; Lee, Shing-Tsz	Incorporating the effects of topographic amplification and sliding areas in the modeling of earthquake-induced landslide hazards, using the cumulative displacement method	Computers & Geosciences	regional landslide analysis	regional susceptibility/hazard assessment	taiw_1	Chi Chi	1999-09-20 17:47:18UTC	Taiwan
https://www.doi.org/10.1007/s10346-009-0147-6	148	2009	Sato, H. P.; Harp, E. L.	Interpretation of earthquake-induced landslides triggered by the 12 May 2008, M7.9 Wenchuan earthquake in the Beichuan area, Sichuan Province, China using satellite imagery and Google Earth	Landslides	regional landslide analysis	regional mapping|regional landslide descriptive statistics	chin_1	Wenchuan-Sichuan	2008-05-12 06:28:01UTC	China
https://www.doi.org/10.1007/s10346-009-0148-5	149	2009	Yin, Yueping; Wang, Fawu; Sun, Ping	Landslide hazards triggered by the 2008 Wenchuan earthquake, Sichuan, China	Landslides	regional landslide analysis	regional landslide descriptive statistics|single failure mapping	chin_1	Wenchuan-Sichuan	2008-05-12 06:28:01UTC	China
https://www.doi.org/10.1007/s10706-008-9242-z	150	2009	Hasegawa, Shuichi; Dahal, Ranjan Kumar; Nishimura, Toshiaki; Nonomura, Atsuko; Yamanaka, Minoru	DEM-Based Analysis of Earthquake-Induced Shallow Landslide Susceptibility	Geotechnical and Geological Engineering	regional landslide analysis	regional mapping|regional susceptibility/hazard assessment	jap_1	Niigata-Chuetsu	2004-10-23 08:56:00UTC	Japan
https://www.doi.org/10.1007/s11803-009-9025-4	151	2009	Tang, Chuan; Zhu, Jing; Liang, Jingtao	Emergency assessment of seismic landslide susceptibility: a case study of the 2008 Wenchuan earthquake affected area	Earthquake Engineering and Engineering Vibration	regional landslide analysis	regional mapping|regional susceptibility/hazard assessment	chin_1	Wenchuan-Sichuan	2008-05-12 06:28:01UTC	China
https://www.doi.org/10.1007/s11434-009-0283-3	152	2009	Chen, XiaoLi; Kato, Nobuaki; Tsunaki, Ryosuke; Mukai, Keiji	Prediction of slope failure due to earthquake	Science Bulletin	regional landslide analysis	regional susceptibility/hazard assessment	jap_1	Niigata-Chuetsu	2004-10-23 08:56:00UTC	Japan
https://www.doi.org/10.1016/j.enggeo.2009.08.007	153	2009	Evans, Stephen G.; Roberts, Nicholas J.; Ischuk, Anatoli; Delaney, Keith B.; Morozova, Galina S.; Tutubalina, Olga	Landslides triggered by the 1949 Khait earthquake, Tajikistan, and associated loss of life	Engineering Geology	regional landslide analysis|single landslide analysis	regional mapping|single failure mapping|single failure modelling	taj_1	Khait	1949-07-10 03:53:41UTC	Tajikistan
https://www.doi.org/10.1007/s10346-009-0182-3	154	2009	Yagi, Hiroshi; Sato, Go; Higaki, Daisuke; Yamamoto, Miki; Yamasaki, Takanari	Distribution and characteristics of landslides induced by the Iwate–Miyagi Nairiku Earthquake in 2008 in Tohoku District, Northeast Japan	Landslides	regional landslide analysis	regional mapping|regional landslide descriptive statistics	jap_4	Iwate–Miyagi Nairiku (eastern Honshu, Japan)	2008-06-13 23:43:45UTC	Japan
https://www.jstor.org/stable/pdf/24107254.pdf	155	2009	Ray, P. K. Champati; Parvaiz, I.; Jayangondaperumal, R.; Thakur, V. C.; Dadhwal, V. K.; Bhat, F. A.	Analysis of seismicity-induced landslides due to the 8 October 2005 earthquake in Kashmir Himalaya	Current Science	regional landslide analysis	regional mapping|regional landslide descriptive statistics	pak_1	Kashmir	2005-10-08 03:50:40UTC	Pakistan
https://www.doi.org/10.5194/nhess-10-2475-2010	156	2010	Lee, S. T.; Yu, T. T.; Peng, W. F.; Wang, C. L.	Incorporating the effects of topographic amplification in the analysis of earthquake-induced landslide hazards using logistic regression	Natural Hazards and Earth System Sciences	regional landslide analysis	regional susceptibility/hazard assessment	taiw_1	Chi Chi	1999-09-20 17:47:18UTC	Taiwan
https://www.doi.org/10.5194/nhess-10-1307-2010	157	2010	García-Rodríguez, M. J.; Malpica, J. A.	Assessment of earthquake-triggered landslide susceptibility in El Salvador based on an Artificial Neural Network model	Natural Hazards and Earth System Sciences	regional landslide analysis	regional susceptibility/hazard assessment	elsa_1|elsa_2	El salvador 2001_1|El salvador 2001_2	2001-01-13 17:33:32UTC|2001-02-13 14:22:05UTC	El Salvador|El Salvador
https://www.doi.org/10.1080/01431161003727630	158	2010	Zhang, Wenjiang; Lin, Jiayuan; Peng, Jian; Lu, Qifeng	Estimating Wenchuan Earthquake induced landslides based on remote sensing	International Journal of Remote Sensing	regional landslide analysis	regional mapping	chin_1	Wenchuan-Sichuan	2008-05-12 06:28:01UTC	China
https://www.doi.org/10.1007/s12583-010-0008-1	159	2010	Tang, Huiming; Jia, Hongbiao; Hu, Xinli; Li, Dewei; Xiong, Chengren	Characteristics of landslides induced by the great Wenchuan earthquake	Journal of Earth Science	regional landslide analysis|single landslide analysis	regional landslide descriptive statistics|single failure mapping	chin_1	Wenchuan-Sichuan	2008-05-12 06:28:01UTC	China
https://www.doi.org/10.1002/nag.812	160	2010	Gerolymos, Nikos	Numerical modeling of seismic triggering, evolution, and deposition of rapid landslides: Application to Higashi–Takezawa (2004)	International Journal for Numerical and Analytical Methods in Geomechanics	single landslide analysis	single failure modelling	jap_1	Niigata-Chuetsu	2004-10-23 08:56:00UTC	Japan
https://www.doi.org/10.1016/j.jseaes.2009.12.002	161	2010	Yin, Jinhui; Chen, Jie; Xu, XiWei; Wang, Xulong; Zheng, Yonggang	The characteristics of the landslides triggered by the Wenchuan Ms 8.0 earthquake from Anxian to Beichuan	Journal of Asian Earth Sciences	regional landslide analysis	regional landslide descriptive statistics	chin_1	Wenchuan-Sichuan	2008-05-12 06:28:01UTC	China
https://www.doi.org/10.1007/s12665-009-0215-1	162	2010	Wang, Kuo-Lung; Lin, Meei-Ling	Development of shallow seismic landslide potential map based on Newmark’s displacement: the case study of Chi-Chi earthquake, Taiwan	Environmental Earth Sciences	regional landslide analysis	regional susceptibility/hazard assessment	taiw_1	Chi Chi	1999-09-20 17:47:18UTC	Taiwan
https://www.doi.org/10.1007/s10346-009-0192-1	163	2010	Pareek, Naveen; Sharma, Mukat L.; Arora, Manoj K.	Impact of seismic factors on landslide susceptibility zonation: a case study in part of Indian Himalayas	Landslides	regional landslide analysis	regional susceptibility/hazard assessment	ind_1	Chamoli	1999-03-28 19:05:11UTC	India
https://www.doi.org/10.1016/j.geomorph.2010.01.003	164	2010	Chigira, Masahiro; Wu, Xiyong; Inokuchi, Takashi; Wang, Gonghui	Landslides induced by the 2008 Wenchuan earthquake, Sichuan, China	Geomorphology	regional landslide analysis	regional mapping	chin_1	Wenchuan-Sichuan	2008-05-12 06:28:01UTC	China
https://www.doi.org/10.1007/s11589-010-0719-5	165	2010	Wang, Xiuying; Nie, Gaozhong; Wang, Dengwei	Relationships between ground motion parameters and landslides induced by Wenchuan earthquake	Earthquake Science	regional landslide analysis	regional landslide descriptive statistics	chin_1	Wenchuan-Sichuan	2008-05-12 06:28:01UTC	China
https://www.doi.org/10.1016/j.enggeo.2010.03.006	166	2010	Rapolla, A.; Paoletti, V.; Secomandi, M.	Seismically-induced landslide susceptibility evaluation: Application of a new procedure to the island of Ischia, Campania Region, Southern Italy	Engineering Geology	regional landslide analysis	regional susceptibility/hazard assessment	ita_8	4km NNE of Casamicciola Terme	2017-08-21 18:57:51UTC	Italy
https://www.doi.org/10.1007/s11069-009-9451-7	167	2010	Kamp, Ulrich; Owen, Lewis A.; Growley, Benjamin J.; Khattak, Ghazanfar A.	Back analysis of landslide susceptibility zonation mapping for the 2005 Kashmir earthquake: an assessment of the reliability of susceptibility zoning maps	Natural Hazards	regional landslide analysis	regional susceptibility/hazard assessment	pak_1	Kashmir	2005-10-08 03:50:40UTC	Pakistan
https://www.doi.org/10.3208/sandf.50.533	168	2010	Wakai, Akihiko; Ugai, Keizo; Onoue, Atsuo; Kuroda, Seiichiro; Higuchi, Kunihiro	Numerical Modeling of an Earthquake-Induced Landslide Considering the Strain-Softening Characteristics at the Bedding Plane	Soils and Foundations	single landslide analysis	single failure modelling	Not Applicable	Not Applicable	Not Applicable	Not Applicable
https://www.doi.org/10.1007/s11069-009-9467-z	169	2010	Guemache, Mehdi A.; Machane, Djamel; Beldjoudi, Hamoud; Gharbi, Sofiane; Djadia, Leila; Benahmed, Sihem; Ymmel, Hayet	On a damaging earthquake-induced landslide in the Algerian Alps: the March 20, 2006 Laâlam landslide (Babors chain, northeast Algeria), triggered by the Kherrata earthquake (M w = 5.3)	Natural Hazards	single landslide analysis	single failure mapping	alg_1	M 5.2 - northern Algeria	2006-03-20 19:44:25UTC	Algeria
https://www.doi.org/10.1007/s11069-009-9466-0	170	2010	Bouhadad, Y.; Benhamouche, A.; Bourenane, H.; Ait Ouali, A.; Chikh, M.; Guessoum, N.	The Laalam (Algeria) damaging landslide triggered by a moderate earthquake (Mw = 5.2)	Natural Hazards	single landslide analysis	single failure mapping	alg_1	M 5.2 - northern Algeria	2006-03-20 19:44:25UTC	Algeria
https://www.doi.org/10.1007/s10346-010-0230-z	171	2010	Sassa, Kyoji; Nagai, Osamu; Solidum, Renato; Yamazaki, Yoichi; Ohta, Hidemasa	An integrated model simulating the initiation and motion of earthquake and rain induced rapid landslides and its application to the 2006 Leyte landslide	Landslides	single landslide analysis	single failure modelling	phi_1	M 4.3 - Leyte	2006-02-17 02:36:32UTC	Philippines
https://www.doi.org/10.1007/s11629-010-2016-0	172	2010	Zhuang, Jianqi; Cui, Peng; Hu, Kaiheng; Chen, Xiaoqing; Ge, Yonggang	Characteristics of earthquake-triggered landslides and post-earthquake debris flows in Beichuan County	Journal of Mountain Science	regional landslide analysis	regional landslide descriptive statistics	chin_1	Wenchuan-Sichuan	2008-05-12 06:28:01UTC	China
https://www.doi.org/10.1007/s11629-010-2015-1	173	2010	Su, Fenghuan; Cui, Peng; Zhang, Jianqiang; Xiang, Lingzhi	Susceptibility assessment of landslides caused by the wenchuan earthquake using a logistic regression model	Journal of Mountain Science	regional landslide analysis	regional susceptibility/hazard assessment	chin_1	Wenchuan-Sichuan	2008-05-12 06:28:01UTC	China
https://www.doi.org/10.1016/j.enggeo.2010.07.011	174	2010	Qi, Shengwen; Xu, Qiang; Lan, Hengxing; Zhang, Bing; Liu, Jianyou	Spatial distribution analysis of landslides triggered by 2008.5.12 Wenchuan Earthquake, China	Engineering Geology	regional landslide analysis	regional mapping|regional landslide descriptive statistics	chin_1	Wenchuan-Sichuan	2008-05-12 06:28:01UTC	China
https://www.doi.org/10.1785/0120090256	175	2010	Yuan, Ren-Mao; Xu, Xi-Wei; Chen, Gui-Hua; Tan, Xi-Bin; Klinger, Yann; Xing, Hui-Lin	Ejection Landslide at Northern Terminus of Beichuan Rupture Triggered by the 2008 Mw 7.9 Wenchuan Earthquake	Bulletin of the Seismological Society of America	single landslide analysis	single failure modelling	chin_1	Wenchuan-Sichuan	2008-05-12 06:28:01UTC	China
https://www.doi.org/10.1007/s10346-010-0211-2	176	2010	Gratchev, Ivan; Towhata, Ikuo	Geotechnical characteristics of volcanic soil from seismically induced Aratozawa landslide, Japan	Landslides	single landslide analysis	single failure geotechnical characterization	jap_4	Iwate–Miyagi Nairiku (eastern Honshu, Japan)	2008-06-13 23:43:45UTC	Japan
https://www.doi.org/10.1007/s10346-010-0203-2	177	2010	Sepúlveda, Sergio A.; Serey, Alejandra; Lara, Marisol; Pavez, Andrés; Rebolledo, Sofía	Landslides induced by the April 2007 Aysén Fjord earthquake, Chilean Patagonia	Landslides	regional landslide analysis	regional mapping	chil_1	Aysén Fjord (Patagonia)	2007-04-21 17:53:46UTC	Chile
https://www.doi.org/10.1007/s11629-010-2054-7	178	2010	Wang, Meng; Qiao, Jianping; He, Siming	GIS-based earthquake-triggered landslide hazard zoning using contributing weight model	Journal of Mountain Science	regional landslide analysis	regional susceptibility/hazard assessment	chin_1	Wenchuan-Sichuan	2008-05-12 06:28:01UTC	China
https://www.doi.org/10.1007/s12583-010-0143-8	179	2010	Wei, Fangqiang; Chernomorets, Sergey; Aristov, Konstantin; Petrakov, Dmitry; Tutubalina, Olga; Su, Pengcheng; Jiang, Yuhong; Xu, Aisong; Petrasov, Alexey	A Seismically triggered landslide in the Niujuan valley near the epicenter of the 2008 Wenchuan earthquake	Journal of Earth Science	single landslide analysis	single failure mapping	chin_1	Wenchuan-Sichuan	2008-05-12 06:28:01UTC	China
https://www.doi.org/10.1016/j.geomorph.2010.07.026	180	2010	Saba, Sumbal Bahar; van der Meijde, Mark; van der Werff, Harald	Spatiotemporal landslide detection for the 2005 Kashmir earthquake region	Geomorphology	regional landslide analysis	regional mapping	pak_1	Kashmir	2005-10-08 03:50:40UTC	Pakistan
https://www.doi.org/10.1016/j.jag.2010.05.006	181	2010	Yang, Xiaojun; Chen, Liding	Using multi-temporal remote sensor imagery to detect earthquake-triggered landslides	International Journal of Applied Earth Observation and Geoinformation	regional landslide analysis	regional mapping	chin_1	Wenchuan-Sichuan	2008-05-12 06:28:01UTC	China
https://www.doi.org/10.1016/j.jag.2010.06.002	182	2010	Chang, Kuang-Tsung; Wan, Shiuan; Lei, Tsu-Chiang	Development of a spatial decision support system for monitoring earthquake-induced landslides based on aerial photographs and the finite element method	International Journal of Applied Earth Observation and Geoinformation	single landslide analysis	single failure modelling	taiw_1	Chi Chi	1999-09-20 17:47:18UTC	Taiwan
https://www.doi.org/10.1080/01431161.2010.502158	183	2011	Lodhi, Mahtab A.	Earthquake-induced landslide mapping in the western Himalayas using medium resolution ASTER imagery	International Journal of Remote Sensing	regional landslide analysis	regional mapping	pak_1	Kashmir	2005-10-08 03:50:40UTC	Pakistan
https://www.doi.org/10.1139/T10-059	184	2010	Tang, Chuan TangC; Zhu, Jing ZhuJ; Qi, Xin QiX	Landslide hazard assessment of the 2008 Wenchuan earthquake: a case study in Beichuan area	Canadian Geotechnical Journal	regional landslide analysis	regional susceptibility/hazard assessment	chin_1	Wenchuan-Sichuan	2008-05-12 06:28:01UTC	China
https://www.doi.org/10.1007/s10064-010-0334-7	185	2011	Yin, Yueping; Zheng, Wanmo; Li, Xiaochun; Sun, Ping; Li, Bin	Catastrophic landslides associated with the M8.0 Wenchuan earthquake	Bulletin of Engineering Geology and the Environment	single landslide analysis	single failure geotechnical characterization	chin_1	Wenchuan-Sichuan	2008-05-12 06:28:01UTC	China
https://www.doi.org/10.1007/s10064-017-1097-1	186	2019	Song, Kun; Wang, Fawu; Dai, Zili; Iio, Akinori; Osaka, Osamu; Sakata, Seiji	Geological characteristics of landslides triggered by the 2016 Kumamoto earthquake in Mt. Aso volcano, Japan	Bulletin of Engineering Geology and the Environment	single landslide analysis	single failure geotechnical characterization	jap_2	Kumamoto	2016-04-15 16:25:06UTC	Japan
https://www.doi.org/10.3390/geosciences9040173	187	2019	Naik, Sambit; Kim, Young-Seog; Kim, Taehyung; Su-Ho, Jeong	Geological and Structural Control on Localized Ground Effects within the Heunghae Basin during the Pohang Earthquake (MW 5.4, 15th November 2017), South Korea	Geosciences	Not Applicable	ground deformations and failure/liquefaction processes	kor_1	7 km SW of Heunghae	2017-11-15 05:29:32UTC	Korea
https://www.doi.org/10.1038/s41598-019-48820-y	188	2019	Kameda, Jun; Kamiya, Hiro; Masumoto, Hirokazu; Morisaki, Tomonori; Hiratsuka, Toru; Inaoi, Chisaki	Fluidized landslides triggered by the liquefaction of subsurface volcanic deposits during the 2018 Iburi–Tobu earthquake, Hokkaido	Scientific Reports	regional landslide analysis	regional landslide descriptive statistics	jap_6	Hokkaido Eastern Iburi	2018-09-05 18:07:59UTC	Japan
https://www.doi.org/10.1007/s10064-019-01541-y	189	2019	Zhu, Yuxuan; Dai, Fuchu; Yao, Xin; Tu, Xinbin; Shi, Xinshuai	Field investigation and numerical simulation of the seismic triggering mechanism of the Tahman landslide in eastern Pamir, Northwest China	Bulletin of Engineering Geology and the Environment	Not Applicable	historical/Holocene landslides	Not Applicable	Not Applicable	Not Applicable	Not Applicable
https://www.doi.org/10.1007/s10346-020-01532-1	190	2020	He, Kun; Li, Yongjian; Ma, Guotao; Hu, Xiewen; Liu, Bo; Ma, Zhigang; Xu, Zepeng	Failure mode analysis of post-seismic rockfall in shattered mountains exemplified by detailed investigation and numerical modelling	Landslides	single landslide analysis	single failure modelling	chin_1	Wenchuan-Sichuan	2008-05-12 06:28:01UTC	China
https://www.doi.org/10.1007/s10346-020-01401-x	191	2020	Li, Ran; Wang, Fawu; Zhang, Shuai	Failure mechanism of a flow-like landslide triggered by the 2018 Western Shimane Earthquake	Landslides	single landslide analysis	single failure geotechnical characterization	jap_8	M 5.7 - 9km NNE of Oda	2018-04-08 16:32:31UTC	Japan
https://www.doi.org/10.1007/s11709-019-0582-y	192	2020	Lin, Jeng-Wen; Hsieh, Meng-Hsun; Li, Yu-Jen	Factor analysis for the statistical modeling of earthquake-induced landslides	Frontiers of Structural and Civil Engineering	other		Not Applicable	Not Applicable	Not Applicable	Not Applicable
https://www.doi.org/10.1007/s10064-020-01745-7	193	2020	Fu, Xiaodong; Sheng, Qian; Du, Wenjie; Mei, Hongru; Chen, He; Du, Yuxiang	Evaluation of dynamic stability and analysis of reinforcement measures of a landslide under seismic action: a case study on the Yanyangcun landslide	Bulletin of Engineering Geology and the Environment	single landslide analysis	single failure modelling	Not Applicable	Not Applicable	Not Applicable	Not Applicable
https://www.doi.org/10.1007/s10064-017-1083-7	194	2019	Lin, Guan-Wei; Hung, Ching; Syu, Huei-Sian	Evaluation of an enhanced FS method for finding the initiation time of earthquake-induced landslides	Bulletin of Engineering Geology and the Environment	single landslide analysis	single failure modelling	taiw_1|taiw_2	Chi Chi|M 6.4 - 25km SE of Yujing, Taiwan	1999-09-20 17:47:18UTC|2016-02-05 19:57:27UTC	Taiwan|Taiwan
https://www.doi.org/10.1016/j.enggeo.2019.105238	195	2019	Fan, R.L.; Zhang, L.M.; Shen, P.	Evaluating volume of coseismic landslide clusters by flow direction-based partitioning	Engineering Geology	single landslide analysis	single failure modelling|single landslide comparison	chin_1	Wenchuan-Sichuan	2008-05-12 06:28:01UTC	China
https://www.doi.org/10.3390/rs11060638	196	2019	Dou, Jie; Yunus, Ali P.; Tien Bui, Dieu; Sahana, Mehebub; Chen, Chi-Wen; Zhu, Zhongfan; Wang, Weidong; Pham, Binh Thai	Evaluating GIS-Based Multiple Statistical Models and Data Mining for Earthquake and Rainfall-Induced Landslide Susceptibility Using the LiDAR DEM	Remote Sensing	regional landslide analysis	regional mapping|regional susceptibility/hazard assessment	jap_1	Niigata-Chuetsu	2004-10-23 08:56:00UTC	Japan
https://www.doi.org/10.5194/nhess-19-889-2019	197	2019	Kanari, Mor; Katz, Oded; Weinberger, Ram; Porat, Naomi; Marco, Shmuel	Evaluating earthquake-induced rockfall hazard near the Dead Sea Transform	Natural Hazards and Earth System Sciences	regional landslide analysis	regional susceptibility/hazard assessment	Not Applicable	Not Applicable	Not Applicable	Not Applicable
https://www.doi.org/10.1007/s12665-020-09021-3	198	2020	Huang, Da; Li, Yan Qi; Song, Yi Xiang; Ma, Wen Zhu; Ma, Guo Wei	Ejection landslides triggered by the 2008 Wenchuan earthquake and movement modelling using aerodynamic theory and artificial disintegration collision technique	Environmental Earth Sciences	single landslide analysis	single failure modelling	chin_1	Wenchuan-Sichuan	2008-05-12 06:28:01UTC	China
https://www.doi.org/10.3390/ijgi8080328	199	2019	Shao; Xu; Ma; Zhou	Effects of Seismogenic Faults on the Predictive Mapping of Probability to Earthquake-Triggered Landslides	ISPRS International Journal of Geo-Information	regional landslide analysis	regional susceptibility/hazard assessment	chin_2	Lushan	2013-04-20 00:02:47UTC	China
https://www.doi.org/10.1002/ldr.3098	200	2018	Yang, Wentao; Qi, Wenwen; Zhou, Jinxing	Effects of precipitation and topography on vegetation recovery at landslide sites after the 2008 Wenchuan earthquake	Land Degradation & Development	Not Applicable	Vegetation and EQILs	chin_1	Wenchuan-Sichuan	2008-05-12 06:28:01UTC	China
https://www.doi.org/10.5194/se-10-463-2019	201	2019	von Specht, Sebastian; Ozturk, Ugur; Veh, Georg; Cotton, Fabrice; Korup, Oliver	Effects of finite source rupture on landslide triggering: the 2016 7.1 Kumamoto earthquake	Solid Earth	regional landslide analysis	regional susceptibility/hazard assessment	jap_2	Kumamoto	2016-04-15 16:25:06UTC	Japan
https://www.doi.org/10.1038/s41561-019-0444-1	202	2019	Bradley, Kyle; Mallick, Rishav; Andikagumi, Harisma; Hubbard, Judith; Meilianda, Ella; Switzer, Adam; Du, Nairong; Brocard, Gilles; Alfian, Dedy; Benazir, Benazir; Feng, Guangcai; Yun, Sang-Ho; Majewski, Jedrzej; Wei, Shengji; Hill, Emma M.	Earthquake-triggered 2018 Palu Valley landslides enabled by wet rice cultivation	Nature Geoscience	regional landslide analysis	regional risk modelling	indo_1	Palu	2018-09-28 10:02:45UTC	Indonesia
https://www.doi.org/10.3390/geosciences9070305	203	2019	Konovalov, Alexey; Gensiorovskiy, Yuriy; Lobkina, Valentina; Muzychenko, Alexandra; Stepnova, Yuliya; Muzychenko, Leonid; Stepnov, Andrey; Mikhalyov, Mikhail	Earthquake-Induced Landslide Risk Assessment: An Example from Sakhalin Island, Russia	Geosciences	regional landslide analysis	regional risk modelling	rus_1	Tatar Strait	2007-08-02 02:37:42UTC	Russia
https://www.doi.org/10.3390/rs11202351	204	2019	Aimaiti, Yusupujiang; Liu, Wen; Yamazaki, Fumio; Maruyama, Yoshihisa	Earthquake-Induced Landslide Mapping for the 2018 Hokkaido Eastern Iburi Earthquake Using PALSAR-2 Data	Remote Sensing	regional landslide analysis	regional mapping	jap_6	Hokkaido Eastern Iburi	2018-09-05 18:07:59UTC	Japan
https://www.doi.org/10.1007/s40098-018-0334-2	205	2019	Sangeeta; Maheshwari, B. K.	Earthquake-Induced Landslide Hazard Assessment of Chamoli District, Uttarakhand Using Relative Frequency Ratio Method	Indian Geotechnical Journal	regional landslide analysis	regional susceptibility/hazard assessment	ind_1	Chamoli	1999-03-28 19:05:11UTC	India
https://www.doi.org/10.1193/062318EQS160M	206	2019	Kang, Sinhang; Kim, Byungmin; Bae, Sungjin; Lee, Hyejin; Kim, Mirae	Earthquake-Induced Ground Deformations in the Low-Seismicity Region: A Case of the 2017 M5.4 Pohang, South Korea, Earthquake	Earthquake Spectra	regional landslide analysis	regional mapping	kor_1	7 km SW of Heunghae	2017-11-15 05:29:32UTC	Korea
https://www.doi.org/10.1785/0120180051	207	2018	Chunga, Kervin; Livio, Franz; Mulas, Maurizio; Ochoa‐Cornejo, Felipe; Besenzon, Davide; Ferrario, Maria Francesca; Michetti, Alessandro Maria	Earthquake Ground Effects and Intensity of the 16 April 2016 Mw 7.8 Pedernales, Ecuador, Earthquake: Implications for the Source Characterization of Large Subduction Earthquakes	Bulletin of the Seismological Society of America	other|regional landslide analysis	regional mapping	ecu_3	M 7.8 - 27km SSE of Muisne, Ecuador	2016-04-16 23:58:36UTC	Ecuador
https://www.doi.org/10.3390/ijgi9040198	208	2020	Chen, Xiao-li; Shan, Xin-jian; Wang, Ming-ming; Liu, Chun-guo; Han, Na-na	Distribution Pattern of Coseismic Landslides Triggered by the 2017 Jiuzhaigou Ms 7.0 Earthquake of China: Control of Seismic Landslide Susceptibility	ISPRS International Journal of Geo-Information	regional landslide analysis	regional susceptibility/hazard assessment	chin_8	Jiuzhaigou County, Sichuan Province	2017-08-08 13:19:49UTC	China
https://www.doi.org/10.1007/s10346-020-01508-1	209	2020	Gao, Ge; Meguid, Mohamed A.; Chouinard, Luc E.; Zhan, Weiwei	Dynamic disintegration processes accompanying transport of an earthquake-induced landslide	Landslides	single landslide analysis	single failure modelling	chin_1	Wenchuan-Sichuan	2008-05-12 06:28:01UTC	China
https://www.doi.org/10.1016/j.enggeo.2020.105696	210	2020	Yamada, Masumi; Matsushi, Yuki; Matsuzawa, Takanori	Dynamic movement history of the Iiyama slope failure revealed from seismic data	Engineering Geology	Not Applicable	Not Applicable	Not Applicable	Not Applicable	Not Applicable	Not Applicable
https://www.doi.org/10.1007/s10346-019-01315-3	211	2020	Wang, Weiping; Yang, Jiansi; Wang, Yanbin	Dynamic processes of 2018 Sedongpu landslide in Namcha Barwa–Gyala Peri massif revealed by broadband seismic records	Landslides	Not Applicable	Not Applicable	Not Applicable	Not Applicable	Not Applicable	Not Applicable
https://www.doi.org/10.1007/s10064-018-1233-6	212	2019	Li, Hai-Bo; Li, Xiao-Wen; Ning, Yu; Jiang, Shu-Fang; Zhou, Jia-Wen	Dynamical process of the Hongshiyan landslide induced by the 2014 Ludian earthquake and stability evaluation of the back scarp of the remnant slope	Bulletin of Engineering Geology and the Environment	single landslide analysis	single failure mapping	chin_5	Wenping (Ludian county)	2014-08-03 08:30:13UTC	China
https://www.doi.org/10.1016/j.geomorph.2018.11.024	213	2019	Yano, Atsuhisa; Shinohara, Yoshinori; Tsunetaka, Haruka; Mizuno, Hideaki; Kubota, Tetsuya	Distribution of landslides caused by heavy rainfall events and an earthquake in northern Aso Volcano, Japan from 1955 to 2016	Geomorphology	regional landslide analysis	regional mapping	jap_2	Kumamoto	2016-04-15 16:25:06UTC	Japan
https://www.doi.org/10.1016/j.geomorph.2018.04.012	214	2018	Zhuang, Jianqi; Peng, Jianbing; Xu, Chong; Li, Zhenhong; Densmore, Alexander; Milledge, David; Iqbal, Javed; Cui, Yifei	Distribution and characteristics of loess landslides triggered by the 1920 Haiyuan Earthquake, Northwest of China	Geomorphology	regional landslide analysis	regional mapping|regional landslide descriptive statistics	chin_4	Haiyuan	1920-12-16 12:05:55UTC	China
https://www.doi.org/10.1007/s10706-018-0481-3	215	2018	Song, Zhi-Chen; Zhao, Lian-Heng; Li, Liang; Zhang, Yingbin; Tang, Gaopeng	Distinct Element Modelling of a Landslide Triggered by the 5.12 Wenchuan Earthquake: A Case Study	Geotechnical and Geological Engineering	single landslide analysis	single failure modelling	chin_1	Wenchuan-Sichuan	2008-05-12 06:28:01UTC	China
https://www.doi.org/10.1007/s10064-018-1381-8	216	2019	Tang, Ran; Fan, Xuanmei; Scaringi, Gianvito; Xu, Qiang; van Westen, Cees J.; Ren, Jing; Havenith, Hans-Balder	Distinctive controls on the distribution of river-damming and non-damming landslides induced by the 2008 Wenchuan earthquake	Bulletin of Engineering Geology and the Environment	regional landslide analysis	regional susceptibility/hazard assessment|regional landslide descriptive statistics	chin_1	Wenchuan-Sichuan	2008-05-12 06:28:01UTC	China
https://www.doi.org/10.1130/0016-7606(1993)105<0521:AOTSOO>2.3.CO;2	217	1993	Jibson, Randall W.; Keefer, David K.	Analysis of the seismic origin of landslides: Examples from the New Madrid seismic zone	GSA Bulletin	Not Applicable	historical/Holocene landslides	usa_9|usa_10|usa_11	New Madrid 1|New Madrid 2|New Madrid 3	1811-12-16|1812-01-23|1812-02-07	USA|USA|USA
https://www.infona.pl/resource/bwmeta1.element.elsevier-5f954583-62ca-37b5-b1ec-4cc29d59513d/tab/summary	218	1996	Alkema, D.; Mosselman, M.; Paulussen, I.	Earthquake-triggered landslides at the Brunssummerheide, Limburg, the Netherlands: preliminary studies following the 1992 Roermond earthquake	International Journal of Rock Mechanics and Mining Sciences and Geomechanics Abstracts	single landslide analysis	single failure modelling	neth_1	1 km W of Kessenich, Belgium	1992-04-13 01:20:00UTC	The Netherlands
https://www.doi.org/10.1016/j.net.2018.07.016	219	2018	Kwag, Shinyoung; Hahm, Daegi	Development of an earthquake-induced landslide risk assessment approach for nuclear power plants	Nuclear Engineering and Technology	single landslide analysis	single failure impact/risk modelling	Not Applicable	Not Applicable	Not Applicable	Not Applicable
https://www.doi.org/10.1002/eqe.4290230502	220	1994	Ambraseys, N. N.; Srbulov, M.	Attenuation of earthquake-induced ground displacements	Earthquake Engineering & Structural Dynamics	regional landslide analysis	regional landslide comparison	Not Applicable	Not Applicable	Not Applicable	Not Applicable
https://www.doi.org/10.1016/0169-555X(94)90021-3	221	1994	Keefer, David K.	The importance of earthquake-induced landslides to long-term slope erosion and slope-failure hazards in seismically active regions	Geomorphology	regional landslide analysis	regional landslide comparison	Not Applicable	Not Applicable	Not Applicable	Not Applicable
https://www.doi.org/10.1785/BSSA0840040963	222	1994	Jibson, R.W.; Prentice, C.S.; Borissoff, B.A.; Rogozhin, E.A.; Langer, C.J.	Some observations of landslides triggered by the 29 April 1991 Racha earthquake, Republic of Georgia	Bulletin of the Seismological Society of America	regional landslide analysis	regional mapping	geo_1	Sak'art'velo (Racha region)	1991-04-29 09:12:48UTC	Georgia
https://www.doi.org/10.1007/s12665-019-8438-2	223	2019	Li, Wei Chao; Deng, Gang; Cao, Wen; Xu, Chong; Chen, Jian; Lee, Min Lee	Discrete element modeling of the Hongshiyan landslide triggered by the 2014 Ms 6.5 Ludian earthquake in Yunnan, China	Environmental Earth Sciences	single landslide analysis	single failure modelling	chin_5	Wenping (Ludian county)	2014-08-03 08:30:13UTC	China
https://www.doi.org/10.1016/j.ejrs.2019.04.002	224	2020	Goorabi, Abolghasem	Detection of landslide induced by large earthquake using InSAR coherence techniques – Northwest Zagros, Iran	The Egyptian Journal of Remote Sensing and Space Science	regional landslide analysis	regional mapping	ira_1	29 km S of ?alabja	2017-11-12 18:18:17UTC	Iran
https://www.doi.org/10.1016/1040-6182(94)00036-5	225	1995	Crozier, M. J.; Deimel, M. S.; Simon, J. S.	Investigation of earthquake triggering for deep-seated landslides, Taranaki, New Zealand	Quaternary International	Not Applicable	historical/Holocene landslides	Not Applicable	Not Applicable	Not Applicable	Not Applicable
https://www.doi.org/10.1785/BSSA0850010093	226	1995	Harp, Edwin L.; Jibson, Randall W.	Seismic instrumentation of landslides: Building a better model of dynamic landslide behavior	Bulletin of the Seismological Society of America	Not Applicable	Not Applicable	Not Applicable	Not Applicable	Not Applicable	Not Applicable
https://www.doi.org/10.1785/BSSA0850040986	227	1995	Madole, Richard F.; Schuster, Robert L.; Sarna-Wojcicki, Andrei M.	Ribbon cliff landslide, Washington, and the earthquake of 14 December 1872	Bulletin of the Seismological Society of America	Not Applicable	historical/Holocene landslides	usa_13	Lake Chelan, Washington	1872-12-15 05:40:00UTC	USA
https://www.doi.org/10.1785/BSSA08601BS319	228	1996	Harp, Edwin L.; Jibson, Randall W.	Landslides triggered by the 1994 Northridge, California, earthquake	Bulletin of the Seismological Society of America	regional landslide analysis	regional mapping|regional landslide descriptive statistics	usa_4	Northridge	1994-01-17 12:30:55UTC	USA
https://www.doi.org/10.3390/rs11192292	229	2019	Liu, Wen; Yamazaki, Fumio; Maruyama, Yoshihisa	Detection of Earthquake-Induced Landslides during the 2018 Kumamoto Earthquake Using Multitemporal Airborne Lidar Data	Remote Sensing	regional landslide analysis	regional mapping	jap_2	Kumamoto	2016-04-15 16:25:06UTC	Japan
https://www.doi.org/10.4294/jpe1952.45.83	230	1997	Fukuoka, Hiroshi; Sassa, Kyoji; Scarascia-Mugnozza, Gabriele	Distribution of Landslides Triggered by the 1995 Hyogo-ken Nanbu Earthquake and Long Runout Mechanism of the Takarazuka Golf Course Landslide	Journal of Physics of the Earth	regional landslide analysis|single landslide analysis	regional mapping|single failure geotechnical characterization	jap_3	Hyogo-ken Nanbu (Kobe)	1995-01-16 20:46:52UTC	Japan
https://www.doi.org/10.1130/0016-7606(1998)110<0060:LDOEGR>2.3.CO;2	231	1998	Bull, William B.; Brandon, Mark T.	Lichen dating of earthquake-generated regional rockfall events, Southern Alps, New Zealand	GSA Bulletin	Not Applicable	historical/Holocene landslides	Not Applicable	Not Applicable	Not Applicable	Not Applicable
https://www.doi.org/10.5194/nhess-20-2055-2020	232	2020	Poupardin, Adrien; Calais, Eric; Heinrich, Philippe; Hébert, Hélène; Rodriguez, Mathieu; Leroy, Sylvie; Aochi, Hideo; Douilly, Roby	Deep submarine landslide contribution to the 2010 Haiti earthquake tsunami	Natural Hazards and Earth System Sciences	Not Applicable	water environment landslides	hai_1	Haiti region	2010-01-12 21:53:10UTC	Haiti
https://www.doi.org/10.1023/A:1008041205256	233	1999	Ayonghe, S. N.; Mafany, G. T.; Ntasin, E.; Samalang, P.	Seismically Activated Swarm of Landslides, Tension Cracks, and a Rockfall after Heavy Rainfall in Bafaka, Cameroon	Natural Hazards	Not Applicable	Not Applicable	Not Applicable	Not Applicable	Not Applicable	Not Applicable
https://www.doi.org/10.2110/jsr.69.84	234	1999	Keefer, David K.	Earthquake-induced landslides and their effects on alluvial fans	Journal of Sedimentary Research	regional landslide analysis	regional landslide comparison	Not Applicable	Not Applicable	Not Applicable	Not Applicable
https://www.doi.org/10.1023/A:1006788808145	235	2000	Havevith, H.-B.; Jongmans, D.; Abdrakhmatov, K.; Trefois, P.; Delvaux, D.; Torgoev, I.A.	Geophysical Investigations Of Seismically Induced Surface Effects: Case Study Of A Landslide In The Suusamyr Valley, Kyrgyzstan	Surveys in Geophysics	single landslide analysis	single failure modelling	kyr_1	60 km ENE of Toktogul	1992-08-19 02:04:37UTC	Kyrgyzstan
https://www.doi.org/10.1016/S0264-3707(99)00056-3	236	2000	Vittori, E; Deiana, G; Esposito, E; Ferreli, L; Marchegiani, L; Mastrolorenzo, G; Michetti, A. M; Porfido, S; Serva, L; Simonelli, A. L; Tondi, E	Ground effects and surface faulting in the September–October 1997 Umbria–Marche (Central Italy) seismic sequence	Journal of Geodynamics	regional landslide analysis	regional mapping	ita_12	Umbria-Marche	1997-09-26 09:40:26UTC	Italy
https://www.doi.org/10.1007/s002549900097	237	2000	Al-Homoud, A. S.; Tahtamoni, W. W.	SARETL: an expert system for probabilistic displacement-based dynamic 3-D slope stability analysis and remediation of earthquake triggered landslides	Environmental Geology	single landslide analysis	single failure impact/risk modelling	Not Applicable	Not Applicable	Not Applicable	Not Applicable
https://www.doi.org/10.1080/02533839.2000.9670563	238	2000	Chen, Rong-Her; Liu, Chia-Nan; Chen, Kuo-Sheng; Chen, Tien-Jiang	Analysis of a reinforced slope failure induced by The Chi‐Chi (Taiwan) earthquake	Journal of the Chinese Institute of Engineers	single landslide analysis	single failure geotechnical characterization|single failure modelling	taiw_1	Chi Chi	1999-09-20 17:47:18UTC	Taiwan
https://www.doi.org/10.1016/S0267-7261(00)00063-4	239	2000	Luzi, L.; Pergalani, F.	A correlation between slope failures and accelerometric parameters: the 26 September 1997 earthquake (Umbria–Marche, Italy)	Soil Dynamics and Earthquake Engineering	regional landslide analysis	regional mapping	ita_12	Umbria-Marche	1997-09-26 09:40:26UTC	Italy
https://www.doi.org/10.1016/S0013-7952(00)00043-0	240	2000	Papadopoulos, Gerassimos A.; Plessa, Areti	Magnitude–distance relations for earthquake-induced landslides in Greece	Engineering Geology	regional landslide analysis	regional landslide comparison	Not Applicable	Not Applicable	Not Applicable	Not Applicable
https://www.doi.org/10.1016/S0013-7952(00)00035-1	241	2000	Esposito, Eliana; Porfido, Sabina; Simonelli, Armando L; Mastrolorenzo, Giuseppe; Iaccarino, Gianmaria	Landslides and other surface effects induced by the 1997 Umbria–Marche seismic sequence	Engineering Geology	regional landslide analysis	regional mapping	ita_12	Umbria-Marche	1997-09-26 09:40:26UTC	Italy
https://www.doi.org/10.1016/S0013-7952(00)00039-9	242	2000	Jibson, Randall W; Harp, Edwin L; Michael, John A	A method for producing digital probabilistic seismic landslide hazard maps	Engineering Geology	regional landslide analysis	regional susceptibility/hazard assessment	usa_4	Northridge	1994-01-17 12:30:55UTC	USA
https://www.doi.org/10.1023/A:1011158429996	243	2001	Al-Homoud, Azm S.; Tahtamoni, Wisam W.	A Reliability Based Expert System for Assessment and Mitigation of Landslides Hazard Under Seismic Loading	Natural Hazards	single landslide analysis	single failure impact/risk modelling	Not Applicable	Not Applicable	Not Applicable	Not Applicable
https://www.doi.org/10.1785/0120000719	244	2001	Huang, C.-C.; Lee, Y.-H.; Liu, Huaibao P.; Keefer, D.K.; Jibson, R.W.	Influence of surface-normal ground acceleration on the initiation of the Jih-Feng-Erh-Shan landslide during the 1999 Chi-Chi, Taiwan, earthquake	Bulletin of the Seismological Society of America	single landslide analysis	single failure modelling	taiw_1	Chi Chi	1999-09-20 17:47:18UTC	Taiwan
https://www.doi.org/10.1023/A:1021235029496	245	2002	Capolongo, Domenico; Refice, Alberto; Mankelow, Joseph	Evaluating Earthquake-Triggered Landslide Hazard at the Basin Scale Through Gis in the Upper Sele River Valley	Surveys in Geophysics	regional landslide analysis	regional susceptibility/hazard assessment	ita_1	Irpinia	1980-11-23 18:34:53UTC	Italy
https://www.doi.org/10.1016/S1040-6182(02)00019-8	246	2002	Weidinger, Johannes T.; Wang, Jiading; Ma, Naixi	The earthquake-triggered rock avalanche of Cui Hua, Qin Ling Mountains, P. R. of China—the benefits of a lake-damming prehistoric natural disaster	Quaternary International	Not Applicable	historical/Holocene landslides	Not Applicable	Not Applicable	Not Applicable	Not Applicable
https://www.doi.org/10.1007/s00267-001-0045-8	247	2002	Pantano, Francesca Gringeri; Nicoletti, Pier Giorgio; Parise, Mario	Historical and geological evidence for seismic origin of newly recognized landslides in southeastern Sicily, and its significance in terms of hazard	Environmental Management	Not Applicable	historical/Holocene landslides	Not Applicable	Not Applicable	Not Applicable	Not Applicable
https://www.doi.org/10.1016/S0098-3004(01)00104-2	248	2002	Refice, Alberto; Capolongo, Domenico	Probabilistic modeling of uncertainties in earthquake-induced landslide hazard assessment	Computers & Geosciences	regional landslide analysis	regional susceptibility/hazard assessment	ita_1	Irpinia	1980-11-23 18:34:53UTC	Italy
https://www.doi.org/10.3319/TAO.2002.13.3.387(CCE)	249	2002	Huang, Chien-Shui; Chen, Mien-Ming; Hsu, Ming-I	A Preliminary Report on the Chiufenershan Landslide Triggered by the 921 Chichi Earthquake in Nantou, Central Taiwan	Terrestrial, Atmospheric and Oceanic Sciences	single landslide analysis	single failure mapping	taiw_1	Chi Chi	1999-09-20 17:47:18UTC	Taiwan
https://www.doi.org/10.1007/s10064-018-1338-y	250	2019	Guo, Peng; Han, Zhu-jun; Ran, Hong-liu; Luo, Jia-hong; Wu, Guo; Yuan, Ren-mao	Co-seismic surface rupture of Papatea fault and reactivation mechanism of the Clarence landslide during the 2016 Mw7.8 Kaikoura earthquake, New Zealand	Bulletin of Engineering Geology and the Environment	single landslide analysis	single failure modelling	nze_1	Kaikōura	2016-11-14 00:34:22UTC	New Zealand
https://www.doi.org/10.1007/s10346-019-01187-7	251	2019	Wang, Fengrui; Fan, Xuanmei; Yunus, Ali P.; Siva Subramanian, Srikrishnan; Alonso-Rodriguez, Andres; Dai, Lanxin; Xu, Qiang; Huang, Runqiu	Coseismic landslides triggered by the 2018 Hokkaido, Japan (Mw 6.6), earthquake: spatial distribution, controlling factors, and possible failure mechanism	Landslides	regional landslide analysis	regional mapping|regional landslide descriptive statistics	jap_6	Hokkaido Eastern Iburi	2018-09-05 18:07:59UTC	Japan
https://www.doi.org/10.1144/qjegh2019-048	252	2020	Jones, J. N.; Stokes, M.; Boulton, S. J.; Bennett, G. L.; Whitworth, M. R. Z.	Coseismic and monsoon-triggered landslide impacts on remote trekking infrastructure, Langtang Valley, Nepal	Quarterly Journal of Engineering Geology and Hydrogeology	regional landslide analysis	regional mapping	nep_1|nep_2	Gorkha|Gorkha_2	2015-04-25 06:11:25UTC|2015-05-12 07:05:19UTC	Nepal|Nepal
https://www.doi.org/10.1007/s00367-002-0107-9	253	2002	Rao, Hanumantha Y.; Subrahmanyam, C.; Rastogi, A.; Deka, B.	Slope failures along the western continental margin of India: a consequence of gas-hydrate dissociation, rapid sedimentation rate, and seismic activity?	Geo-Marine Letters	Not Applicable	water environment landslides	Not Applicable	Not Applicable	Not Applicable	Not Applicable
https://www.doi.org/10.1785/0120010206	254	2002	Havenith, Hans-Balder; Jongmans, Denis; Faccioli, Ezio; Abdrakhmatov, Kanatbeck; Bard, Pierre-Yves	Site Effect Analysis around the Seismically Induced Ananevo Rockslide, Kyrgyzstan	Bulletin of the Seismological Society of America	single landslide analysis	single failure modelling|single failure geophysical characterization	kyr_2	Kemin	1911-01-03 23:25:48UTC	Kyrgyzstan
https://www.doi.org/10.1007/s11069-020-04315-y	255	2020	Hacıefendioğlu, Kemal; Başağa, Hasan Basri; Demir, Gökhan	Automatic detection of earthquake-induced ground failure effects through Faster R-CNN deep learning-based object detection using satellite images	Natural Hazards	regional landslide analysis	regional mapping	indo_1	Palu	2018-09-28 10:02:45UTC	Indonesia
https://www.doi.org/10.1002/esp.4601	256	2019	Chen, Yi‐Chin; Chang, Kang‐Tsung; Wang, Su‐Fen; Huang, Jr‐Chuan; Yu, Cheng‐Ku; Tu, Jien‐Yi; Chu, Hone‐Jay; Liu, Cheng‐Chien	Controls of preferential orientation of earthquake‐ and rainfall‐triggered landslides in Taiwan's orogenic mountain belt	Earth Surface Processes and Landforms	regional landslide analysis	regional landslide descriptive statistics	taiw_1	Chi Chi	1999-09-20 17:47:18UTC	Taiwan
https://www.doi.org/10.1007/s10346-020-01349-y	257	2020	Li, Ran; Wang, Fawu; Zhang, Shuai	Controlling role of Ta-d pumice on the coseismic landslides triggered by 2018 Hokkaido Eastern Iburi Earthquake	Landslides	single landslide analysis	single failure modelling|single failure geotechnical characterization	jap_6	Hokkaido Eastern Iburi	2018-09-05 18:07:59UTC	Japan
https://www.doi.org/10.1016/S0033-5894(02)00010-8	258	2003	Carrara, Paul E; O’Neill, J. Micheal	Tree-ring dated landslide movements and their relationship to seismic events in southwestern Montana, USA	Quaternary Research	Not Applicable	historical/Holocene landslides	Not Applicable	Not Applicable	Not Applicable	Not Applicable
https://www.doi.org/10.5194/nhess-3-663-2003	259	2003	Havenith, H.-B.; Strom, A.; Calvetti, F.; Jongmans, D.	Seismic triggering of landslides. Part B: Simulation of dynamic failure processes	Natural Hazards and Earth System Sciences	single landslide analysis	single landslide comparison|single failure modelling	kyr_1|kyr_2	60 km ENE of Toktogul|Kemin	1992-08-19 02:04:37UTC|1911-01-03 23:25:48UTC	Kyrgyzstan|Kyrgyzstan
https://www.doi.org/10.5194/nhess-3-135-2003	260	2003	Havenith, H.-B.; Strom, A.; Jongmans, D.; Abdrakhmatov, A.; Delvaux, D.; Tréfois, P.	Seismic triggering of landslides, Part A: Field evidence from the Northern Tien Shan	Natural Hazards and Earth System Sciences	single landslide analysis	single landslide comparison|single failure modelling	Not Applicable	Not Applicable	Not Applicable	Not Applicable
https://www.doi.org/10.1186/BF03352478	261	2003	Papadopoulos, Gerassimos A.; Karastathis, Vassilios K.; Ganas, Athanassios; Pavlides, Spyros; Fokaefs, Anna; Orfanogiannaki, Katerina	The Lefkada, Sea (Greece), shock (Mw 6.2) of 14 August 2003: Evidence for the characteristic earthquake from seismicity and ground failures	Earth, Planets and Space	regional landslide analysis	regional mapping	gre_1	Lefkada Ionian Islands (Greece-Albania border region)	2003-08-14 05:14:54UTC	Greece
https://www.doi.org/10.1016/j.enggeo.2019.105331	262	2020	Hakan, Tanyas; Luigi, Lombardo	Completeness Index for Earthquake-Induced Landslide Inventories	Engineering Geology	regional landslide analysis	regional landslide comparison	Not Applicable	Not Applicable	Not Applicable	Not Applicable
https://www.doi.org/10.1016/S0013-7952(02)00232-6	263	2003	Chigira, Masahiro; Wang, Wen-Neng; Furuya, Takahiko; Kamai, Toshitaka	Geological causes and geomorphological precursors of the Tsaoling landslide triggered by the 1999 Chi-Chi earthquake, Taiwan	Engineering Geology	single landslide analysis	single failure geotechnical characterization	taiw_1	Chi Chi	1999-09-20 17:47:18UTC	Taiwan
https://www.doi.org/10.1029/2018JB016986	264	2019	Li, Gen; West, A. Joshua; Qiu, Hongrui	Competing Effects of Mountain Uplift and Landslide Erosion Over Earthquake Cycles	Journal of Geophysical Research: Solid Earth	Not Applicable	Landscape evolution	chin_1	Wenchuan-Sichuan	2008-05-12 06:28:01UTC	China
https://www.doi.org/10.1016/S0013-7952(02)00230-2	265	2003	Shou, Keh-Jian; Wang, Cheng-Fung	Analysis of the Chiufengershan landslide triggered by the 1999 Chi-Chi earthquake in Taiwan	Engineering Geology	single landslide analysis	single failure modelling	taiw_1	Chi Chi	1999-09-20 17:47:18UTC	Taiwan
https://www.doi.org/10.1016/S0013-7952(02)00277-6	266	2003	Carro, M.; De Amicis, M.; Luzi, L.; Marzorati, S.	The application of predictive modeling techniques to landslides induced by earthquakes: the case study of the 26 September 1997 Umbria–Marche earthquake (Italy)	Engineering Geology	regional landslide analysis	regional susceptibility/hazard assessment	ita_12	Umbria-Marche	1997-09-26 09:40:26UTC	Italy
https://www.doi.org/10.1016/S0013-7952(02)00244-2	267	2003	Wang, Wen-Neng; Chigira, Masahiro; Furuya, Takahiko	Geological and geomorphological precursors of the Chiu-fen-erh-shan landslide triggered by the Chi-chi earthquake in central Taiwan	Engineering Geology	single landslide analysis	single failure geotechnical characterization	taiw_1	Chi Chi	1999-09-20 17:47:18UTC	Taiwan
https://www.doi.org/10.1023/A:1024534105559	268	2003	Havenith, H.-B.; Vanini, M.; Jongmans, D.; Faccioli, E.	Initiation of earthquake-induced slope failure: influence of topographical and other site specific amplification effects	Journal of Seismology	single landslide analysis	single failure modelling	kyr_2	Kemin	1911-01-03 23:25:48UTC	Kyrgyzstan
https://www.doi.org/10.1007/s00024-003-2414-0	269	2003	Matsumoto, Takeshi; Tappin, David R.; SOS Onboard Scientific Party	Possible Coseismic Large-scale Landslide off the Northern Coast of Papua New Guinea in July 1998: Geophysical and Geological Results from SOS Cruises	Pure and Applied Geophysics	Not Applicable	water environment landslides	png_2	50 km WNW of Aitape	1998-07-17 08:49:13UTC	Papua New Guinea
https://www.doi.org/10.4401/ag-3451	270	2003	Bull, W. B.	Lichenometry dating of coseismic changes to a New Zealand landslide complex	Annals of Geophysics	Not Applicable	historical/Holocene landslides	Not Applicable	Not Applicable	Not Applicable	Not Applicable
https://www.doi.org/10.1029/2003JF000037	271	2003	Czuchlewski, Kristina R.; Weissel, Jeffrey K.; Kim, Yunjin	Polarimetric synthetic aperture radar study of the Tsaoling landslide generated by the 1999 Chi-Chi earthquake, Taiwan	Journal of Geophysical Research: Earth Surface	single landslide analysis	single failure mapping	taiw_1	Chi Chi	1999-09-20 17:47:18UTC	Taiwan
https://www.doi.org/10.1130/0-8137-2375-2.69	272	2004	Jibson, Randall W.; Crone, Anthony J.; Harp, Edwin L.; Baum, Rex L.; Major, Jon J.; Pullinger, Carlos R.; Escobar, C. Demetrio; Martínez, Mauricio; Smith, Mark E.	Landslides triggered by the 13 January and 13 February 2001 earthquakes in El Salvador	Natural Hazards in El Salvador (Book)	regional landslide analysis	regional mapping	elsa_1|elsa_2	El salvador 2001_1|El salvador 2001_2	2001-01-13 17:33:32UTC|2001-02-13 14:22:05UTC	El Salvador|El Salvador
https://www.doi.org/10.1130/0-8137-2375-2.25	273	2004	Evans, Stephen G.; Bent, Allison L.	The Las Colinas landslide, Santa Tecla: A highly destructive flowslide triggered by the January 13, 2001, El Salvador earthquake	Natural Hazards in El Salvador (Book)	single landslide analysis	single failure mapping|single failure modelling	elsa_1	El salvador 2001_1	2001-01-13 17:33:32UTC	El Salvador
https://www.doi.org/10.1007/s10346-020-01464-w	274	2020	Livio, Franz; Ferrario, Maria Francesca	Assessment of attenuation regressions for earthquake-triggered landslides in the Italian Apennines: insights from recent and historical events	Landslides	regional landslide analysis	regional landslide comparison|regional landslide descriptive statistics	Not Applicable	Not Applicable	Not Applicable	Not Applicable
https://www.doi.org/10.3390/geosciences9080350	275	2019	Polykretis, Christos; Kalogeropoulos, Kleomenis; Andreopoulos, Panagiotis; Faka, Antigoni; Tsatsaris, Andreas; Chalkias, Christos	Comparison of Statistical Analysis Models for Susceptibility Assessment of Earthquake-Triggered Landslides: A Case Study from 2015 Earthquake in Lefkada Island	Geosciences	regional landslide analysis	regional susceptibility/hazard assessment	gre_2	10km WSW of Nidri	2015-11-17 07:10:07UTC	Greece
https://www.doi.org/10.1142/S1363246904001432	276	2004	MURPHY, WILLIAM; MANKELOW, JOSEPH M.	Obtaining Probabilistic Estimates of Displacement on a Landslide During Future Earthquakes	Journal of Earthquake Engineering	single landslide analysis	single failure modelling	usa_7	Loma Prieta, California Earthquake	1989-10-18 00:04:15UTC	USA
https://www.doi.org/10.3390/geosciences9100437	277	2019	Meena; Tavakkoli Piralilou	Comparison of Earthquake-Triggered Landslide Inventories: A Case Study of the 2015 Gorkha Earthquake, Nepal	Geosciences	regional landslide analysis	regional landslide comparison	nep_1|nep_2	Gorkha|Gorkha_2	2015-04-25 06:11:25UTC|2015-05-12 07:05:19UTC	Nepal|Nepal
https://www.doi.org/10.1007/s10346-015-0641-y	278	2015	Xiaoli, Chen; Qing, Zhou; Chunguo, Liu	Distribution pattern of coseismic landslides triggered by the 2014 Ludian, Yunnan, China Mw6.1 earthquake: special controlling conditions of local topography	Landslides	regional landslide analysis	regional landslide descriptive statistics	chin_5	Wenping (Ludian county)	2014-08-03 08:30:13UTC	China
https://www.doi.org/10.1007/s10346-016-0707-5	279	2017	Xing, Aiguo; Yuan, Xiaoyi; Xu, Qiang; Zhao, Qihua; Huang, Heqing; Cheng, Qiangong	Characteristics and numerical runout modelling of a catastrophic rock avalanche triggered by the Wenchuan earthquake in the Wenjia valley, Mianzhu, Sichuan, China	Landslides	single landslide analysis	single failure modelling	chin_1	Wenchuan-Sichuan	2008-05-12 06:28:01UTC	China
https://www.doi.org/10.1016/j.enggeo.2014.12.004	280	2015	Tang, Chuan; Ma, Guochao; Chang, Ming; Li, Weile; Zhang, Dandan; Jia, Tao; Zhou, Zhiyuan	Landslides triggered by the 20 April 2013 Lushan earthquake, Sichuan Province, China	Engineering Geology	regional landslide analysis	regional mapping|regional landslide descriptive statistics	chin_2	Lushan	2013-04-20 00:02:47UTC	China
https://www.doi.org/10.1007/s12665-015-4773-0	281	2016	Xu, Qiang; Li, Yanrong; Zhang, Shuai; Dong, Xiujun	Classification of large-scale landslides induced by the 2008 Wenchuan earthquake, China	Environmental Earth Sciences	single landslide analysis	single landslide comparison	chin_1	Wenchuan-Sichuan	2008-05-12 06:28:01UTC	China
https://www.doi.org/10.1080/19475705.2015.1075162	282	2016	Zhou, Jia-Wen; Lu, Peng-Yuan; Hao, Ming-Hui	Landslides triggered by the 3 August 2014 Ludian earthquake in China: geological properties, geomorphologic characteristics and spatial distribution analysis	Geomatics, Natural Hazards and Risk	regional landslide analysis	regional mapping|regional landslide descriptive statistics	chin_5	Wenping (Ludian county)	2014-08-03 08:30:13UTC	China
https://www.doi.org/10.1186/s40623-016-0423-3	283	2016	Lacroix, Pascal	Landslides triggered by the Gorkha earthquake in the Langtang valley, volumes and initiation processes	Earth, Planets and Space	regional landslide analysis	regional mapping|regional landslide descriptive statistics	nep_1	Gorkha	2015-04-25 06:11:25UTC	Nepal
https://www.doi.org/10.5194/nhess-14-1257-2014	284	2014	Chen, X. L.; Yu, L.; Wang, M. M.; Lin, C. X.; Liu, C. G.; Li, J. Y.	Brief Communication: Landslides triggered by the Ms=7.0 Lushan earthquake, China	Natural Hazards and Earth System Sciences	regional landslide analysis	regional mapping|regional landslide descriptive statistics	chin_2	Lushan	2013-04-20 00:02:47UTC	China
https://www.doi.org/10.5194/nhess-14-1195-2014	285	2014	Yuan, R.-M.; Tang, C.-L.; Hu, J.-C.; Xu, X.-W.	Mechanism of the Donghekou landslide triggered by the 2008 Wenchuan earthquake revealed by discrete element modeling	Natural Hazards and Earth System Sciences	single landslide analysis	single failure modelling	chin_1	Wenchuan-Sichuan	2008-05-12 06:28:01UTC	China
https://www.doi.org/10.1080/14498596.2014.913509	286	2014	Heron, D.; Lukovic, B.; Massey, C.; Ries, W.; McSaveney, M.	GIS modelling in support of earthquake-induced rockfall and cliff collapse risk assessment in the Port Hills, Christchurch	Journal of Spatial Science	regional landslide analysis|single landslide analysis	single failure modelling|regional susceptibility/hazard assessment|regional risk modelling	nze_2	Christchurch	2011-02-21 23:51:42UTC	New Zealand
https://www.doi.org/10.5194/nhess-14-3175-2014	287	2014	Bottelin, P.; Jongmans, D.; Daudon, D.; Mathy, A.; Helmstetter, A.; Bonilla-Sierra, V.; Cadet, H.; Amitrano, D.; Richefeu, V.; Lorier, L.; Baillet, L.; Villard, P.; Donzé, F.	Seismic and mechanical studies of the artificially triggered rockfall at Mount Néron (French Alps, December 2011)	Natural Hazards and Earth System Sciences	Not Applicable	Not Applicable	Not Applicable	Not Applicable	Not Applicable	Not Applicable
https://www.doi.org/10.1193/021413EQS026M	288	2014	Massey, Chris I.; McSaveney, Mauri J.; Taig, Tony; Richards, Laurie; Litchfield, Nicola J.; Rhoades, David A.; McVerry, Graeme H.; Lukovic, Biljana; Heron, David W.; Ries, William; Van Dissen, Russ J.	Determining Rockfall Risk in Christchurch Using Rockfalls Triggered by the 2010–2011 Canterbury Earthquake Sequence	Earthquake Spectra	regional landslide analysis|single landslide analysis	regional landslide descriptive statistics|regional susceptibility/hazard assessment|regional risk modelling|single failure modelling	nze_2	Christchurch	2011-02-21 23:51:42UTC	New Zealand
https://www.doi.org/10.1007/s12524-013-0306-z	289	2014	James, Naveen; Sitharam, T. G.	Assessment of Seismically Induced Landslide Hazard for the State of Karnataka Using GIS Technique	Journal of the Indian Society of Remote Sensing	regional landslide analysis	regional susceptibility/hazard assessment	Not Applicable	Not Applicable	Not Applicable	Not Applicable
https://www.doi.org/10.1016/j.geomorph.2013.11.009	290	2014	Wang, Gonghui; Suemine, Akira; Zhang, Fanyu; Hata, Yoshiya; Fukuoka, Hiroshi; Kamai, Toshitaka	Some fluidized landslides triggered by the 2011 Tohoku Earthquake (Mw 9.0), Japan	Geomorphology	regional landslide analysis|single landslide analysis	regional mapping|single failure geotechnical characterization	jap_5	Eastern Honshu (Great Tohoku Earthquake)	2011-03-11 05:46:24UTC	Japan
https://www.doi.org/10.1016/j.enggeo.2013.11.018	291	2014	Chen, Tien Chien; Lin, Meei Ling; Wang, Kuo Lung	Landslide seismic signal recognition and mobility for an earthquake-induced rockslide in Tsaoling, Taiwan	Engineering Geology	single landslide analysis	single failure modelling	taiw_1	Chi Chi	1999-09-20 17:47:18UTC	Taiwan
https://www.doi.org/10.1002/2013GL059169	292	2014	Togo, Tetsuhiro; Shimamoto, Toshihiko; Dong, Jia-Jyun; Lee, Chyi-Tyi; Yang, Che-Ming	Triggering and runaway processes of catastrophic Tsaoling landslide induced by the 1999 Taiwan Chi-Chi earthquake, as revealed by high-velocity friction experiments: HV friction exp. on Tsaoling landslide	Geophysical Research Letters	single landslide analysis	single failure modelling|single failure geotechnical characterization	taiw_1	Chi Chi	1999-09-20 17:47:18UTC	Taiwan
https://www.doi.org/10.1002/2013GC005067	293	2014	Li, Gen; West, A. Joshua; Densmore, Alexander L.; Jin, Zhangdong; Parker, Robert N.; Hilton, Robert G.	Seismic mountain building: Landslides associated with the 2008 Wenchuan earthquake in the context of a generalized model for earthquake volume balance: THE WENCHUAN COSEISMIC LANDSLIDE	Geochemistry, Geophysics, Geosystems	regional landslide analysis	regional mapping|regional landslide descriptive statistics	chin_1	Wenchuan-Sichuan	2008-05-12 06:28:01UTC	China
https://www.doi.org/10.1007/s10346-013-0444-y	294	2014	Guo, Deping; Hamada, Masanori; He, Chuan; Wang, Yufeng; Zou, Yulin	An empirical model for landslide travel distance prediction in Wenchuan earthquake area	Landslides	regional landslide analysis	regional susceptibility/hazard assessment	chin_1	Wenchuan-Sichuan	2008-05-12 06:28:01UTC	China
https://www.doi.org/10.1007/s11629-013-2970-4	295	2014	Wei, Xue-li; Chen, Ning-sheng; Cheng, Qian-gong; He, Na; Deng, Ming-feng; Tanoli, Javed Iqbal	Long-term activity of earthquake-induced landslides: A case study from Qionghai Lake Basin, Southwest of China	Journal of Mountain Science	Not Applicable	historical/Holocene landslides	chin_10	Xichang	1850-12-09	China
https://www.doi.org/10.1016/j.enggeo.2014.03.006	296	2014	Wang, Gonghui; Zhang, Dexuan; Furuya, Gen; Yang, Jun	Pore-pressure generation and fluidization in a loess landslide triggered by the 1920 Haiyuan earthquake, China: A case study	Engineering Geology	single landslide analysis	single failure mapping|single failure geotechnical characterization	chin_4	Haiyuan	1920-12-16 12:05:55UTC	China
https://www.doi.org/10.1007/s13753-014-0020-7	297	2014	Wang, Ming; Liu, Min; Yang, Saini; Shi, Peijun	Incorporating Triggering and Environmental Factors in the Analysis of Earthquake-Induced Landslide Hazards	International Journal of Disaster Risk Science	regional landslide analysis	regional susceptibility/hazard assessment	chin_1	Wenchuan-Sichuan	2008-05-12 06:28:01UTC	China
https://www.doi.org/10.1007/s11069-014-1038-2	298	2014	Xu, Chong; Xu, Xiwei	Statistical analysis of landslides caused by the Mw 6.9 Yushu, China, earthquake of April 14, 2010	Natural Hazards	regional landslide analysis	regional mapping|regional landslide descriptive statistics	chin_6	Yushu (southern Qinghai)	2010-04-13 23:49:38UTC	China
https://www.doi.org/10.1007/s12517-013-1020-4	299	2014	Xu, Chong; Xu, Xiwei; Pourghasemi, Hamid Reza; Pradhan, Biswajeet; Iqbal, Javed	Volume, gravitational potential energy reduction, and regional centroid position change in the wake of landslides triggered by the 14 April 2010 Yushu earthquake of China	Arabian Journal of Geosciences	regional landslide analysis	regional susceptibility/hazard assessment	chin_6	Yushu (southern Qinghai)	2010-04-13 23:49:38UTC	China
https://www.doi.org/10.1007/s10346-013-0404-6	300	2014	Xu, Chong; Xu, Xiwei; Yao, Xin; Dai, Fuchu	Three (nearly) complete inventories of landslides triggered by the May 12, 2008 Wenchuan Mw 7.9 earthquake of China and their spatial distribution statistical analysis	Landslides	regional landslide analysis	regional mapping|regional landslide descriptive statistics	chin_1	Wenchuan-Sichuan	2008-05-12 06:28:01UTC	China
https://www.doi.org/10.1016/j.catena.2014.02.005	301	2014	Umar, Zahrul; Pradhan, Biswajeet; Ahmad, Anuar; Jebur, Mustafa Neamah; Tehrany, Mahyat Shafapour	Earthquake induced landslide susceptibility mapping using an integrated ensemble frequency ratio and logistic regression models in West Sumatera Province, Indonesia	Catena	regional landslide analysis	regional susceptibility/hazard assessment	indo_2	30 km WSW of Pariaman	2009-09-30 10:16:09UTC	Indonesia
https://www.doi.org/10.1016/j.geomorph.2014.03.029	302	2014	Xu, Chong	Do buried-rupture earthquakes trigger less landslides than surface-rupture earthquakes for reverse faults?	Geomorphology	regional landslide analysis	regional landslide comparison	Not Applicable	Not Applicable	Not Applicable	Not Applicable
https://www.doi.org/10.1016/j.geomorph.2014.04.011	303	2014	Chen, Xiao-Li; Liu, Chun-Guo; Yu, Lu; Lin, Chuan-Xiang	Critical acceleration as a criterion in seismic landslide susceptibility assessment	Geomorphology	regional landslide analysis	regional susceptibility/hazard assessment	chin_1	Wenchuan-Sichuan	2008-05-12 06:28:01UTC	China
https://www.doi.org/10.4408/IJEGE.2017-01.O-04	304	2017	Martino, Salvatore	Earthquake-induced landslides in Italy: from the distribution of effects to the hazard mapping	Italian Journal of Engineering Geology and Environment	regional landslide analysis	regional landslide comparison	Not Applicable	Not Applicable	Not Applicable	Not Applicable
https://www.doi.org/10.1007/s10346-016-0763-x	305	2017	Martha, Tapas R.; Roy, Priyom; Mazumdar, Ritwik; Govindharaj, K. Babu; Kumar, K. Vinod	Spatial characteristics of landslides triggered by the 2015 Mw 7.8 (Gorkha) and Mw 7.3 (Dolakha) earthquakes in Nepal	Landslides	regional landslide analysis	regional mapping|regional landslide descriptive statistics	nep_1|nep_2	Gorkha|Gorkha_2	2015-04-25 06:11:25UTC|2015-05-12 07:05:19UTC	Nepal|Nepal
https://www.doi.org/10.1109/JSTARS.2017.2661802	306	2017	Zhao, Wei; Li, Ainong; Nan, Xi; Zhang, Zhengjian; Lei, Guangbin	Postearthquake Landslides Mapping From Landsat-8 Data for the 2015 Nepal Earthquake Using a Pixel-Based Change Detection Method	IEEE Journal of Selected Topics in Applied Earth Observations and Remote Sensing	regional landslide analysis	regional mapping	nep_1|nep_2	Gorkha|Gorkha_2	2015-04-25 06:11:25UTC|2015-05-12 07:05:19UTC	Nepal|Nepal
https://www.doi.org/10.5459/bnzsee.50.2.106-116	307	2017	Dellow, Sally; Massey, Chris; Cox, Simon; Archibald, Garth; Begg, John; Bruce, Zane; Carey, Jon; Davidson, Jonathan; Pasqua, Fernando Della; Glassey, Phil; Hill, Matt; Jones, Katie; Lyndsell, Barbara; Lukovic, Biljana; McColl, Sam; Rattenbury, Mark; Read, Stuart; Rosser, Brenda; Singeisen, Corinne; Townsend, Dougal; Villamor, Pilar; Villeneuve, Marlene; Godt, Jonathan; Jibson, Randall; Allstadt, …	Landslides caused by the Mw7.8 Kaikōura earthquake and the immediate response	Bulletin of the New Zealand Society for Earthquake Engineering	regional landslide analysis	regional mapping	nze_1	Kaikōura	2016-11-14 00:34:22UTC	New Zealand
https://www.doi.org/10.1007/s10346-017-0841-8	308	2017	Romeo, Saverio; Di Matteo, Lucio; Melelli, Laura; Cencetti, Corrado; Dragoni, Walter; Fredduzzi, Andrea	Seismic-induced rockfalls and landslide dam following the October 30, 2016 earthquake in Central Italy	Landslides	regional landslide analysis	regional mapping	ita_6	Norcia	2016-10-30 06:40:18UTC	Italy
https://www.doi.org/10.1007/s10346-016-0789-0	309	2017	Tiwari, Binod; Ajmera, Beena; Dhital, Smriti	Characteristics of moderate- to large-scale landslides triggered by the M w 7.8 2015 Gorkha earthquake and its aftershocks	Landslides	regional landslide analysis	regional mapping|regional landslide descriptive statistics	nep_1|nep_2	Gorkha|Gorkha_2	2015-04-25 06:11:25UTC|2015-05-12 07:05:19UTC	Nepal|Nepal
https://www.doi.org/10.1007/s11629-016-4140-y	310	2017	Guo, Chen-wen; Huang, Yi-dan; Yao, Ling-kan; Alradi, Helal	Size and spatial distribution of landslides induced by the 2015 Gorkha earthquake in the Bhote Koshi river watershed	Journal of Mountain Science	regional landslide analysis	regional mapping|regional landslide descriptive statistics	nep_1|nep_2	Gorkha|Gorkha_2	2015-04-25 06:11:25UTC|2015-05-12 07:05:19UTC	Nepal|Nepal
https://www.doi.org/10.1016/j.geomorph.2017.07.010	311	2017	Caccavale, Mauro; Matano, Fabio; Sacchi, Marco	An integrated approach to earthquake-induced landslide hazard zoning based on probabilistic seismic scenario for Phlegrean Islands (Ischia, Procida and Vivara), Italy	Geomorphology	regional landslide analysis	regional susceptibility/hazard assessment	Not Applicable	Not Applicable	Not Applicable	Not Applicable
https://www.doi.org/10.1007/s10064-016-0949-4	312	2017	Sun, Ping; Li, Rongjian; Jiang, Hao; Igwe, Ogbonnaya; Shi, Jusong	Earthquake-triggered landslides by the 1718 Tongwei earthquake in Gansu Province, northwest China	Bulletin of Engineering Geology and the Environment	Not Applicable	historical/Holocene landslides	chin_11	Tongwei	1718-06-19	China
https://www.doi.org/10.1007/s10346-017-0873-0	313	2017	Nonomura, Atsuko; Hasegawa, Shuichi	Susceptibility of slopes to earthquake-induced landslides: a new index derived from helicopter-borne electromagnetic resistivity and digital elevation data sets	Landslides	Not Applicable	historical/Holocene landslides	jap_9	Hoei earthquake (M8.6)	1707-10-28	Japan
https://www.doi.org/10.1007/s10346-017-0835-6	314	2017	Tian, Yingying; Xu, Chong; Chen, Jian; Zhou, Qing; Shen, Lingling	Geometrical characteristics of earthquake-induced landslides and correlations with control factors: a case study of the 2013 Minxian, Gansu, China, Mw 5.9 event	Landslides	regional landslide analysis	regional mapping|regional landslide descriptive statistics	chin_3	Minxian-Zhangxian	2013-07-21 23:45:56UTC	China
https://www.doi.org/10.1007/s10346-017-0833-8	315	2017	Shinoda, Masahiro; Miyata, Yoshihisa	Regional landslide susceptibility following the Mid NIIGATA prefecture earthquake in 2004 with NEWMARK’S sliding block analysis	Landslides	regional landslide analysis	regional susceptibility/hazard assessment	jap_1	Niigata-Chuetsu	2004-10-23 08:56:00UTC	Japan
https://www.doi.org/10.1007/s10346-017-0819-6	316	2017	Bandara, Surangani; Ohtsuka, Satoru	Spatial distribution of landslides induced by the 2004 Mid-Niigata prefecture earthquake, Japan	Landslides	regional landslide analysis	regional mapping|regional landslide descriptive statistics	jap_1	Niigata-Chuetsu	2004-10-23 08:56:00UTC	Japan
https://www.doi.org/10.1007/s10346-017-0905-9	317	2018	Bojadjieva, Julijana; Sheshov, Vlatko; Bonnard, Christophe	Hazard and risk assessment of earthquake-induced landslides—case study	Landslides	regional landslide analysis	regional susceptibility/hazard assessment	rmac_1	0 km NE of Krušopek	1963-07-26 04:17:17UTC	Republic of Macedonia
https://www.doi.org/10.3390/geosciences8020057	318	2018	Martino, Salvatore; Battaglia, Simona; Delgado, Josè; Esposito, Carlo; Martini, Guido; Missori, Cristina	Probabilistic Approach to Provide Scenarios of Earthquake-Induced Slope Failures (PARSIFAL) Applied to the Alcoy Basin (South Spain)	Geosciences	regional landslide analysis	regional susceptibility/hazard assessment	Not Applicable	Not Applicable	Not Applicable	Not Applicable
https://www.doi.org/10.1061/(ASCE)GT.1943-5606.0001842	319	2018	Tiwari, Binod; Pradel, Daniel; Ajmera, Beena; Yamashiro, Brian; Khadka, Diwakar	Landslide Movement at Lokanthali during the 2015 Earthquake in Gorkha, Nepal	Journal of Geotechnical and Geoenvironmental Engineering	single landslide analysis	single failure modelling	nep_1	Gorkha	2015-04-25 06:11:25UTC	Nepal
https://www.doi.org/10.1007/s10346-017-0929-1	320	2018	Xu, Chong; Ma, Siyuan; Tan, Zhibiao; Xie, Chao; Toda, Shinji; Huang, Xueqiang	Landslides triggered by the 2016 Mj 7.3 Kumamoto, Japan, earthquake	Landslides	regional landslide analysis	regional mapping|regional landslide descriptive statistics	jap_2	Kumamoto	2016-04-15 16:25:06UTC	Japan
https://www.doi.org/10.1007/s10706-017-0395-5	321	2017	Khodashahi, Maryam; Rahimi, Ebrahim; Bagheri, Vahid	Earthquake-Induced Landslides Hazard Zonation of Rudbar-Manjil Using CAMEL Model	Geotechnical and Geological Engineering	regional landslide analysis	regional susceptibility/hazard assessment	ira_2	Rudbar–Manjil	1990-06-20 21:00:09UTC	Iran
https://www.doi.org/10.1007/s12524-017-0720-8	322	2018	Sharma, Kanika; Saraf, Arun K.; Das, Josodhir; Baral, Suman S.; Borgohain, Susanta; Singh, Gaurav	Mapping and Change Detection Study of Nepal-2015 Earthquake Induced Landslides	Journal of the Indian Society of Remote Sensing	regional landslide analysis	regional mapping	nep_1	Gorkha	2015-04-25 06:11:25UTC	Nepal
https://www.doi.org/10.1007/s12040-018-0936-1	323	2018	Shrestha, Suchita; Kang, Tae-Seob; Choi, Jung Chang	Assessment of co-seismic landslide susceptibility using LR and ANCOVA in Barpak region, Nepal	Journal of Earth System Science	regional landslide analysis	regional susceptibility/hazard assessment	nep_1	Gorkha	2015-04-25 06:11:25UTC	Nepal
https://www.doi.org/10.1007/s10346-017-0899-3	324	2018	Cui, Shenghua; Pei, Xiangjun; Huang, Runqiu	Effects of geological and tectonic characteristics on the earthquake-triggered Daguangbao landslide, China	Landslides	single landslide analysis	single failure geotechnical characterization	chin_1	Wenchuan-Sichuan	2008-05-12 06:28:01UTC	China
https://www.doi.org/10.1007/s10346-017-0913-9	325	2018	Tsou, Ching-Ying; Chigira, Masahiro; Higaki, Daisuke; Sato, Go; Yagi, Hiroshi; Sato, Hiroshi P.; Wakai, Akihiko; Dangol, Vishnu; Amatya, Shanmukhesh C.; Yatagai, Akiyo	Topographic and geologic controls on landslides induced by the 2015 Gorkha earthquake and its aftershocks: an example from the Trishuli Valley, central Nepal	Landslides	regional landslide analysis	regional mapping|regional landslide descriptive statistics	nep_1	Gorkha	2015-04-25 06:11:25UTC	Nepal
https://www.doi.org/10.1007/s10346-018-0960-x	326	2018	Fan, Xuanmei; Scaringi, Gianvito; Xu, Qiang; Zhan, Weiwei; Dai, Lanxin; Li, Yusheng; Pei, Xiangjun; Yang, Qin; Huang, Runqiu	Coseismic landslides triggered by the 8th August 2017 Ms 7.0 Jiuzhaigou earthquake (Sichuan, China): factors controlling their spatial distribution and implications for the seismogenic blind fault identification	Landslides	regional landslide analysis	regional landslide descriptive statistics	chin_8	Jiuzhaigou County, Sichuan Province	2017-08-08 13:19:49UTC	China
https://www.doi.org/10.1007/s12665-018-7598-9	327	2018	Grendas, N.; Marinos, V.; Papathanassiou, G.; Ganas, A.; Valkaniotis, S.	Engineering geological mapping of earthquake-induced landslides in South Lefkada Island, Greece: evaluation of the type and characteristics of the slope failures	Environmental Earth Sciences	regional landslide analysis	regional landslide descriptive statistics|regional susceptibility/hazard assessment	gre_2	10km WSW of Nidri	2015-11-17 07:10:07UTC	Greece
https://www.doi.org/10.1016/j.jseaes.2018.03.010	328	2018	Chen, Xiao-li; Liu, Chun-guo; Wang, Ming-ming; Zhou, Qing	Causes of unusual distribution of coseismic landslides triggered by the Mw 6.1 2014 Ludian, Yunnan, China earthquake	Journal of Asian Earth Sciences	regional landslide analysis	regional susceptibility/hazard assessment	chin_5	Wenping (Ludian county)	2014-08-03 08:30:13UTC	China
https://www.doi.org/10.1785/0120170234	329	2018	Robinson, Tom R.; Rosser, Nick J.; Davies, Tim R.H.; Wilson, Thomas M.; Orchiston, Caroline	Near‐Real‐Time Modeling of Landslide Impacts to Inform Rapid Response: An Example from the 2016 Kaikōura, New Zealand, Earthquake	Bulletin of the Seismological Society of America	regional landslide analysis	regional susceptibility/hazard assessment|regional risk modelling	nze_1	Kaikōura	2016-11-14 00:34:22UTC	New Zealand
https://www.doi.org/10.1785/0120170297	330	2018	Allstadt, Kate E.; Jibson, Randall W.; Thompson, Eric M.; Massey, Chris I.; Wald, David J.; Godt, Jonathan W.; Rengers, Francis K.	Improving Near‐Real‐Time Coseismic Landslide Models: Lessons Learned from the 2016 Kaikōura, New Zealand, Earthquake	Bulletin of the Seismological Society of America	regional landslide analysis	regional susceptibility/hazard assessment	nze_1	Kaikōura	2016-11-14 00:34:22UTC	New Zealand
https://www.doi.org/10.1785/0120170305	331	2018	Massey, C.; Townsend, D.; Rathje, E.; Allstadt, K. E.; Lukovic, B.; Kaneko, Y.; Bradley, B.; Wartman, J.; Jibson, R. W.; Petley, D. N.; Horspool, N.; Hamling, I.; Carey, J.; Cox, S.; Davidson, J.; Dellow, S.; Godt, J. W.; Holden, C.; Jones, K.; Kaiser, A.; Little, M.; Lyndsell, B.; McColl, S.; Morgenstern, R.; Rengers, F. K.; Rhoades, D.; Rosser, B.; Strong, D.; Singeisen, C.; Villeneuve, M.	Landslides Triggered by the 14 November 2016 Mw 7.8 Kaikōura Earthquake, New Zealand	Bulletin of the Seismological Society of America	regional landslide analysis	regional mapping|regional landslide descriptive statistics|regional susceptibility/hazard assessment	nze_2	Kaikōura	2016-11-14 00:34:22UTC	New Zealand
https://www.doi.org/10.1007/s11629-018-4823-7	332	2018	Wang, Jiao; Jin, Wen; Cui, Yi-fei; Zhang, Wei-feng; Wu, Chun-hao; Alessandro, Pasuto	Earthquake-triggered landslides affecting a UNESCO Natural Site: the 2017 Jiuzhaigou Earthquake in the World National Park, China	Journal of Mountain Science	regional landslide analysis	regional mapping|regional landslide descriptive statistics	chin_8	Jiuzhaigou County, Sichuan Province	2017-08-08 13:19:49UTC	China
https://www.doi.org/10.1007/s10346-013-0419-z	333	2014	Yamasaki, Shintaro; Nagata, Hidehisa; Kawaguchi, Takayuki	Long-traveling landslides in deep snow conditions induced by the 2011 Nagano Prefecture earthquake, Japan	Landslides	single landslide analysis	single failure modelling	jap_10	13 km E of Arai	2011-03-11 18:59:16UTC	Japan
https://www.doi.org/10.1016/j.sandf.2014.06.001	334	2014	Nakamura, Susumu; Wakai, Akihiko; Umemura, Jun; Sugimoto, Hiroyuki; Takeshi, Toshiya	Earthquake-induced landslides: Distribution, motion and mechanisms	Soils and Foundations	single landslide analysis	single landslide comparison|single failure geotechnical characterization	jap_5	Eastern Honshu (Great Tohoku Earthquake)	2011-03-11 05:46:24UTC	Japan
https://www.doi.org/10.1007/s11069-014-1163-y	335	2014	Niño, Mauro; Jaimes, Miguel A.; Reinoso, Eduardo	Seismic-event-based methodology to obtain earthquake-induced translational landslide regional hazard maps	Natural Hazards	regional landslide analysis	regional susceptibility/hazard assessment	Not Applicable	Not Applicable	Not Applicable	Not Applicable
https://www.doi.org/10.1109/JSTARS.2014.2308553	336	2014	Niu, Ruiqing; Wu, Xueling; Yao, Dengkui; Peng, Ling; Ai, Li; Peng, Junhuan	Susceptibility Assessment of Landslides Triggered by the Lushan Earthquake, April 20, 2013, China	IEEE Journal of Selected Topics in Applied Earth Observations and Remote Sensing	regional landslide analysis	regional susceptibility/hazard assessment	chin_2	Lushan	2013-04-20 00:02:47UTC	China
https://www.doi.org/10.1016/j.jseaes.2014.06.014	337	2014	Xu, Chong; Xu, Xiwei; Shyu, J. Bruce H.; Zheng, Wenjun; Min, Wei	Landslides triggered by the 22 July 2013 Minxian–Zhangxian, China, Mw 5.9 earthquake: Inventory compiling and spatial distribution analysis	Journal of Asian Earth Sciences	regional landslide analysis	regional mapping|regional landslide descriptive statistics	chin_3	Minxian-Zhangxian	2013-07-21 23:45:56UTC	China
https://www.doi.org/10.1785/0120140047	338	2014	Harp, E. L.; Hartzell, S. H.; Jibson, R. W.; Ramirez-Guzman, L.; Schmitt, R. G.	Relation of Landslides Triggered by the Kiholo Bay Earthquake to Modeled Ground Motion	Bulletin of the Seismological Society of America	regional landslide analysis	regional susceptibility/hazard assessment	usa_8	Kiholo Bay (Hawaii region, Hawaii)	2006-10-15 17:07:49UTC	USA
https://www.doi.org/10.1016/j.enggeo.2014.03.018	339	2014	Dai, Zili; Huang, Yu; Cheng, Hualin; Xu, Qiang	3D numerical modeling using smoothed particle hydrodynamics of flow-like landslide propagation triggered by the 2008 Wenchuan earthquake	Engineering Geology	single landslide analysis	single failure modelling	chin_1	Wenchuan-Sichuan	2008-05-12 06:28:01UTC	China
https://www.doi.org/10.1016/j.quaint.2014.05.005	340	2014	Li, Yong; Zhou, Rongjun; Zhao, Guohua; Li, Haibing; Su, Decheng; Ding, Hairong; Yan, Zhaokun; Yan, Liang; Yun, Kung; Ma, Chao	Tectonic uplift and landslides triggered by the Wenchuan earthquake and constraints on orogenic growth: A case study from Hongchun Gully, Longmen Mountains, Sichuan, China	Quaternary International	regional landslide analysis	regional mapping	chin_1	Wenchuan-Sichuan	2008-05-12 06:28:01UTC	China
https://www.doi.org/10.1002/esp.3585	341	2014	Fan, Xuanmei; Rossiter, David G.; van Westen, Cees J.; Xu, Qiang; Görüm, Tolga	Empirical prediction of coseismic landslide dam formation: COSEISMIC LANDSLIDE DAM FORMATION	Earth Surface Processes and Landforms	regional landslide analysis	regional susceptibility/hazard assessment	chin_1	Wenchuan-Sichuan	2008-05-12 06:28:01UTC	China
https://www.doi.org/10.1016/j.enggeo.2014.07.009	342	2014	Valagussa, Andrea; Frattini, Paolo; Crosta, Giovanni B.	Earthquake-induced rockfall hazard zoning	Engineering Geology	regional landslide analysis	regional susceptibility/hazard assessment	ita_2	Friuli	1976-05-06 20:00:11UTC	Italy
https://www.doi.org/10.1016/j.enggeo.2014.07.023	343	2014	Lee, Chyi-Tyi	Statistical seismic landslide hazard analysis: An example from Taiwan	Engineering Geology	regional landslide analysis	regional susceptibility/hazard assessment	taiw_1	Chi Chi	1999-09-20 17:47:18UTC	Taiwan
https://www.doi.org/10.1016/j.enggeo.2014.07.013	344	2014	Wang, Gonghui; Huang, Runqiu; Lourenço, Sérgio D.N.; Kamai, Toshitaka	A large landslide triggered by the 2008 Wenchuan (M8.0) earthquake in Donghekou area: Phenomena and mechanisms	Engineering Geology	single landslide analysis	single failure geotechnical characterization|single failure geophysical characterization	chin_1	Wenchuan-Sichuan	2008-05-12 06:28:01UTC	China
https://www.doi.org/10.1016/j.enggeo.2014.09.006	345	2014	Has, Baator; Nozaki, Tamotsu	Role of geological structure in the occurrence of earthquake-induced landslides, the case of the 2007 Mid-Niigata Offshore Earthquake, Japan	Engineering Geology	regional landslide analysis	regional mapping|regional landslide descriptive statistics	jap_11	20 km NNW of Kashiwazaki	2007-07-16 01:13:22UTC	Japan
https://www.doi.org/10.1016/j.soildyn.2014.08.008	346	2014	Stamatopoulos, Constantine A.; Di, Baofeng	Simplified multi-block constitutive model predicting earthquake-induced landslide triggering and displacement along slip surfaces of saturated sand	Soil Dynamics and Earthquake Engineering	single landslide analysis	single failure modelling	jap_1|chin_1|jap_3	Niigata-Chuetsu|Wenchuan-Sichuan|Hyogo-ken Nanbu (Kobe)	2004-10-23 08:56:00UTC|2008-05-12 06:28:01UTC|1995-01-16 20:46:52UTC	Japan|China|Japan
https://www.doi.org/10.5194/esurf-3-501-2015	347	2015	Parker, R. N.; Hancox, G. T.; Petley, D. N.; Massey, C. I.; Densmore, A. L.; Rosser, N. J.	Spatial distributions of earthquake-induced landslides and hillslope preconditioning in the northwest South Island, New Zealand	Earth Surface Dynamics	regional landslide analysis	regional mapping|regional landslide descriptive statistics|regional susceptibility/hazard assessment	nze_5|nze_6	Buller|Inangahua	1929-06-16 22:47:30UTC|1968-05-23 17:24:18UTC	New Zealand|New Zealand
https://www.doi.org/10.1007/s11069-014-1441-8	348	2015	Yang, Zhi-hua; Lan, Heng-xing; Gao, Xing; Li, Lang-ping; Meng, Yun-shan; Wu, Yu-ming	Urgent landslide susceptibility assessment in the 2013 Lushan earthquake-impacted area, Sichuan Province, China	Natural Hazards	regional landslide analysis	regional mapping|regional susceptibility/hazard assessment	chin_2	Lushan	2013-04-20 00:02:47UTC	China
https://www.doi.org/10.1007/s11629-019-5479-7	349	2019	Ma, Si-yuan; Xu, Chong; Xu, Xi-wei	Volume expansion rates of seismic landslides and influencing factors: A case study of the 2008 Wenchuan earthquake	Journal of Mountain Science	regional landslide analysis	regional landslide descriptive statistics	chin_1	Wenchuan-Sichuan	2008-05-12 06:28:01UTC	China
https://www.doi.org/10.1007/s10346-020-01417-3	350	2020	Liu, P. L.-F.; Higuera, P.; Husrin, S.; Prasetya, G. S.; Prihantono, J.; Diastomo, H.; Pryambodo, D. G.; Susmoro, H.	Coastal landslides in Palu Bay during 2018 Sulawesi earthquake and tsunami	Landslides	regional landslide analysis	regional mapping	indo_1	Palu	2018-09-28 10:02:45UTC	Indonesia
https://www.doi.org/10.1016/j.enggeo.2020.105518	351	2020	Bai, Shibiao; Lu, Ping; Thiebes, Benni	Comparing characteristics of rainfall- and earthquake-triggered landslides in the Upper Minjiang catchment, China	Engineering Geology	regional landslide analysis	regional landslide descriptive statistics	chin_1	Wenchuan-Sichuan	2008-05-12 06:28:01UTC	China
https://www.doi.org/10.1007/s12665-019-8083-9	352	2019	Zhao, Xiaoyan; Hu, Kai; Burns, Scott F.; Hu, Houtian	Classification and sudden departure mechanism of high-speed landslides caused by the 2008 Wenchuan earthquake	Environmental Earth Sciences	single landslide analysis	single landslide comparison	chin_1	Wenchuan-Sichuan	2008-05-12 06:28:01UTC	China
https://www.doi.org/10.1007/s10346-019-01207-6	353	2019	Zhang, Shuai; Li, Ran; Wang, Fawu; Iio, Akinori	Characteristics of landslides triggered by the 2018 Hokkaido Eastern Iburi earthquake, Northern Japan	Landslides	regional landslide analysis	regional landslide descriptive statistics	jap_6	Hokkaido Eastern Iburi	2018-09-05 18:07:59UTC	Japan
https://www.doi.org/10.1002/esp.4781	354	2020	Koyanagi, Kenta; Gomi, Takashi; Sidle, Roy C.	Characteristics of landslides in forests and grasslands triggered by the 2016 Kumamoto earthquake	Earth Surface Processes and Landforms	regional landslide analysis	regional landslide comparison	jap_2	Kumamoto	2016-04-15 16:25:06UTC	Japan
https://www.doi.org/10.1007/s10346-019-01206-7	355	2019	Osanai, Nobutomo; Yamada, Takashi; Hayashi, Shin-ichiro; Kastura, Shin’ya; Furuichi, Takahisa; Yanai, Seiji; Murakami, Yasuhiro; Miyazaki, Tomoyoshi; Tanioka, Yuichiro; Takiguchi, Shigetaka; Miyazaki, Mayumi	Characteristics of landslides caused by the 2018 Hokkaido Eastern Iburi Earthquake	Landslides	regional landslide analysis	regional mapping|regional landslide descriptive statistics	jap_6	Hokkaido Eastern Iburi	2018-09-05 18:07:59UTC	Japan
https://www.doi.org/10.1007/s11629-019-5535-3	356	2019	Getahun, Ephrem; Qi, Sheng-wen; Guo, Song-feng; Zou, Yu; Liang, Ning	Characteristics of grain size distribution and the shear strength analysis of Chenjiaba long runout coseismic landslide	Journal of Mountain Science	single landslide analysis	single failure geotechnical characterization	chin_1	Wenchuan-Sichuan	2008-05-12 06:28:01UTC	China
https://www.doi.org/10.1016/j.enggeo.2019.105301	357	2020	Ling, Sixiang; Chigira, Masahiro	Characteristics and triggers of earthquake-induced landslides of pyroclastic fall deposits: An example from Hachinohe during the 1968 M7.9 tokachi-Oki earthquake, Japan	Engineering Geology	regional landslide analysis	regional mapping|regional landslide descriptive statistics	jap_12	168 km ENE of Hachinohe	1968-05-16 00:49:02UTC	Japan
https://www.doi.org/10.1007/s11629-019-5599-0	358	2020	Zhou, Ze-Hua; Lyu, Yan; Su, Sheng-rui; Liu, Shi-jie; Zhao, Hui; Li, Peng; Zhou, Yang	Characteristics and dynamics of the Ganqiuchi rock avalanche triggered by a paleo-earthquake in the Northern Qinling Mountains	Journal of Mountain Science	single landslide analysis	single failure modelling	Not Applicable	Not Applicable	Not Applicable	Not Applicable
https://www.doi.org/10.1016/S0013-7952(03)00127-3	359	2004	Khazai, Bijan; Sitar, Nicholas	Evaluation of factors controlling earthquake-induced landslides caused by Chi-Chi earthquake and comparison with the Northridge and Loma Prieta events	Engineering Geology	regional landslide analysis	regional mapping|regional landslide comparison	taiw_1	Chi Chi	1999-09-20 17:47:18UTC	Taiwan
https://www.doi.org/10.1016/S0013-7952(03)00126-1	360	2004	Lin, Meei-Ling; Tung, Chi-Che	A GIS-based potential analysis of the landslides induced by the Chi-Chi earthquake	Engineering Geology	regional landslide analysis	regional mapping|regional susceptibility/hazard assessment	taiw_1	Chi Chi	1999-09-20 17:47:18UTC	Taiwan
https://www.doi.org/10.1016/S0013-7952(03)00125-X	361	2004	Lin, Ching-Weei; Shieh, Chjeng-Lun; Yuan, Bee-Deh; Shieh, Yeou-Chung; Liu, Shou-Heng; Lee, Sen-Yuan	Impact of Chi-Chi earthquake on the occurrence of landslides and debris flows: example from the Chenyulan River watershed, Nantou, Taiwan	Engineering Geology	regional landslide analysis	regional mapping|regional landslide comparison	taiw_1	Chi Chi	1999-09-20 17:47:18UTC	Taiwan
https://www.doi.org/10.1016/S0013-7952(03)00124-8	362	2004	Chen, Tien-Chien; Lin, Meei-Ling; Hung, Ju-Jiang	Pseudostatic analysis of Tsao-Ling rockslide caused by Chi-Chi earthquake	Engineering Geology	single landslide analysis	single failure geotechnical characterization	taiw_1	Chi Chi	1999-09-20 17:47:18UTC	Taiwan
https://www.doi.org/10.1029/2018JB016433	363	2019	Li, Wei; Chen, Yun; Liu, Feng; Yang, Hongfeng; Liu, Jianli; Fu, Bihong	Chain‐Style Landslide Hazardous Process: Constraints From Seismic Signals Analysis of the 2017 Xinmo Landslide, SW China	Journal of Geophysical Research: Solid Earth	single landslide analysis	single failure geotechnical characterization	Not Applicable	Not Applicable	Not Applicable	Not Applicable
https://www.doi.org/10.1007/s10518-004-3804-0	364	2004	Bird, J. F.; Bommer, J. J.; Bray, J. D.; Sancio, R.; Spence, R. J. S.	Comparing Loss Estimation with Observed Damage in a Zone of Ground Failure: A Study of the 1999 Kocaeli Earthquake in Turkey	Bulletin of Earthquake Engineering	single landslide analysis	single failure impact/risk modelling	turk_1	Kocaeli earthquake	1999-08-17 00:01:39UTC	Turkey
https://www.doi.org/10.1016/j.soildyn.2003.11.007	365	2004	Onder Cetin, K; Isik, Nihat; Unutmaz, Berna	Seismically induced landslide at Degirmendere Nose, Izmit Bay during Kocaeli (Izmit)-Turkey earthquake	Soil Dynamics and Earthquake Engineering	single landslide analysis	single failure geotechnical characterization	turk_1	Kocaeli earthquake	1999-08-17 00:01:39UTC	Turkey
https://www.doi.org/10.1193/1.1768539	366	2004	Bozzano, Francesca; Martino, Salvatore; Naso, Giuseppe; Prestininzi, Alberto; Romeo, Roberto Walter; Mugnozza, Gabriele Scarascia	The Large Salcito Landslide Triggered by the 2002 Molise, Italy, Earthquake	Earthquake Spectra	single landslide analysis	single failure mapping|single failure geotechnical characterization	ita_9	Molise	2002-10-31 10:32:58UTC	Italy
https://www.doi.org/10.1193/1.1778173	367	2004	Jibson, R.W.; Harp, E.L.; Schulz, W.; Keefer, D.K.	Landslides triggered by the 2002 Denali fault, Alaska, earthquake and the inferred nature of the strong shaking	Earthquake Spectra	regional landslide analysis	regional mapping	usa_5	Denali fault	2002-11-03 22:12:41UTC	USA
https://www.doi.org/10.1016/j.enggeo.2004.05.006	368	2004	Bird, Juliet F.; Bommer, Julian J.	Earthquake losses due to ground failure	Engineering Geology	other		Not Applicable	Not Applicable	Not Applicable	Not Applicable
https://www.doi.org/10.1016/j.epsl.2004.10.018	369	2004	Malamud, Bruce D.; Turcotte, Donald L.; Guzzetti, Fausto; Reichenbach, Paola	Landslides, earthquakes, and erosion	Earth and Planetary Science Letters	regional landslide analysis	regional landslide comparison	Not Applicable	Not Applicable	Not Applicable	Not Applicable
https://www.doi.org/10.1016/j.crte.2005.04.017	370	2005	Chen, Rou-Fei; Chan, Yu-Chang; Angelier, Jacques; Hu, Jyr-Ching; Huang, Chung; Chang, Kuo-Jen; Shih, Tian-Yuan	Large earthquake-triggered landslides and mountain belt erosion: The Tsaoling case, Taiwan	Comptes Rendus Geoscience	single landslide analysis	single failure mapping	taiw_1	Chi Chi	1999-09-20 17:47:18UTC	Taiwan
https://www.doi.org/10.1007/s10346-005-0055-3	371	2005	Sassa, Kyoji; Fukuoka, Hiroshi; Wang, Fawu; Wang, Gonghui	Dynamic properties of earthquake-induced large-scale rapid landslides within past landslide masses	Landslides	single landslide analysis	single failure mapping|single failure modelling	jap_1	Niigata-Chuetsu	2004-10-23 08:56:00UTC	Japan
https://www.doi.org/10.3208/sandf.45.4_149	372	2005	Uzuoka, Ryosuke; Sento, Noriaki; Kazama, Motoki; Unno, Toshiyasu	Landslides During the Earthquakes on May 26 and July 26, 2003 in Miyagi, Japan	Soils and Foundations	single landslide analysis	single failure mapping|single failure modelling	jap_7|jap_14	Sanriku-Minami|7 km NW of Matsushima	2003-05-26 09:24:33UTC|2003-07-25 22:13:29UTC	Japan|Japan
https://www.doi.org/10.1016/j.enggeo.2005.07.004	373	2005	Sepúlveda, Sergio A.; Murphy, William; Jibson, Randall W.; Petley, David N.	Seismically induced rock slope failures resulting from topographic amplification of strong ground motions: The case of Pacoima Canyon, California	Engineering Geology	regional landslide analysis	regional susceptibility/hazard assessment	usa_4	Northridge	1994-01-17 12:30:55UTC	USA
https://www.doi.org/10.1016/j.enggeo.2005.04.004	374	2005	Chang, Kuo-Jen; Taboada, Alfredo; Lin, Ming-Lang; Chen, Rou-Fei	Analysis of landsliding by earthquake shaking using a block-on-slope thermo-mechanical model: Example of Jiufengershan landslide, central Taiwan	Engineering Geology	single landslide analysis	single failure modelling	taiw_1	Chi Chi	1999-09-20 17:47:18UTC	Taiwan
https://www.doi.org/10.1016/j.catena.2018.07.028	375	2018	Wistuba, Małgorzata; Malik, Ireneusz; Krzemień, Kazimierz; Gorczyca, Elżbieta; Sobucki, Mateusz; Wrońska-Wałach, Dominika; Gawior, Daniel	Can low-magnitude earthquakes act as a triggering factor for landslide activity? Examples from the Western Carpathian Mts, Poland	Catena	Not Applicable	historical/Holocene landslides	Not Applicable	Not Applicable	Not Applicable	Not Applicable
https://www.doi.org/10.1061/(ASCE)1090-0241(2005)131:11(1360)	376	2005	Pradel, Daniel; Smith, Patrick M.; Stewart, Jonathan P.; Raad, Glen	Case History of Landslide Movement during the Northridge Earthquake	Journal of Geotechnical and Geoenvironmental Engineering	single landslide analysis	single failure mapping|single failure geotechnical characterization|single failure geophysical characterization|single failure modelling	usa_4	Northridge	1994-01-17 12:30:55UTC	USA
https://www.doi.org/10.1016/j.geomorph.2005.02.004	377	2005	Chang, Kuo-Jen; Taboada, Alfredo; Chan, Yu-Chang	Geological and morphological study of the Jiufengershan landslide triggered by the Chi-Chi Taiwan earthquake	Geomorphology	single landslide analysis	single failure mapping	taiw_1	Chi Chi	1999-09-20 17:47:18UTC	Taiwan
https://www.doi.org/10.1016/j.soildyn.2005.04.005	378	2005	Martino, Salvatore; Scarascia Mugnozza, Gabriele	The role of the seismic trigger in the Calitri landslide (Italy): historical reconstruction and dynamic analysis	Soil Dynamics and Earthquake Engineering	single landslide analysis	single failure modelling	ita_1	Irpinia	1980-11-23 18:34:53UTC	Italy
https://njg.geologi.no/images/NJG_articles/60713_NGT_no_3_06_8.pdf	379	2006	Lee, H.; Ryan, H.; Kayen, R. E.; Haeussler, Peter J.; Dartnell, P.; Hampton, M. A.	Varieties of submarine failure morphologies of seismically-induced landslides in Alaskan fjords		Not Applicable	water environment landslides	usa_2	Alaska	1964-03-28 03:36:16UTC	USA
https://www.doi.org/10.5194/nhess-6-687-2006	380	2006	Lee, S.; Evangelista, D. G.	Earthquake-induced landslide-susceptibility mapping using an artificial neural network	Natural Hazards and Earth System Sciences	regional landslide analysis	regional mapping|regional susceptibility/hazard assessment	phi_2	Baguio City	1990-07-16 07:26:34UTC	Philippines
https://www.doi.org/10.1007/s10064-017-1191-4	381	2019	Shrestha, Suchita; Kang, Tae-Seob	Assessment of seismically-induced landslide susceptibility after the 2015 Gorkha earthquake, Nepal	Bulletin of Engineering Geology and the Environment	regional landslide analysis	regional susceptibility/hazard assessment	nep_1	Gorkha	2015-04-25 06:11:25UTC	Nepal
https://www.doi.org/10.1016/j.soildyn.2004.11.026	382	2006	Kokusho, T.; Ishizawa, T.	Energy approach for earthquake induced slope failure evaluation	Soil Dynamics and Earthquake Engineering	single landslide analysis	single failure modelling	Not Applicable	Not Applicable	Not Applicable	Not Applicable
https://www.doi.org/10.1007/s11069-018-3548-9	383	2019	Ma, Siyuan; Xu, Chong	Assessment of co-seismic landslide hazard using the Newmark model and statistical analyses: a case study of the 2013 Lushan, China, Mw6.6 earthquake	Natural Hazards	regional landslide analysis	regional susceptibility/hazard assessment	chin_2	Lushan	2013-04-20 00:02:47UTC	China
https://www.doi.org/10.1016/j.enggeo.2005.10.006	384	2006	Chigira, Masahiro; Yagi, Hiroshi	Geological and geomorphological characteristics of landslides triggered by the 2004 Mid Niigta prefecture earthquake in Japan	Engineering Geology	regional landslide analysis	regional mapping	jap_1	Niigata-Chuetsu	2004-10-23 08:56:00UTC	Japan
https://www.doi.org/10.1007/s10346-005-0001-4	385	2005	Chugh, Ashok K.; Stark, Timothy D.	Permanent seismic deformation analysis of a landslide	Landslides	single landslide analysis	single failure modelling	usa_7	Loma Prieta, California Earthquake	1989-10-18 00:04:15UTC	USA
https://www.doi.org/10.1007/s10064-018-1235-4	386	2019	Razifard, M.; Shoaei, G.; Zare, M.	Application of fuzzy logic in the preparation of hazard maps of landslides triggered by the twin Ahar-Varzeghan earthquakes (2012)	Bulletin of Engineering Geology and the Environment	regional landslide analysis	regional mapping|regional susceptibility/hazard assessment	ira_3|ira_4	Ahar-Varzeghan|Ahar-Varzeghan_2	2012-08-11 12:23:18UTC|2012-08-11 12:34:35UTC	Iran|Iran
https://www.doi.org/10.3390/geosciences10080323	387	2020	Lemaire, Emilie; Mreyen, Anne-Sophie; Dufresne, Anja; Havenith, Hans-Balder	Analysis of the Influence of Structural Geology on the Massive Seismic Slope Failure Potential Supported by Numerical Modelling	Geosciences	single landslide analysis	single landslide comparison|single failure modelling	Not Applicable	Not Applicable	Not Applicable	Not Applicable
https://www.doi.org/10.1193/1.2173021	388	2006	Kieffer, D. Scott; Jibson, Randy; Rathje, Ellen M.; Kelson, Keith	Landslides Triggered by the 2004 Niigata Ken Chuetsu, Japan, Earthquake	Earthquake Spectra	other|regional landslide analysis	regional mapping	jap_1	Niigata-Chuetsu	2004-10-23 08:56:00UTC	Japan
https://www.doi.org/10.1007/s10064-017-1103-7	389	2018	Hung, Ching; Lin, Guan-Wei; Syu, Huei-Sian; Chen, Chi-Wen; Yen, Hsin-Yi	Analysis of the Aso-Bridge landslide during the 2016 Kumamoto earthquakes in Japan	Bulletin of Engineering Geology and the Environment	single landslide analysis	single failure modelling	jap_2	Kumamoto	2016-04-15 16:25:06UTC	Japan
https://www.doi.org/10.1007/s10064-005-0013-2	390	2006	Qingli, Zeng; Yinsheng, Ma; Yue, Zhao; Zhifa, Yang; Aimin, Lin; Bihong, Fu	Ground failures associated with the 2001 Central Kunlun earthquake: implications for the construction of the Qinghai–Tibet railway	Bulletin of Engineering Geology and the Environment	Not Applicable	ground deformations and failure/liquefaction processes	chin_12	M 7.8 - Southern Qinghai, China	2001-11-14 09:26:10UTC	China
https://www.doi.org/10.1007/s10064-020-01890-z	391	2020	Fu, Xiaodong; Sheng, Qian; Li, Guo; Zhang, Zhenping; Zhou, Yongqiang; Du, Yuxiang	Analysis of landslide stability under seismic action and subsequent rainfall: a case study on the Ganjiazhai giant landslide along the Zhaotong-Qiaojia road during the 2014 Ludian earthquake, Yunnan, China	Bulletin of Engineering Geology and the Environment	single landslide analysis	single failure mapping|single failure geotechnical characterization|single failure geophysical characterization|single failure modelling	chin_5	Wenping (Ludian county)	2014-08-03 08:30:13UTC	China
https://www.doi.org/10.1007/s00254-006-0236-y	392	2006	Chen, Su-Chin; Wu, Chun-Hung	Slope stabilization and landslide size on Mt. 99 Peaks after Chichi Earthquake in Taiwan	Environmental Geology	regional landslide analysis	regional mapping|regional landslide descriptive statistics	taiw_1	Chi Chi	1999-09-20 17:47:18UTC	Taiwan
https://www.doi.org/10.1016/j.soildyn.2020.106066	393	2020	Huang, Duruo; Wang, Gang; Du, Chunyang; Jin, Feng; Feng, Kewei; Chen, Zhengwei	An integrated SEM-Newmark model for physics-based regional coseismic landslide assessment	Soil Dynamics and Earthquake Engineering	regional landslide analysis	regional susceptibility/hazard assessment	chin_5	Wenping (Ludian county)	2014-08-03 08:30:13UTC	China
https://www.doi.org/10.1016/j.compgeo.2019.103262	394	2020	Khalaj, Saeed; BahooToroody, Farshad; Mahdi Abaei, Mohammad; BahooToroody, Ahmad; De Carlo, Filippo; Abbassi, Rouzbeh	A methodology for uncertainty analysis of landslides triggered by an earthquake	Computers and Geotechnics	regional landslide analysis	regional susceptibility/hazard assessment	Not Applicable	Not Applicable	Not Applicable	Not Applicable
https://www.doi.org/10.5194/nhess-20-713-2020	395	2020	Zang, Mingdong; Qi, Shengwen; Zou, Yu; Sheng, Zhuping; Zamora, Blanca S.	An improved method of Newmark analysis for mapping hazards of coseismic landslides	Natural Hazards and Earth System Sciences	regional landslide analysis	regional susceptibility/hazard assessment	chin_5	Wenping (Ludian county)	2014-08-03 08:30:13UTC	China
https://www.doi.org/10.1007/s10064-018-1313-7	396	2019	Chen, Xiaoli; Liu, Chunguo; Wang, Mingming	A method for quick assessment of earthquake-triggered landslide hazards: a case study of the Mw6.1 2014 Ludian, China earthquake	Bulletin of Engineering Geology and the Environment	regional landslide analysis	regional susceptibility/hazard assessment	chin_5	Wenping (Ludian county)	2014-08-03 08:30:13UTC	China
https://www.doi.org/10.1016/j.enggeo.2018.11.012	397	2019	Doi, Issei; Kamai, Toshitaka; Azuma, Ryokei; Wang, Gonghui	A landslide induced by the 2016 Kumamoto Earthquake adjacent to tectonic displacement - Generation mechanism and long-term monitoring	Engineering Geology	single landslide analysis	single failure mapping|single failure geophysical characterization	jap_2	Kumamoto	2016-04-15 16:25:06UTC	Japan
https://www.doi.org/10.1029/2017JF004494	398	2018	Nowicki Jessee, M. A.; Hamburger, M. W.; Allstadt, K.; Wald, D. J.; Robeson, S. M.; Tanyas, H.; Hearne, M.; Thompson, E. M.	A Global Empirical Model for Near‐Real‐Time Assessment of Seismically Induced Landslides	Journal of Geophysical Research: Earth Surface	regional landslide analysis	regional susceptibility/hazard assessment	Not Applicable	Not Applicable	Not Applicable	Not Applicable
https://www.doi.org/10.1007/s10346-020-01356-z	399	2020	Nowicki Jessee, M. Anna; Hamburger, M. W.; Ferrara, M. R.; McLean, A.; FitzGerald, C.	A global dataset and model of earthquake-induced landslide fatalities	Landslides	other|regional landslide analysis	regional susceptibility/hazard assessment|regional risk modelling	Not Applicable	Not Applicable	Not Applicable	Not Applicable
https://www.doi.org/10.1016/j.geomorph.2018.09.010	400	2018	Li, Congrong; Wang, Ming; Liu, Kai	A decadal evolution of landslides and debris flows after the Wenchuan earthquake	Geomorphology	regional landslide analysis	regional mapping|regional landslide descriptive statistics	chin_1	Wenchuan-Sichuan	2008-05-12 06:28:01UTC	China
https://www.doi.org/10.1016/j.enggeo.2019.105226	401	2019	Mao, Zirui; Liu, Guirong; Huang, Yu; Bao, Yangjuan	A conservative and consistent Lagrangian gradient smoothing method for earthquake-induced landslide simulation	Engineering Geology	single landslide analysis	single failure modelling	chin_1	Wenchuan-Sichuan	2008-05-12 06:28:01UTC	China
https://www.socgeol.info/downloader.php?wht=articoli&id=38985	402	2007	Porfido, Sabina; Esposito, Eliana; Guerrieri, Luca; Vittori, Eutizio; Tranfaglia, Giuseppe; Pece, Raimondo	Seismically-induced ground effects of the 1805, 1930 and 1980 earthquakes in the Southern Apennines, Italy	Italian Journal of Geosciences	regional landslide analysis	regional mapping	Not Applicable	Not Applicable	Not Applicable	Not Applicable
https://www.doi.org/10.1016/j.enggeo.2006.02.017	403	2006	Keefer, David K.; Wartman, Joseph; Navarro Ochoa, Carlos; Rodriguez-Marek, Adrian; Wieczorek, Gerald F.	Landslides caused by the M 7.6 Tecomán, Mexico earthquake of January 21, 2003	Engineering Geology	regional landslide analysis	regional landslide comparison	mex_2	16 km SSW of Cuyutlán	2003-01-22 02:06:34UTC	Mexico
https://www.doi.org/10.1016/j.enggeo.2006.02.016	404	2006	Mahdavifar, Mohammad R.; Solaymani, Shahryar; Jafari, Mohammad K.	Landslides triggered by the Avaj, Iran earthquake of June 22, 2002	Engineering Geology	regional landslide analysis	regional mapping|regional landslide descriptive statistics	ira_6	59 km SSW of Abhar	2002-06-22 02:58:21UTC	Iran
https://www.doi.org/10.1016/j.enggeo.2006.02.010	405	2006	Lin, Ching-Weei; Liu, Shou-Heng; Lee, Sen-Yuan; Liu, Cheng-Chien	Impacts of the Chi-Chi earthquake on subsequent rainfall-induced landslides in central Taiwan	Engineering Geology	regional landslide analysis	regional landslide comparison	taiw_1	Chi Chi	1999-09-20 17:47:18UTC	Taiwan
https://www.doi.org/10.3208/sandf.46.843	406	2006	Mizuhashi, Masanori; Towhata, Ikuo; Sato, Junichi; Tsujimura, Takashi	Examination of Slope Hazard Assessment by Using Case Studies of Earthquake- and Rainfall-Induced Landslides	Soils and Foundations	regional landslide analysis|single landslide analysis	regional susceptibility/hazard assessment|single failure geotechnical characterization	jap_1	Niigata-Chuetsu	2004-10-23 08:56:00UTC	Japan
https://www.doi.org/10.3208/sandf.46.751	407	2006	Onoue, Atsuo; Wakai, Akihiko; Ugai, Keizo; Higuchi, Kunihiro; Fukutake, Kiyoshi; Hotta, Hiroyuki; Kuroda, Seiichiro; Nagai, Hideaki	Slope Failures at Yokowatashi and Nagaoka College of Technology Due to the 2004 Niigata-Ken Chuetsu Earthquake and Their Analytical Considerations	Soils and Foundations	single landslide analysis	single failure impact/risk modelling|single failure modelling	jap_1	Niigata-Chuetsu	2004-10-23 08:56:00UTC	Japan
https://www.doi.org/10.3208/sandf.46.727	408	2006	Toyota, Hirofumi; Wang, Jinxing; Nakamura, Kouichi; Sakai, Naoki	Evaluation of Natural Slope Failures Induced by the 2004 Niigata-Ken Chuetsu Earthquake	Soils and Foundations	regional landslide analysis|single landslide analysis	regional mapping|single failure geotechnical characterization	jap_1	Niigata-Chuetsu	2004-10-23 08:56:00UTC	Japan
https://www.doi.org/10.3208/sandf.46.713	409	2006	Tsukamoto, Yoshimichi; Ishihara, Kenji; Kobari, Yasuhide	Evaluation of Run-Out Distances of Slope Failures During 2004 Niigata-Ken Chuetsu Earthquake	Soils and Foundations	single landslide analysis	single failure geotechnical characterization	jap_1	Niigata-Chuetsu	2004-10-23 08:56:00UTC	Japan
https://www.doi.org/10.1007/s10706-005-4896-2	410	2006	Trandafir, Aurelian Catalin; Sassa, Kyoji	Performance-based assessment of earthquake-induced catastrophic landslide hazard in liquefiable soils	Geotechnical and Geological Engineering	single landslide analysis	single failure modelling	jap_7	Sanriku-Minami	2003-05-26 09:24:33UTC	Japan
https://www.doi.org/10.1016/j.enggeo.2006.09.008	411	2006	Chen, Rou-Fei; Chang, Kuo-Jen; Angelier, Jacques; Chan, Yu-Chang; Deffontaines, Benoît; Lee, Chyi-Tyi; Lin, Ming-Lang	Topographical changes revealed by high-resolution airborne LiDAR data: The 1999 Tsaoling landslide induced by the Chi–Chi earthquake	Engineering Geology	other|single landslide analysis	single failure mapping	taiw_1	Chi Chi	1999-09-20 17:47:18UTC	Taiwan
https://www.doi.org/10.5194/nhess-7-695-2007	412	2007	Marcato, G.; Fujisawa, K.; Mantovani, M.; Pasuto, A.; Silvano, S.; Tagliavini, F.; Zabuski, L.	Evaluation of seismic effects on the landslide deposits of Monte Salta (Eastern Italian Alps) using distinct element method	Natural Hazards and Earth System Sciences	single landslide analysis	single failure modelling	Not Applicable	Not Applicable	Not Applicable	Not Applicable
https://www.doi.org/10.1080/01431160701311242	413	2007	Hong, Y.; Adler, R. F.	Towards an early‐warning system for global landslides triggered by rainfall and earthquake	International Journal of Remote Sensing	Not Applicable	rainfall-induced landslides	Not Applicable	Not Applicable	Not Applicable	Not Applicable
https://www.doi.org/10.3208/sandf.47.11	414	2007	Gerolymos, Nikos; Vardoulakis, Ioannis; Gazetas, George	A Thermo-Poro-Visco-Plastic Shear Band Model for Seismic Triggering and Evolution of Catastrophic Landslides	Soils and Foundations	single landslide analysis	single failure modelling	Not Applicable	Not Applicable	Not Applicable	Not Applicable
https://www.doi.org/10.1007/s11069-006-9009-x	415	2006	Wang, H. B.; Sassa, K.; Xu, W. Y.	Analysis of a spatial distribution of landslides triggered by the 2004 Chuetsu earthquakes of Niigata Prefecture, Japan	Natural Hazards	regional landslide analysis	regional susceptibility/hazard assessment	jap_1	Niigata-Chuetsu	2004-10-23 08:56:00UTC	Japan
https://www.doi.org/10.1080/01431160600954720	416	2007	Das, J. D.; Saraf, A. K.; Panda, S.	Satellite data in a rapid analysis of Kashmir earthquake (October 2005) triggered landslide pattern and river water turbidity in and around the epicentral region	International Journal of Remote Sensing	regional landslide analysis	regional mapping	pak_1	Kashmir	2005-10-08 03:50:40UTC	Pakistan
https://www.doi.org/10.1007/s10346-006-0069-5	417	2007	Sato, Hiroshi P.; Hasegawa, Hiroyuki; Fujiwara, Satoshi; Tobita, Mikio; Koarai, Mamoru; Une, Hiroshi; Iwahashi, Junko	Interpretation of landslide distribution triggered by the 2005 Northern Pakistan earthquake using SPOT 5 imagery	Landslides	regional landslide analysis	regional mapping|regional landslide descriptive statistics	pak_1	Kashmir	2005-10-08 03:50:40UTC	Pakistan
https://www.doi.org/10.1007/s10346-006-0068-6	418	2006	Champati ray, P. K.; Dimri, Suvarna; Lakhera, R. C.; Sati, Santosh	Fuzzy-based method for landslide hazard assessment in active seismic zone of Himalaya	Landslides	regional landslide analysis	regional susceptibility/hazard assessment	Not Applicable	Not Applicable	Not Applicable	Not Applicable
https://www.doi.org/10.1061/(ASCE)1090-0241(2007)133:7(828)	419	2007	Kokusho, T.; Ishizawa, T.	Energy Approach to Earthquake-Induced Slope Failures and Its Implications	Journal of Geotechnical and Geoenvironmental Engineering	regional landslide analysis	regional risk modelling	Not Applicable	Not Applicable	Not Applicable	Not Applicable
https://www.doi.org/10.5589/m07-036	420	2007	Lin, Wen-Tzu; Chou, Wen-Chieh; Lin, Chao-Yuan; Huang, Pi-Hui; Tsai, Jing-Shyan	Study of landslides caused by the 1999 Chi-Chi earthquake, Taiwan, with multitemporal SPOT images	Canadian Journal of Remote Sensing	regional landslide analysis	regional mapping	taiw_1	Chi Chi	1999-09-20 17:47:18UTC	Taiwan
https://www.doi.org/10.1016/j.enggeo.2007.07.003	421	2007	Dunning, S. A.; Mitchell, W. A.; Rosser, N. J.; Petley, D. N.	The Hattian Bala rock avalanche and associated landslides triggered by the Kashmir Earthquake of 8 October 2005	Engineering Geology	regional landslide analysis	regional mapping|regional landslide descriptive statistics	pak_1	Kashmir	2005-10-08 03:50:40UTC	Pakistan
https://www.doi.org/10.1016/j.geomorph.2006.12.011	422	2007	Chang, Kang-Tsung; Chiang, Shou-Hao; Hsu, Mei-Ling	Modeling typhoon- and earthquake-induced landslides in a mountainous watershed using logistic regression	Geomorphology	regional landslide analysis	regional mapping|regional susceptibility/hazard assessment	taiw_1	Chi Chi	1999-09-20 17:47:18UTC	Taiwan
https://www.doi.org/10.1016/j.enggeo.2007.07.007	423	2007	Zhang, Dexuan; Wang, Gonghui	Study of the 1920 Haiyuan earthquake-induced landslides in loess (China)	Engineering Geology	single landslide analysis	single failure geotechnical characterization	chin_4	Haiyuan	1920-12-16 12:05:55UTC	China
https://www.doi.org/10.1007/s10346-007-0093-0	424	2007	Yamagishi, Hiromitsu; Iwahashi, Junko	Comparison between the two triggered landslides in Mid-Niigata, Japan by July 13 heavy rainfall and October 23 intensive earthquakes in 2004	Landslides	regional landslide analysis	regional mapping|regional landslide comparison	jap_1	Niigata-Chuetsu	2004-10-23 08:56:00UTC	Japan
https://www.doi.org/10.1080/13658810801914458	425	2008	Lin, Wen-Tzu	Earthquake‐induced landslide hazard monitoring and assessment using SOM and PROMETHEE techniques: A case study at the Chiufenershan area in Central Taiwan	International Journal of Geographical Information Science	regional landslide analysis	regional susceptibility/hazard assessment	taiw_1	Chi Chi	1999-09-20 17:47:18UTC	Taiwan
https://www.doi.org/10.1016/j.geomorph.2007.04.007	426	2008	Owen, Lewis A.; Kamp, Ulrich; Khattak, Ghazanfar A.; Harp, Edwin L.; Keefer, David K.; Bauer, Mark A.	Landslides triggered by the 8 October 2005 Kashmir earthquake	Geomorphology	regional landslide analysis	regional susceptibility/hazard assessment	pak_1	Kashmir	2005-10-08 03:50:40UTC	Pakistan
https://www.doi.org/10.1016/j.geomorph.2007.06.001	427	2008	García-Rodríguez, M. J.; Malpica, J. A.; Benito, B.; Díaz, M.	Susceptibility assessment of earthquake-triggered landslides in El Salvador using logistic regression	Geomorphology	regional landslide analysis	regional susceptibility/hazard assessment	Not Applicable	Not Applicable	Not Applicable	Not Applicable
https://www.doi.org/10.4401/ag-3029	428	2008	Anzidei, M.; Baldi, P.; Serpelloni, E.	The coseismic ground deformations of the 1997 Umbria-Marche earthquakes: a lesson for the development of new GPS networks	Annals of Geophysics	Not Applicable	ground deformations and failure/liquefaction processes	ita_12	Umbria-Marche	1997-09-26 09:40:26UTC	Italy
https://www.doi.org/10.1016/j.enggeo.2008.03.004	429	2008	Lee, Chyi-Tyi; Huang, Chien-Cheng; Lee, Jiin-Fa; Pan, Kuo-Liang; Lin, Ming-Lang; Dong, Jia-Jyun	Statistical approach to earthquake-induced landslide susceptibility	Engineering Geology	regional landslide analysis	regional susceptibility/hazard assessment	taiw_1	Chi Chi	1999-09-20 17:47:18UTC	Taiwan
https://www.doi.org/10.1007/s12665-014-3758-8	430	2015	Liu, Lina; Xu, Chong; Xu, Xiwei; Tian, Yingying; Ran, Yongkang; Chen, Jian	Interactive statistical analysis of predisposing factors for earthquake-triggered landslides: a case study of the 2013 Lushan, China Ms7.0 earthquake	Environmental Earth Sciences	regional landslide analysis	regional mapping|regional susceptibility/hazard assessment	taiw_1	Chi Chi	1999-09-20 17:47:18UTC	Taiwan
https://www.doi.org/10.1007/s11629-014-3015-3	431	2015	Yang, Chang-wei; Zhang, Jian-jing; Bi, Jun-wei	Application of Hilbert-Huang Transform to the analysis of the landslides triggered by the Wenchuan earthquake	Journal of Mountain Science	single landslide analysis	single failure modelling	chin_1	Wenchuan-Sichuan	2008-05-12 06:28:01UTC	China
https://www.doi.org/10.1016/j.geomorph.2015.07.002	432	2015	Xu, Chong; Xu, Xiwei; Shyu, J. Bruce H.	Database and spatial distribution of landslides triggered by the Lushan, China Mw 6.6 earthquake of 20 April 2013	Geomorphology	other|regional landslide analysis	regional mapping|regional landslide descriptive statistics	chin_2	Lushan	2013-04-20 00:02:47UTC	China
https://www.doi.org/10.1007/s11069-016-2361-6	433	2016	Singh, Krishna Kant; Singh, Akansha	Detection of 2011 Sikkim earthquake-induced landslides using neuro-fuzzy classifier and digital elevation model	Natural Hazards	regional landslide analysis	regional mapping	ind_2	Sikkim	2011-09-18 12:40:51UTC	India
https://www.doi.org/10.1007/s12583-016-0905-z	434	2016	Tian, Yingying; Xu, Chong; Xu, Xiwei; Chen, Jian	Detailed inventory mapping and spatial analyses to landslides induced by the 2013 Ms 6.6 Minxian earthquake of China	Journal of Earth Science	other|regional landslide analysis	regional mapping|regional landslide descriptive statistics	chin_3	Minxian-Zhangxian	2013-07-21 23:45:56UTC	China
https://www.doi.org/10.1016/j.enggeo.2016.11.003	435	2016	Song, Yixiang; Huang, Da; Cen, Duofeng	Numerical modelling of the 2008 Wenchuan earthquake-triggered Daguangbao landslide using a velocity and displacement dependent friction law	Engineering Geology	single landslide analysis	single failure modelling	chin_1	Wenchuan-Sichuan	2008-05-12 06:28:01UTC	China
https://www.doi.org/10.1016/j.enggeo.2016.12.015	436	2017	Wu, Jian-Hong; Liao, Cheng-Jie; Lin, Hung-Ming; Fang, Tzu-Ting	An experimental study to characterize the initiation of the seismic-induced Tsaoling rock avalanche	Engineering Geology	single landslide analysis	single failure modelling	taiw_1	Chi Chi	1999-09-20 17:47:18UTC	Taiwan
https://www.doi.org/10.1016/j.soildyn.2017.09.012	437	2017	Sharifi-Mood, Mahyar; Olsen, Michael J.; Gillins, Daniel T.; Mahalingam, Rubini	Performance-based, seismically-induced landslide hazard mapping of Western Oregon	Soil Dynamics and Earthquake Engineering	regional landslide analysis	regional mapping|regional susceptibility/hazard assessment	Not Applicable	Not Applicable	Not Applicable	Not Applicable
https://www.doi.org/10.1080/19475705.2018.1451399	438	2018	Xie, Peng; Wen, Haijia; Ma, Chaochao; Baise, Laurie G.; Zhang, Jialan	Application and comparison of logistic regression model and neural network model in earthquake-induced landslides susceptibility mapping at mountainous region, China	Geomatics, Natural Hazards and Risk	regional landslide analysis	regional susceptibility/hazard assessment	chin_1	Wenchuan-Sichuan	2008-05-12 06:28:01UTC	China
https://www.doi.org/10.1016/j.soildyn.2017.11.027	439	2018	Song, Jian; Gao, Yufeng; Feng, Tugen	Probabilistic assessment of earthquake-induced landslide hazard including the effects of ground motion directionality	Soil Dynamics and Earthquake Engineering	regional landslide analysis	regional susceptibility/hazard assessment	Not Applicable	Not Applicable	Not Applicable	Not Applicable
https://www.doi.org/10.1098/rsos.171418	440	2018	Zhao, Bo; Wang, Yun-sheng; Luo, Yong-hong; Li, Jia; Zhang, Xin; Shen, Tong	Landslides and dam damage resulting from the Jiuzhaigou earthquake (8 August 2017), Sichuan, China	Royal Society Open Science	other|regional landslide analysis	regional mapping|regional landslide descriptive statistics	chin_8	Jiuzhaigou County, Sichuan Province	2017-08-08 13:19:49UTC	China
https://www.doi.org/10.1007/s11629-013-2471-5	441	2013	Li, Wei-le; Huang, Run-qiu; Tang, Chuan; Xu, Qiang; van Westen, Cees	Co-seismic landslide inventory and susceptibility mapping in the 2008 Wenchuan earthquake disaster area, China	Journal of Mountain Science	regional landslide analysis	regional mapping|regional susceptibility/hazard assessment	chin_1	Wenchuan-Sichuan	2008-05-12 06:28:01UTC	China
https://www.doi.org/10.3390/rs5062590	442	2013	Lacroix, Pascal; Zavala, Bilberto; Berthier, Etienne; Audin, Laurence	Supervised Method of Landslide Inventory Using Panchromatic SPOT5 Images and Application to the Earthquake-Triggered Landslides of Pisco (Peru, 2007, Mw8.0)	Remote Sensing	regional landslide analysis	regional mapping	per_3	41 km SW of San Vicente de Cañete	2007-08-15 23:40:57UTC	Peru
https://www.doi.org/10.1007/s11803-013-0163-3	443	2013	Yang, Changwei; Zhang, Jianjing; Zhang, Ming	A prediction model for horizontal run-out distance of landslides triggered by Wenchuan earthquake	Earthquake Engineering and Engineering Vibration	single landslide analysis	single landslide comparison|single failure modelling	chin_1	Wenchuan-Sichuan	2008-05-12 06:28:01UTC	China
https://www.doi.org/10.3724/SP.J.1246.2013.03012	444	2013	Hongbo, Tan; Chongyang, Shen; Jin, Wei; Bin, Zhao; Jian, Wang; Songbai, Xuan	Simulation of coseismic effects of the Ms7.0 Lushan earthquake	Geodesy and Geodynamics	Not Applicable	ground deformations and failure/liquefaction processes	chin_2	Lushan	2013-04-20 00:02:47UTC	China
https://www.doi.org/10.1007/s10346-012-0340-x	445	2013	Xu, Chong; Xu, Xiwei; Yu, Guihua	Landslides triggered by slipping-fault-generated earthquake on a plateau: an example of the 14 April 2010, Ms 7.1, Yushu, China earthquake	Landslides	regional landslide analysis	regional mapping|regional landslide descriptive statistics	chin_6	Yushu (southern Qinghai)	2010-04-13 23:49:38UTC	China
https://www.doi.org/10.1007/s11069-013-0671-5	446	2013	Huang, Runqiu; Zhao, Jianjun; Ju, Nengpan; Li, Guo; Lee, Min Lee; Li, Yanrong	Analysis of an anti-dip landslide triggered by the 2008 Wenchuan earthquake in China	Natural Hazards	single landslide analysis	single failure modelling	chin_1	Wenchuan-Sichuan	2008-05-12 06:28:01UTC	China
https://www.doi.org/10.1007/s12594-013-0150-3	447	2013	Wu, Junfeng; Wang, Yunsheng; Dong, Simeng; Chen, Yun; Wang, Lei	Genetic mechanism and failure process of the Mogangling seismic landslide	Journal of the Geological Society of India	Not Applicable	historical/Holocene landslides	chin_7	Moxi	1786-06-01	China
https://www.doi.org/10.1007/s12517-012-0646-y	448	2013	Xu, Chong; Xu, Xiwei	Controlling parameter analyses and hazard mapping for earthquake-triggered landslides: an example from a square region in Beichuan County, Sichuan Province, China	Arabian Journal of Geosciences	regional landslide analysis	regional susceptibility/hazard assessment	chin_1	Wenchuan-Sichuan	2008-05-12 06:28:01UTC	China
https://www.doi.org/10.1007/s11629-013-2786-2	449	2013	Li, Wei-le; Huang, Run-qiu; Xu, Qiang; Tang, Chuan	Rapid susceptibility mapping of co-seismic landslides triggered by the 2013 Lushan Earthquake using the regression model developed for the 2008 Wenchuan Earthquake	Journal of Mountain Science	regional landslide analysis	regional susceptibility/hazard assessment	chin_2	Lushan	2013-04-20 00:02:47UTC	China
https://www.doi.org/10.1016/j.jseaes.2013.08.007	450	2013	Zhou, Jia-wen; Cui, Peng; Yang, Xing-guo	Dynamic process analysis for the initiation and movement of the Donghekou landslide-debris flow triggered by the Wenchuan earthquake	Journal of Asian Earth Sciences	single landslide analysis	single failure modelling	chin_1	Wenchuan-Sichuan	2008-05-12 06:28:01UTC	China
https://www.doi.org/10.1016/j.enggeo.2013.08.002	451	2013	Zhang, Yingbin; Chen, Guangqi; Zheng, Lu; Li, Yange; Wu, Jian	Effects of near-fault seismic loadings on run-out of large-scale landslide: A case study	Engineering Geology	single landslide analysis	single failure modelling	chin_1	Wenchuan-Sichuan	2008-05-12 06:28:01UTC	China
https://www.doi.org/10.1007/s11069-013-0757-0	452	2013	Xu, Chong; Xu, Xiwei; Zhou, Bengang; Yu, Guihua	Revisions of the M 8.0 Wenchuan earthquake seismic intensity map based on co-seismic landslide abundance	Natural Hazards	regional landslide analysis	regional landslide descriptive statistics	chin_1	Wenchuan-Sichuan	2008-05-12 06:28:01UTC	China
https://www.doi.org/10.1007/s10346-012-0357-1	453	2013	Papathanassiou, George; Valkaniotis, Sotiris; Ganas, Athanassios; Pavlides, Spyros	GIS-based statistical analysis of the spatial distribution of earthquake-induced landslides in the island of Lefkada, Ionian Islands, Greece	Landslides	regional landslide analysis	regional mapping|regional susceptibility/hazard assessment|regional landslide descriptive statistics	gre_1	Lefkada Ionian Islands (Greece-Albania border region)	2003-08-14 05:14:54UTC	Greece
https://www.doi.org/10.5194/nhess-14-1789-2014	454	2014	Xu, C.; Shyu, J. B. H.; Xu, X.	Landslides triggered by the 12 January 2010 Port-au-Prince, Haiti, &lt;i&gt;M&lt;/i&gt;&lt;sub&gt;w&lt;/sub&gt; = 7.0 earthquake: visual interpretation, inventory compiling, and spatial distribution statistical analysis	Natural Hazards and Earth System Sciences	regional landslide analysis	regional mapping|regional landslide descriptive statistics	hai_1	Haiti region	2010-01-12 21:53:10UTC	Haiti
https://www.doi.org/10.1007/s10346-018-0963-7	455	2018	Salinas-Jasso, Jorge A.; Montalvo-Arrieta, Juan C.; Reinoso-Angulo, Eduardo	Landslides induced by a low magnitude seismic sequence at continental interiors: a case study of the Santa Rosa Canyon, northeastern Mexico	Landslides	regional landslide analysis	regional mapping	Not Applicable	Not Applicable	Not Applicable	Not Applicable
https://www.doi.org/10.1007/s11629-017-4761-9	456	2018	Wu, Chun-hao; Cui, Peng; Li, Yu-sheng; Ayala, Irasema Alcántara; Huang, Chao; Yi, Shu-jian	Seismogenic fault and topography control on the spatial patterns of landslides triggered by the 2017 Jiuzhaigou earthquake	Journal of Mountain Science	regional landslide analysis	regional mapping	chin_8	Jiuzhaigou County, Sichuan Province	2017-08-08 13:19:49UTC	China
https://www.doi.org/10.1016/j.enggeo.2015.07.016	457	2015	Delgado, J.; García-Tortosa, F.J.; Garrido, J.; Loffredo, A.; López-Casado, C.; Martin-Rojas, I.; Rodríguez-Peces, M.J.	Seismically-induced landslides by a low-magnitude earthquake: The Mw4.7 Ossa De Montiel event (central Spain)	Engineering Geology	regional landslide analysis	regional mapping	spa_3	Ossa de Montiel	2015-02-23 16:16:29UTC	Spain
https://www.doi.org/10.1007/s11803-016-0313-5	458	2016	Chang, Ming; Tang, Chuan; Xia, Chenhao; Fang, Qunsheng	Spatial distribution analysis of landslides triggered by the 2013-04-20 Lushan earthquake, China	Earthquake Engineering and Engineering Vibration	regional landslide analysis	regional mapping|regional landslide descriptive statistics	chin_2	Lushan	2013-04-20 00:02:47UTC	China
https://www.doi.org/10.1007/s00603-016-0975-3	459	2016	Aydan, Ö.	Large Rock Slope Failures Induced by Recent Earthquakes	Rock Mechanics and Rock Engineering	single landslide analysis	single landslide comparison|single failure modelling	taiw_1|jap_1|pak_1|chin_1| jap_4	Chi Chi|Niigata-Chuetsu|Kashmir|Wenchuan-Sichuan|Iwate–Miyagi Nairiku (eastern Honshu, Japan)	1999-09-20 17:47:18UTC|2004-10-23 08:56:00UTC|2005-10-08 03:50:40UTC|2008-05-12 06:28:01UTC|2008-06-13 23:43:45UTC	Taiwan|Japan|Pakistan|China|Japan
https://www.doi.org/10.1007/s11707-015-0547-y	460	2016	Yuan, Renmao; Deng, Qinghai; Cunningham, Dickson; Han, Zhujun; Zhang, Dongli; Zhang, Bingliang	Newmark displacement model for landslides induced by the 2013 Ms 7.0 Lushan earthquake, China	Frontiers in Earth Science	regional landslide analysis	regional susceptibility/hazard assessment	chin_2	Lushan	2013-04-20 00:02:47UTC	China
https://www.doi.org/10.1016/j.compgeo.2016.08.010	461	2017	Efremidis, George; Avlonitis, Markos; Konstantinidis, Avraam; Aifantis, Elias C.	A statistical study of precursor activity in earthquake-induced landslides	Computers and Geotechnics	Not Applicable	Not Applicable	Not Applicable	Not Applicable	Not Applicable	Not Applicable
https://www.doi.org/10.1007/s10064-014-0574-z	462	2015	Wang, Genlong	Comparison of the landslides triggered by the 2013 Lushan earthquake with those triggered by the strong 2008 Wenchuan earthquake in areas with high seismic intensities	Bulletin of Engineering Geology and the Environment	regional landslide analysis	regional landslide comparison	chin_1|chin_2	Wenchuan-Sichuan|Lushan	2008-05-12 06:28:01UTC|2013-04-20 00:02:47UTC	China|China
https://www.doi.org/10.1007/s10346-014-0546-1	463	2015	Xu, Chong; Xu, Xiwei; Shyu, J. Bruce H.; Gao, Mingxing; Tan, Xibin; Ran, Yongkang; Zheng, Wenjun	Landslides triggered by the 20 April 2013 Lushan, China, Mw 6.6 earthquake from field investigations and preliminary analyses	Landslides	regional landslide analysis	regional mapping|regional landslide descriptive statistics	chin_2	Lushan	2013-04-20 00:02:47UTC	China
https://www.doi.org/10.1007/s12665-014-3626-6	464	2015	Xing, A. G.; Xu, Q.; Gan, J. J.	On characteristics and dynamic analysis of the Niumian valley rock avalanche triggered by the 2008 Wenchuan earthquake, Sichuan, China	Environmental Earth Sciences	regional landslide analysis	regional mapping|regional landslide comparison	chin_1	Wenchuan-Sichuan	2008-05-12 06:28:01UTC	China
https://www.doi.org/10.1007/s10346-014-0486-9	465	2015	Yuan, Ren-mao; Tang, Chao-Lung; Deng, Qing-hai	Effect of the acceleration component normal to the sliding surface on earthquake-induced landslide triggering	Landslides	single landslide analysis	single failure modelling	chin_1	Wenchuan-Sichuan	2008-05-12 06:28:01UTC	China
https://www.doi.org/10.1007/s10346-013-0387-3	466	2013	Zhou, Jia-wen; Cui, Peng; Fang, Hua	Dynamic process analysis for the formation of Yangjiagou landslide-dammed lake triggered by the Wenchuan earthquake, China	Landslides	Not Applicable	water environment landslides	chin_1	Wenchuan-Sichuan	2008-05-12 06:28:01UTC	China
https://www.doi.org/10.1144/qjegh2012-006	467	2013	Xu, Chong; Xu, Xiwei; Yao, Qi; Wang, Yanying	GIS-based bivariate statistical modelling for earthquake-triggered landslides susceptibility mapping related to the 2008 Wenchuan earthquake, China	Quarterly Journal of Engineering Geology and Hydrogeology	regional landslide analysis	regional mapping|regional landslide descriptive statistics|regional susceptibility/hazard assessment	chin_1	Wenchuan-Sichuan	2008-05-12 06:28:01UTC	China
https://www.doi.org/10.1002/esp.3277	468	2013	Wang, Gonghui; Huang, Runqiu; Chigira, Masahiro; Wu, Xiyong; Lourenço, Sérgio D. N.	Landslide Amplification by Liquefaction of Runout-Path Material after the 2008 Wenchuan (M 8·0) Earthquake, China: XIEJIADIAN LANDSLIDE TRIGGERED BY 2008 WENCHUAN EARTHQUAKE	Earth Surface Processes and Landforms	single landslide analysis	single failure mapping|single failure modelling|single failure geotechnical characterization	chin_1	Wenchuan-Sichuan	2008-05-12 06:28:01UTC	China
https://www.doi.org/10.1785/0120120019	469	2013	Lenti, L.; Martino, S.	A Parametric Numerical Study of the Interaction between Seismic Waves and Landslides for the Evaluation of the Susceptibility to Seismically Induced Displacements	Bulletin of the Seismological Society of America	single landslide analysis	single failure modelling	Not Applicable	Not Applicable	Not Applicable	Not Applicable
https://www.doi.org/10.1007/s11069-012-0424-x	470	2013	Huang, Runqiu; Huang, Jian; Ju, Nengpan; He, Chaoyang; Li, Weile	WebGIS-based information management system for landslides triggered by Wenchuan earthquake	Natural Hazards	other		chin_1	Wenchuan-Sichuan	2008-05-12 06:28:01UTC	China
https://www.doi.org/10.1016/j.enggeo.2012.10.012	471	2013	Guo, Deping; Hamada, Masanori	Qualitative and quantitative analysis on landslide influential factors during Wenchuan earthquake: A case study in Wenchuan County	Engineering Geology	regional landslide analysis	regional landslide descriptive statistics	chin_1	Wenchuan-Sichuan	2008-05-12 06:28:01UTC	China
https://www.doi.org/10.1016/j.pce.2013.02.002	472	2013	Paoletti, V.; Tarallo, D.; Matano, F.; Rapolla, A.	Level-2 susceptibility zoning on seismic-induced landslides: An application to Sannio and Irpinia areas, Southern Italy	Physics and Chemistry of the Earth, Parts A/B/C	regional landslide analysis	regional susceptibility/hazard assessment	Not Applicable	Not Applicable	Not Applicable	Not Applicable
https://www.doi.org/10.1007/s11069-012-0390-3	473	2013	Pareek, Naveen; Sharma, Mukat L.; Arora, Manoj K.; Pal, Shilpa	Inclusion of earthquake strong ground motion in a geographic information system-based landslide susceptibility zonation in Garhwal Himalayas	Natural Hazards	regional landslide analysis	regional susceptibility/hazard assessment	ind_1	Chamoli	1999-03-28 19:05:11UTC	India
https://www.doi.org/10.1785/0120120055	474	2012	Jibson, R. W.; Harp, E. L.	Extraordinary Distance Limits of Landslides Triggered by the 2011 Mineral, Virginia, Earthquake	Bulletin of the Seismological Society of America	regional landslide analysis	regional mapping|regional landslide descriptive statistics	usa_16	Mineral	2011-08-23 17:51:04UTC	USA
https://www.doi.org/10.1007/s10346-012-0344-6	475	2012	Has, Baator; Noro, Tomoyuki; Maruyama, Kiyoteru; Nakamura, Akira; Ogawa, Kiichiro; Onoda, Satoshi	Characteristics of earthquake-induced landslides in a heavy snowfall region—landslides triggered by the northern Nagano prefecture earthquake, March 12, 2011, Japan	Landslides	regional landslide analysis	regional mapping	jap_5	Eastern Honshu (Great Tohoku Earthquake)	2011-03-11 05:46:24UTC	Japan
https://www.doi.org/10.1127/0372-8854/2012/0084	476	2012	Ramírez-Herrera, María Teresa; Inbar, Moshe; Paulín, Gabriel Legorreta	One hundred years of the rock fall triggered by the 1912 Acambay earthquake, Mexico	Zeitschrift für Geomorphologie	other|regional landslide analysis	regional mapping	mex_1	Acambay	1912-11-19	Mexico
https://www.doi.org/10.1016/j.enggeo.2015.12.008	477	2016	Zhang, Ming; Yin, Yueping; McSaveney, Mauri	Dynamics of the 2008 earthquake-triggered Wenjiagou Creek rock avalanche, Qingping, Sichuan, China	Engineering Geology	single landslide analysis	single failure mapping|single failure modelling|single failure geotechnical characterization	chin_1	Wenchuan-Sichuan	2008-05-12 06:28:01UTC	China
https://www.doi.org/10.1007/s10346-014-0531-8	478	2015	Budimir, M. E. A.; Atkinson, P. M.; Lewis, H. G.	Seismically induced landslide hazard and exposure modelling in Southern California based on the 1994 Northridge, California earthquake event	Landslides	regional landslide analysis	regional risk modelling	usa_4	Northridge	1994-01-17 12:30:55UTC	USA
https://www.doi.org/10.1007/s12517-015-1835-2	479	2015	Zhou, Suhua; Fang, Ligang; Liu, Baochen	Slope unit-based distribution analysis of landslides triggered by the April 20, 2013, Ms 7.0 Lushan earthquake	Arabian Journal of Geosciences	regional landslide analysis	regional mapping|regional landslide descriptive statistics|regional susceptibility/hazard assessment	chin_2	Lushan	2013-04-20 00:02:47UTC	China
https://www.doi.org/10.1007/s12517-014-1658-6	480	2015	Aghda, S. M. Fatemi; Bagheri, V.	Evaluation of earthquake-induced landslides hazard zonation methods: a case study of Sarein, Iran, earthquake (1997)	Arabian Journal of Geosciences	regional landslide analysis	regional mapping|regional susceptibility/hazard assessment	ira_5	Sarein	1997-02-28 12:57:18UTC	Iran
https://www.doi.org/10.1007/s11069-015-1816-5	481	2015	Elayaraja, S.; Chandrasekaran, S. S.; Ganapathy, G. P.	Evaluation of seismic hazard and potential of earthquake-induced landslides of the Nilgiris, India	Natural Hazards	regional landslide analysis	regional susceptibility/hazard assessment	Not Applicable	Not Applicable	Not Applicable	Not Applicable
https://www.doi.org/10.1016/j.enggeo.2014.06.004	482	2015	Qi, Shengwen; Lan, Hengxing; Dong, Jinyu	An analytical solution to slip buckling slope failure triggered by earthquake	Engineering Geology	single landslide analysis	single failure modelling	chin_1	Wenchuan-Sichuan	2008-05-12 06:28:01UTC	China
https://www.doi.org/10.1016/j.enggeo.2014.08.024	483	2015	Zhang, Yingbin; Wang, Jinmei; Xu, Qiang; Chen, Guangqi; X Zhao, John.; Zheng, Lu; Han, Zheng; Yu, Pengcheng	DDA validation of the mobility of earthquake-induced landslides	Engineering Geology	single landslide analysis	single failure modelling	chin_1	Wenchuan-Sichuan	2008-05-12 06:28:01UTC	China
https://www.doi.org/10.1007/s11204-015-9322-z	484	2015	Sun, Shu-Wei; Chen, Fu-Quan; Wang, Wei	Mechanism and Remediation of a Seismically Induced Landslide with a Potential for Deep Seated Sliding	Soil Mechanics and Foundation Engineering	single landslide analysis	single failure modelling	chin_1	Wenchuan-Sichuan	2008-05-12 06:28:01UTC	China
https://www.doi.org/10.1002/2014JF003417	485	2015	Brain, Matthew J.; Rosser, Nick J.; Sutton, Jerry; Snelling, Karl; Tunstall, Neil; Petley, David N.	The effects of normal and shear stress wave phasing on coseismic landslide displacement: Wave Phasing and Coseismic Landslides	Journal of Geophysical Research: Earth Surface	Not Applicable	Not Applicable	Not Applicable	Not Applicable	Not Applicable	Not Applicable
https://www.doi.org/10.1016/j.soildyn.2014.06.036	486	2015	Zhang, Yingbin; Zhang, Jue; Chen, Guangqi; Zheng, Lu; Li, Yange	Effects of vertical seismic force on initiation of the Daguangbao landslide induced by the 2008 Wenchuan earthquake	Soil Dynamics and Earthquake Engineering	single landslide analysis	single failure modelling	chin_1	Wenchuan-Sichuan	2008-05-12 06:28:01UTC	China
https://www.doi.org/10.1007/s12594-016-0378-9	487	2016	Singh, Harbans; Som, S. K.	Earthquake triggered landslide–Indian scenario	Journal of the Geological Society of India	regional landslide analysis	regional landslide comparison|regional landslide descriptive statistics	ind_1|pak_1|ind_2|ind_3|ind_4	Chamoli|Kashmir|Sikkim|Assam|Uttarkashi	1999-03-28 19:05:11UTC|2005-10-08 03:50:40 UTC|2011-09-18 12:40:51UTC|1897-06-12|1991-10-19 21:23:14UTC	India|Pakistan|India|India|India
https://www.doi.org/10.1016/j.soildyn.2015.02.001	488	2015	Guo, Deping; He, Chuan; Xu, Chong; Hamada, Masanori	Analysis of the relations between slope failure distribution and seismic ground motion during the 2008 Wenchuan earthquake	Soil Dynamics and Earthquake Engineering	regional landslide analysis	regional landslide descriptive statistics	chin_1	Wenchuan-Sichuan	2008-05-12 06:28:01UTC	China
https://www.doi.org/10.5194/nhess-16-497-2016	489	2016	Chang, Z. F.; Chen, X. L.; An, X. W.; Cui, J. W.	Contributing factors to the failure of an unusually large landslide triggered by the 2014 Ludian, Yunnan, China, &lt;i&gt;M&lt;/i&gt;&lt;sub&gt;s&lt;/sub&gt; = 6.5 earthquake	Natural Hazards and Earth System Sciences	single landslide analysis	single failure mapping	chin_5	Wenping (Ludian county)	2014-08-03 08:30:13UTC	China
https://www.doi.org/10.1080/17486025.2015.1082647	490	2016	Beyabanaki, S. Amir Reza; Bagtzoglou, Amvrossios C.; Liu, Lanbo	Applying disk-based discontinuous deformation analysis (DDA) to simulate Donghekou landslide triggered by the Wenchuan earthquake	Geomechanics and Geoengineering	single landslide analysis	single failure modelling	chin_1	Wenchuan-Sichuan	2008-05-12 06:28:01UTC	China
https://www.doi.org/10.1785/0120150172	491	2016	Chousianitis, Konstantinos; Del Gaudio, Vincenzo; Sabatakakis, Nikolaos; Kavoura, Katerina; Drakatos, George; Bathrellos, George D.; Skilodimou, Hariklia D.	Assessment of Earthquake‐Induced Landslide Hazard in Greece: From Arias Intensity to Spatial Distribution of Slope Resistance Demand	Bulletin of the Seismological Society of America	regional landslide analysis	regional susceptibility/hazard assessment	Not Applicable	Not Applicable	Not Applicable	Not Applicable
https://www.doi.org/10.1007/s12665-016-5277-2	492	2016	Beyabanaki, S. Amir Reza; Bagtzoglou, Amvrossios C.; Anagnostou, Emmanouil N.	Effects of groundwater table position, soil strength properties and rainfall on instability of earthquake-triggered landslides	Environmental Earth Sciences	Not Applicable	Not Applicable	Not Applicable	Not Applicable	Not Applicable	Not Applicable
https://www.doi.org/10.1007/s11069-015-2104-0	493	2016	Borfecchia, Flavio; De Canio, Gerardo; De Cecco, Luigi; Giocoli, Alessandro; Grauso, Sergio; La Porta, Luigi; Martini, Sandro; Pollino, Maurizio; Roselli, Ivan; Zini, Alessandro	Mapping the earthquake-induced landslide hazard around the main oil pipeline network of the Agri Valley (Basilicata, southern Italy) by means of two GIS-based modelling approaches	Natural Hazards	regional landslide analysis	regional susceptibility/hazard assessment	Not Applicable	Not Applicable	Not Applicable	Not Applicable
https://www.doi.org/10.1186/s40623-016-0425-1	494	2016	Sato, Hiroshi P.; Une, Hiroshi	Detection of the 2015 Gorkha earthquake-induced landslide surface deformation in Kathmandu using InSAR images from PALSAR-2 data	Earth, Planets and Space	regional landslide analysis	regional mapping	nep_1	Gorkha	2015-04-25 06:11:25UTC	Nepal
https://www.doi.org/10.3390/ijgi5040046	495	2016	Zhou, Suhua; Chen, Guangqi; Fang, Ligang	Distribution Pattern of Landslides Triggered by the 2014 Ludian Earthquake of China: Implications for Regional Threshold Topography and the Seismogenic Fault Identification	ISPRS International Journal of Geo-Information	regional landslide analysis	regional mapping|regional landslide descriptive statistics	chin_5	Wenping (Ludian county)	2014-08-03 08:30:13UTC	China
https://www.doi.org/10.1785/0120150141	496	2016	Jibson, Randall W.; Harp, Edwin L.	Ground Motions at the Outermost Limits of Seismically Triggered Landslides	Bulletin of the Seismological Society of America	regional landslide analysis	regional landslide comparison	usa_14|usa_15|usa_16|usa_4|gua_1|usa_6	Whittier Narrows|Superstition Hills|Mineral|Northridge|Guatemala|Coalinga, California (Central California)	1987-10-01 14:42:20UTC|1987-11-24 13:15:56UTC|2011-08-23 17:51:04UTC|1994-01-17 12:30:55UTC|1976-02-04 09:01:43UTC|1983-05-02 23:42:38UTC	USA|USA|USA|USA|Guatemala|USA
https://www.doi.org/10.1111/1755-6724.12687	497	2016	Suhua, Zhou; Wei, Wang; Guangqi, Chen; Baochen, Liu; Ligang, Fang	A Combined Weight of Evidence and Logistic Regression Method for Susceptibility Mapping of Earthquake-induced Landslides: A Case Study of the April 20, 2013 Lushan Earthquake, China	Acta Geologica Sinica - English Edition	regional landslide analysis	regional mapping|regional susceptibility/hazard assessment	chin_2	Lushan	2013-04-20 00:02:47UTC	China
https://www.doi.org/10.1016/j.geomorph.2016.01.004	498	2016	Wang, Ying; Song, Chongzhen; Lin, Qigen; Li, Juan	Occurrence probability assessment of earthquake-triggered landslides with Newmark displacement values and logistic regression: The Wenchuan earthquake, China	Geomorphology	regional landslide analysis	regional risk modelling|regional susceptibility/hazard assessment	chin_1	Wenchuan-Sichuan	2008-05-12 06:28:01UTC	China
https://www.doi.org/10.1007/s12665-016-5474-z	499	2016	Lo, Chia-Ming; Huang, Wei-Kai; Lin, Ming-Lang	Earthquake-induced deep-seated landslide and landscape evolution process at Hungtsaiping, Nantou County, Taiwan	Environmental Earth Sciences	single landslide analysis	single failure modelling	taiw_1	Chi Chi	1999-09-20 17:47:18UTC	Taiwan
https://www.doi.org/10.1111/1755-6724.12693	500	2016	Jiamei, Liu; Mengtan, Gao; Shuren, Wu; Tao, Wang; Jian, Wu	A Hazard Assessment Method for Potential Earthquake-Induced Landslides - A Case Study in Huaxian County, Shaanxi Province	Acta Geologica Sinica - English Edition	regional landslide analysis	regional susceptibility/hazard assessment	Not Applicable	Not Applicable	Not Applicable	Not Applicable
https://www.doi.org/10.1016/j.enggeo.2016.02.004	501	2016	Saade, Angela; Abou-Jaoude, Grace; Wartman, Joseph	Regional-scale co-seismic landslide assessment using limit equilibrium analysis	Engineering Geology	regional landslide analysis	regional susceptibility/hazard assessment	usa_4	Northridge	1994-01-17 12:30:55UTC	USA
https://www.doi.org/10.1007/s12665-016-5576-7	502	2016	Xu, Chong; Shen, Lingling; Wang, Genlong	Soft computing in assessment of earthquake-triggered landslide susceptibility	Environmental Earth Sciences	regional landslide analysis	regional susceptibility/hazard assessment	chin_3	Minxian-Zhangxian	2013-07-21 23:45:56UTC	China
https://www.doi.org/10.1007/s11707-015-0517-4	503	2016	Shen, Lingling; Xu, Chong; Liu, Lianyou	Interaction among controlling factors for landslides triggered by the 2008 Wenchuan, China Mw 7.9 earthquake	Frontiers of Earth Science	regional landslide analysis	regional landslide descriptive statistics	chin_1	Wenchuan-Sichuan	2008-05-12 06:28:01UTC	China
https://www.doi.org/10.1007/s11629-015-3441-x	504	2016	Abuzied, Sara; Ibrahim, Samia; Kaiser, Mona; Saleem, Tarek	Geospatial susceptibility mapping of earthquake-induced landslides in Nuweiba area, Gulf of Aqaba, Egypt	Journal of Mountain Science	regional landslide analysis	regional susceptibility/hazard assessment	Not Applicable	Not Applicable	Not Applicable	Not Applicable
https://www.doi.org/10.1007/s12303-015-0056-8	505	2016	Yan, Zhenzhen; Du, Xiaoping; Fan, Xiangtao	Parallel numerical analysis of the failure characteristics of earthquake-induced landslides	Geosciences Journal	single landslide analysis	single failure modelling	chin_1	Wenchuan-Sichuan	2008-05-12 06:28:01UTC	China
https://www.doi.org/10.1038/srep29797	506	2016	Xu, Chong; Xu, Xiwei; Shen, Lingling; Yao, Qi; Tan, Xibin; Kang, Wenjun; Ma, Siyuan; Wu, Xiyan; Cai, Juntao; Gao, Mingxing; Li, Kang	Optimized volume models of earthquake-triggered landslides	Scientific Reports	regional landslide analysis	regional susceptibility/hazard assessment	chin_1	Wenchuan-Sichuan	2008-05-12 06:28:01UTC	China
https://www.doi.org/10.1007/s10706-011-9411-3	507	2011	Gratchev, Ivan B.; Towhata, Ikuo	Analysis of the mechanisms of slope failures triggered by the 2007 Chuetsu Oki earthquake	Geotechnical and Geological Engineering	single landslide analysis	single failure geotechnical characterization|single failure modelling	jap_11	20 km NNW of Kashiwazaki	2007-07-16 01:13:22UTC	Japan
https://www.doi.org/10.1007/s11629-011-2074-y	508	2011	Wu, Yong; He, Siming; Luo, Yu; Li, Xinpo	Failure mechanisms of post-earthquake bedrock landslides in response to rainfall infiltration	Journal of Mountain Science	single landslide analysis	single failure modelling	Not Applicable	Not Applicable	Not Applicable	Not Applicable
https://www.doi.org/10.1007/s10346-010-0226-8	509	2011	Miyagi, Toyohiko; Yamashina, Shinichi; Esaka, Fumitoshi; Abe, Shinro	Massive landslide triggered by 2008 Iwate–Miyagi inland earthquake in the Aratozawa Dam area, Tohoku, Japan	Landslides	single landslide analysis	single failure mapping	jap_4	Iwate–Miyagi Nairiku (eastern Honshu, Japan)	2008-06-13 23:43:45UTC	Japan
https://www.doi.org/10.1007/s10346-010-0236-6	510	2011	Chen, Xiao Qing; Cui, Peng; Li, Yong; Zhao, Wan Yu	Emergency response to the Tangjiashan landslide-dammed lake resulting from the 2008 Wenchuan Earthquake, China	Landslides	single landslide analysis	single failure impact/risk modelling	chin_1	Wenchuan-Sichuan	2008-05-12 06:28:01UTC	China
https://www.doi.org/10.1007/s11069-010-9587-5	511	2011	Miles, Scott B.	Participatory model assessment of earthquake-induced landslide hazard models	Natural Hazards	regional landslide analysis	regional susceptibility/hazard assessment	Not Applicable	Not Applicable	Not Applicable	Not Applicable
https://www.doi.org/10.1016/j.jseaes.2010.04.010	512	2011	Dai, F.C.; Xu, C.; Yao, X.; Xu, L.; Tu, X.B.; Gong, Q.M.	Spatial distribution of landslides triggered by the 2008 Ms 8.0 Wenchuan earthquake, China	Journal of Asian Earth Sciences	regional landslide analysis	regional mapping|regional landslide descriptive statistics	chin_1	Wenchuan-Sichuan	2008-05-12 06:28:01UTC	China
https://www.doi.org/10.1007/s11629-011-2105-8	513	2011	Xu, Qiang; Zhang, Shuai; Li, Weile	Spatial distribution of large-scale landslides induced by the 5.12 Wenchuan Earthquake	Journal of Mountain Science	regional landslide analysis	regional mapping|regional landslide descriptive statistics	chin_1	Wenchuan-Sichuan	2008-05-12 06:28:01UTC	China
https://www.doi.org/10.1007/s11629-011-2089-4	514	2011	Nakasuji, Akito	Landslide hazard mapping during a large scale earthquake	Journal of Mountain Science	regional landslide analysis	regional susceptibility/hazard assessment	jap_1	Niigata-Chuetsu	2004-10-23 08:56:00UTC	Japan
https://www.doi.org/10.1007/s11629-011-2104-9	515	2011	Huang, Runqiu; Xu, Qiang; Huo, Junjie	Mechanism and geo-mechanics models of landslides triggered by 5.12 Wenchuan Earthquake	Journal of Mountain Science	single landslide analysis	single failure geotechnical characterization	chin_1	Wenchuan-Sichuan	2008-05-12 06:28:01UTC	China
https://www.doi.org/10.1007/s11629-011-2112-9	516	2011	Sun, Ping; Zhang, Yongshuang; Shi, Jusong; Chen, Liwei	Analysis on the dynamical process of Donghekou rockslide-debris flow triggered by 5.12 Wenchuan earthquake	Journal of Mountain Science	single landslide analysis	single failure geotechnical characterization	chin_1	Wenchuan-Sichuan	2008-05-12 06:28:01UTC	China
https://www.doi.org/10.1659/MRD-JOURNAL-D-10-00110.1	517	2011	Sudmeier-Rieux, Karen; Jaboyedoff, Michel; Breguet, Alain; Dubois, Jérôme	The 2005 Pakistan Earthquake Revisited: Methods for Integrated Landslide Assessment	Mountain Research and Development	regional landslide analysis	regional risk modelling	pak_1	Kashmir	2005-10-08 03:50:40UTC	Pakistan
https://www.doi.org/10.1007/s00531-010-0514-5	518	2011	Bozzano, F.; Lenti, L.; Martino, Salvatore; Paciello, A.; Scarascia Mugnozza, G.	Evidences of landslide earthquake triggering due to self-excitation process	International Journal of Earth Sciences	single landslide analysis	single failure modelling	ita_3	Offshore Sicily	2002-09-06 01:21:28UTC	Italy
https://www.doi.org/10.1007/s11589-011-0793-3	519	2011	Wang, Xiuying; Nie, Gaozhong; Ma, Mujun	Evaluation model of landslide hazards induced by the 2008 Wenchuan earthquake using strong motion data	Earthquake Science	regional landslide analysis	regional susceptibility/hazard assessment	chin_1	Wenchuan-Sichuan	2008-05-12 06:28:01UTC	China
https://www.doi.org/10.1007/s10346-010-0241-9	520	2011	Sattar, Ahsan; Konagai, Kazuo; Kiyota, Takashi; Ikeda, Takaaki; Johansson, Jorgen	Measurement of debris mass changes and assessment of the dam-break flood potential of earthquake-triggered Hattian landslide dam	Landslides	single landslide analysis	single failure modelling	pak_1	Kashmir	2005-10-08 03:50:40UTC	Pakistan
https://www.doi.org/10.1142/S0219876211002563	521	2011	Wu, Aiqing; Yang, Qigui; Ma, Guisheng; Lu, Bo; Li, Xiaojun	Study on the formation mechanism of Tangjiashan landslide triggered by Wenchuan earthquake using DDA simulation	International Journal of Computational Methods	single landslide analysis	single failure mapping|single failure geotechnical characterization|single failure modelling	chin_1	Wenchuan-Sichuan	2008-05-12 06:28:01UTC	China
https://www.doi.org/10.1016/j.geomorph.2011.02.025	522	2011	Bozzano, Francesca; Lenti, Luca; Martino, Salvatore; Montagna, Alfredo; Paciello, Antonella	Earthquake triggering of landslides in highly jointed rock masses: Reconstruction of the 1783 Scilla rock avalanche (Italy)	Geomorphology	Not Applicable	historical/Holocene landslides	ita_13	Terremoto delle Calabrie	1783-02-06	Italy
https://www.doi.org/10.1007/s10518-010-9234-2	523	2011	Kaynia, Amir M.; Skurtveit, Elin; Saygili, Gokhan	Real-time mapping of earthquake-induced landslides	Bulletin of Earthquake Engineering	regional landslide analysis	regional susceptibility/hazard assessment	ita_1	Irpinia	1980-11-23 18:34:53UTC	Italy
https://www.doi.org/10.1016/j.soildyn.2011.04.008	524	2011	Delgado, J.; Peláez, J.A.; Tomás, R.; García-Tortosa, F.J.; Alfaro, P.; López Casado, C.	Seismically-induced landslides in the Betic Cordillera (S Spain)	Soil Dynamics and Earthquake Engineering	regional landslide analysis	regional landslide descriptive statistics	Not Applicable	Not Applicable	Not Applicable	Not Applicable
https://www.doi.org/10.1007/s10346-011-0265-9	525	2011	Zhang, Ming; Yin, Yueping; Wu, Shuren; Zhang, Yongshuang; Han, Jinliang	Dynamics of the Niumiangou Creek rock avalanche triggered by 2008 Ms 8.0 Wenchuan earthquake, Sichuan, China	Landslides	single landslide analysis	single failure mapping	chin_1	Wenchuan-Sichuan	2008-05-12 06:28:01UTC	China
https://www.doi.org/10.1007/s10346-011-0256-x	526	2011	Chang, D. S.; Zhang, L. M.; Xu, Y.; Huang, R. Q.	Field testing of erodibility of two landslide dams triggered by the 12 May Wenchuan earthquake	Landslides	single landslide analysis	single failure geotechnical characterization	chin_1	Wenchuan-Sichuan	2008-05-12 06:28:01UTC	China
https://www.doi.org/10.1016/j.enggeo.2010.06.013	527	2011	Harp, Edwin L.; Keefer, David K.; Sato, Hiroshi P.; Yagi, Hiroshi	Landslide inventories: The essential part of seismic landslide hazard analyses	Engineering Geology	regional landslide analysis	regional mapping|regional landslide comparison	Not Applicable	Not Applicable	Not Applicable	Not Applicable
https://www.doi.org/10.1016/j.enggeo.2011.04.008	528	2011	Wang, Kuo-Lung; Lin, Meei-Ling	Initiation and displacement of landslide induced by earthquake — a study of shaking table model slope test	Engineering Geology	single landslide analysis	single failure modelling	Not Applicable	Not Applicable	Not Applicable	Not Applicable
https://www.doi.org/10.1016/j.enggeo.2011.03.013	529	2011	Tang, Chuan; Zhu, Jing; Qi, Xin; Ding, Jun	Landslides induced by the Wenchuan earthquake and the subsequent strong rainfall event: A case study in the Beichuan area of China	Engineering Geology	regional landslide analysis	regional mapping	chin_1	Wenchuan-Sichuan	2008-05-12 06:28:01UTC	China
https://www.doi.org/10.1016/j.enggeo.2011.06.001	530	2011	Wasowski, Janusz; Keefer, David K.; Lee, Chyi-Tyi	Toward the next generation of research on earthquake-induced landslides: Current issues and future challenges	Engineering Geology	other		Not Applicable	Not Applicable	Not Applicable	Not Applicable
https://www.doi.org/10.1016/j.quaint.2011.04.002	531	2011	Kamai, Toshitaka; Sangawa, Akira	Landslides on ancient embankments in the Kinki district (Japan): Strong motion seismoscope of the 1596 Keichou-Fushimi earthquake	Quaternary International	Not Applicable	historical/Holocene landslides	jap_13	Keichou-Fushimi	1596	Japan
https://www.doi.org/10.1016/j.quaint.2010.11.027	532	2011	Rodríguez-Peces, Martín J.; García-Mayordomo, Julián; Azañón, José M.; Insua Arévalo, Juan M.; Pintor, Juan Jiménez	Constraining pre-instrumental earthquake parameters from slope stability back-analysis: Palaeoseismic reconstruction of the Güevéjar landslide during the 1st November 1755 Lisbon and 25th December 1884 Arenas del Rey earthquakes	Quaternary International	Not Applicable	historical/Holocene landslides	por_2|spa_2	Lisboa|Arenas del Rey	1755-11-01|1884-12-25	Portugal|Spain
https://www.doi.org/10.1007/s11629-011-2133-4	533	2011	Fan, Jianrong; Li, Xiuzhen; Guo, Fenfen; Guo, Xiang	Empirical-statistical models based on remote sensing for estimating the volume of landslides induced by the Wenchuan earthquake	Journal of Mountain Science	regional landslide analysis	regional landslide descriptive statistics	chin_1	Wenchuan-Sichuan	2008-05-12 06:28:01UTC	China
https://www.doi.org/10.3208/sandf.51.929	534	2011	Deng, Jianliang; Kameya, Hiroshi; Miyashita, Yukika; Kuwano, Jiro; Kuwano, Reiko; Koseki, Junichi	Study on Dip Slope Failure at Higashi Takezawa Induced by 2004 Niigata-Ken Chuetsu Earthquake	Soils and Foundations	single landslide analysis	single failure geotechnical characterization|single failure modelling	jap_1	Niigata-Chuetsu	2004-10-23 08:56:00UTC	Japan
https://www.doi.org/10.1016/j.enggeo.2011.05.010	535	2011	Mousavi, S. Mostafa; Omidvar, Babak; Ghazban, Fereydon; Feyzi, Reza	Quantitative risk analysis for earthquake-induced landslides—Emamzadeh Ali, Iran	Engineering Geology	single landslide analysis	single failure modelling|single failure impact/risk modelling	Not Applicable	Not Applicable	Not Applicable	Not Applicable
https://www.doi.org/10.1016/j.geomorph.2010.12.030	536	2011	Gorum, Tolga; Fan, Xuanmei; van Westen, Cees J.; Huang, Run Qiu; Xu, Qiang; Tang, Chuan; Wang, Gonghui	Distribution pattern of earthquake-induced landslides triggered by the 12 May 2008 Wenchuan earthquake	Geomorphology	regional landslide analysis	regional mapping|regional landslide descriptive statistics	chin_1	Wenchuan-Sichuan	2008-05-12 06:28:01UTC	China
https://www.doi.org/10.1016/j.geomorph.2010.12.031	537	2011	Chen, Hongey; Lin, Guan-Wei; Lu, Ming-Hsiang; Shih, Tsun-Ying; Horng, Ming-Jame; Wu, Shuei-Ji; Chuang, Bin	Effects of topography, lithology, rainfall and earthquake on landslide and sediment discharge in mountain catchments of southeastern Taiwan	Geomorphology	regional landslide analysis	regional susceptibility/hazard assessment	Not Applicable	Not Applicable	Not Applicable	Not Applicable
https://www.doi.org/10.1007/s11069-011-9829-1	538	2011	Rajabi, Ali M.; Mahdavifar, Mohammad R.; Khamehchiyan, M.; Del Gaudio, V.	A new empirical estimator of coseismic landslide displacement for Zagros Mountain region (Iran)	Natural Hazards	regional landslide analysis	regional susceptibility/hazard assessment	Not Applicable	Not Applicable	Not Applicable	Not Applicable
https://www.doi.org/10.1007/s11069-011-9820-x	539	2011	Rodríguez-Peces, Martín Jesús; Pérez-García, José Luis; García-Mayordomo, Julián; Azañón, José Miguel; Insua-Arévalo, Juan Miguel; Delgado-García, Jorge	Applicability of Newmark method at regional, sub-regional and site scales: seismically induced Bullas and La Paca rock-slide cases (Murcia, SE Spain)	Natural Hazards	regional landslide analysis|single landslide analysis	regional susceptibility/hazard assessment|single failure mapping|single failure geotechnical characterization|single failure modelling	spa_4|spa_5	Bullas|La Paca	2002-08-06 06:16:18UTC|2005-01-29 07:41:31UTC	Spain|Spain
https://www.doi.org/10.1016/j.enggeo.2011.03.014	540	2011	Shou, K.J.; Hong, C.Y.; Wu, C.C.; Hsu, H.Y.; Fei, L.Y.; Lee, J.F.; Wei, C.Y.	Spatial and temporal analysis of landslides in Central Taiwan after 1999 Chi-Chi earthquake	Engineering Geology	regional landslide analysis	regional mapping	Not Applicable	Not Applicable	Not Applicable	Not Applicable
https://www.doi.org/10.5459/bnzsee.44.4.227-238	541	2011	Dellow, G.; Yetton, M.; Massey, C.; Archibald, G.; Barrell, D.J.A.; Bell, D.; Bruce, Z.; Campbell, A.; Davies, T.; De Pascale, G.; Easton, M.; Forsyth, P.J.; Gibbons, C.; Glassey, P.; Grant, H.; Green, R.; Hancox, G.; Jongens, R.; Kingsbury, P.; Kupec, J.; Macfarlane, D.; McDowell, B.; McKelvey, B.; McCahon, I.; McPherson, I.; Molloy, J.; Muirson, J.; O’Halloran, M.; Perrin, N.; Price, C.; Read, …	Landslides caused by the 22 February 2011 Christchurch earthquake and management of landslide risk in the immediate aftermath	Bulletin of the New Zealand Society for Earthquake Engineering	regional landslide analysis	regional mapping	nze_2	Christchurch	2011-02-21 23:51:42UTC	New Zealand
https://www.doi.org/10.1007/s10346-011-0262-z	542	2011	Ayalew, Lulseged; Kasahara, Minoru; Yamagishi, Hiromitsu	The spatial correlation between earthquakes and landslides in Hokkaido (Japan), a GIS-based analysis of the past and the future	Landslides	regional landslide analysis	regional susceptibility/hazard assessment|regional landslide comparison	Not Applicable	Not Applicable	Not Applicable	Not Applicable
https://www.doi.org/10.1142/S1793431111001194	543	2011	Cui, Peng; Zhu, Xinghua	Surge generation in reservoirs by landslides triggered by the Wenchuan earthquake	Journal of Earthquake and Tsunami	single landslide analysis	single failure modelling	chin_1	Wenchuan-Sichuan	2008-05-12 06:28:01UTC	China
https://www.doi.org/10.4408/IJEGE.2012-02.O-05	544	2012	Fortunato, C.; Martino, S.; Prestininzi, A.; Romeo, R.W.; Fantini, A.; Sarandrea, P.	Nuova versione del catalogo italiano degli effetti deformativi indotti da forti terremoti (CEDIT)	Italian Journal of Engineering Geology and Environment	other		Not Applicable	Not Applicable	Not Applicable	Not Applicable
https://www.doi.org/10.1080/01431161.2010.512948	545	2012	Parvaiz, I.; Champatiray, P. K.; Bhat, F. A.; Dadhwal, V. K.	Earthquake-induced landslide dam in the Kashmir Himalayas	International Journal of Remote Sensing	single landslide analysis	single failure mapping	pak_1	Kashmir	2005-10-08 03:50:40UTC	Pakistan
https://www.doi.org/10.1080/01431161.2011.638338	546	2012	Shou, Keh-Jian; Fei, Li-Yuan; Lee, Jiin-Fa; Wei, Cheng-Yueh; Huang, Sheng-Tsi; Lin, You-Chang	Landslides and catchment sedimentation in the Ta-Chia River influenced by the 1999 Taiwan Chi-Chi earthquake	International Journal of Remote Sensing	Not Applicable	rainfall-induced landslides	Not Applicable	Not Applicable	Not Applicable	Not Applicable
https://www.doi.org/10.5194/nhess-12-527-2012	547	2012	Fang, H.; Cui, P.; Pei, L. Z.; Zhou, X. J.	Model testing on rainfall-induced landslide of loose soil in Wenchuan earthquake region	Natural Hazards and Earth System Sciences	Not Applicable	rainfall-induced landslides	chin_1	Wenchuan-Sichuan	2008-05-12 06:28:01UTC	China
https://www.doi.org/10.5194/nhess-12-351-2012	548	2012	Chen, X. L.; Zhou, Q.; Ran, H.; Dong, R.	Earthquake-triggered landslides in southwest China	Natural Hazards and Earth System Sciences	regional landslide analysis	regional landslide comparison	Not Applicable	Not Applicable	Not Applicable	Not Applicable
https://www.doi.org/10.5194/nhess-12-2719-2012	549	2012	Li, Y.; Chen, G.; Tang, C.; Zhou, G.; Zheng, L.	Rainfall and earthquake-induced landslide susceptibility assessment using GIS and Artificial Neural Network	Natural Hazards and Earth System Sciences	regional landslide analysis	regional susceptibility/hazard assessment	chin_1	Wenchuan-Sichuan	2008-05-12 06:28:01UTC	China
https://www.doi.org/10.5194/nhess-12-3645-2012	550	2012	Chen, X. L.; Ran, H. L.; Yang, W. T.	Evaluation of factors controlling large earthquake-induced landslides by the Wenchuan earthquake	Natural Hazards and Earth System Sciences	single landslide analysis	single failure geotechnical characterization	chin_1	Wenchuan-Sichuan	2008-05-12 06:28:01UTC	China
https://www.doi.org/10.1007/s12583-012-0236-7	551	2012	Xu, Chong; Xu, Xiwei; Dai, Fuchu; Xiao, Jianzhang; Tan, Xibin; Yuan, Renmao	Landslide hazard mapping using GIS and weight of evidence model in Qingshui River watershed of 2008 Wenchuan earthquake struck region	Journal of Earth Science	regional landslide analysis	regional susceptibility/hazard assessment	chin_1	Wenchuan-Sichuan	2008-05-12 06:28:01UTC	China
https://www.doi.org/10.1007/s12665-010-0749-2	552	2012	Cui, Peng; Dang, Chao; Zhuang, Jian-qi; You, Yong; Chen, Xiao-qing; Scott, Kevin M.	Landslide-dammed lake at Tangjiashan, Sichuan province, China (triggered by the Wenchuan Earthquake, May 12, 2008): risk assessment, mitigation strategy, and lessons learned	Environmental Earth Sciences	single landslide analysis	single failure impact/risk modelling	chin_1	Wenchuan-Sichuan	2008-05-12 06:28:01UTC	China
https://www.doi.org/10.1007/s12665-011-0953-8	553	2012	Li, Xinpo; He, Siming; Luo, Yu; Wu, Yong	Simulation of the sliding process of Donghekou landslide triggered by the Wenchuan earthquake using a distinct element method	Environmental Earth Sciences	single landslide analysis	single failure modelling	chin_1	Wenchuan-Sichuan	2008-05-12 06:28:01UTC	China
https://www.doi.org/10.1007/s12665-011-0952-9	554	2012	Wu, S. R.; Shi, J. S.; Wang, H. B.	Analysis of activity intensity for landslides triggered by the Wenchuan earthquake, Sichuan Province, China	Environmental Earth Sciences	regional landslide analysis|single landslide analysis	single failure impact/risk modelling|regional landslide comparison	chin_1	Wenchuan-Sichuan	2008-05-12 06:28:01UTC	China
https://www.doi.org/10.1007/s10064-010-0344-5	555	2012	Papathanassiou, George	Estimating slope failure potential in an earthquake prone area: a case study at Skolis Mountain, NW Peloponnesus, Greece	Bulletin of Engineering Geology and the Environment	regional landslide analysis	regional susceptibility/hazard assessment	gre_3	15 km ESE of Várda	2008-06-08 12:25:29UTC	Greece
https://www.doi.org/10.1016/j.enggeo.2011.12.010	556	2012	Collins, Brian D.; Kayen, Robert; Tanaka, Yasuo	Spatial distribution of landslides triggered from the 2007 Niigata Chuetsu–Oki Japan Earthquake	Engineering Geology	regional landslide analysis	regional mapping|regional landslide descriptive statistics	jap_11	20 km NNW of Kashiwazaki	2007-07-16 01:13:22UTC	Japan
https://www.doi.org/10.1007/s10346-011-0276-6	557	2012	Huang, Runqiu; Pei, Xiangjun; Fan, Xuanmei; Zhang, Weifeng; Li, Shigui; Li, Biliang	The characteristics and failure mechanism of the largest landslide triggered by the Wenchuan earthquake, May 12, 2008, China	Landslides	single landslide analysis	single failure mapping|single failure geotechnical characterization	chin_1	Wenchuan-Sichuan	2008-05-12 06:28:01UTC	China
https://www.doi.org/10.1007/s12583-012-0248-3	558	2012	Basharat, Muhammad; Rohn, Joachim; Ehret, Dominik; Baig, Mirza Shahid	Lithological and structural control of Hattian Bala rock avalanche triggered by the Kashmir earthquake 2005, sub-Himalayas, northern Pakistan	Journal of Earth Science	single landslide analysis	single failure mapping	pak_1	Kashmir	2005-10-08 03:50:40UTC	Pakistan
https://www.doi.org/10.1016/j.cageo.2011.09.011	559	2012	Song, Yiquan; Gong, Jianhua; Gao, Sheng; Wang, Dongchuan; Cui, Tiejun; Li, Yi; Wei, Baoquan	Susceptibility assessment of earthquake-induced landslides using Bayesian network: A case study in Beichuan, China	Computers & Geosciences	regional landslide analysis	regional susceptibility/hazard assessment	chin_1	Wenchuan-Sichuan	2008-05-12 06:28:01UTC	China
https://www.doi.org/10.1016/j.geomorph.2012.02.002	560	2012	Iwahashi, Junko; Kamiya, Izumi; Yamagishi, Hiromitsu	High-resolution DEMs in the study of rainfall- and earthquake-induced landslides: Use of a variable window size method in digital terrain analysis	Geomorphology	regional landslide analysis	regional susceptibility/hazard assessment	jap_4	Iwate–Miyagi Nairiku (eastern Honshu, Japan)	2008-06-13 23:43:45UTC	Japan
https://www.doi.org/10.1016/j.enggeo.2012.04.002	561	2012	Alfaro, P.; Delgado, J.; García-Tortosa, F.J.; Lenti, L.; López, J.A.; López-Casado, C.; Martino, S.	Widespread landslides induced by the Mw 5.1 earthquake of 11 May 2011 in Lorca, SE Spain	Engineering Geology	regional landslide analysis	regional mapping|regional landslide descriptive statistics	spa_1	Murcia	2011-05-11 16:47:25UTC	Spain
https://www.doi.org/10.1007/s12665-012-1624-0	562	2012	Xu, Chong; Xu, Xiwei; Lee, Yuan Hsi; Tan, Xibin; Yu, Guihua; Dai, Fuchu	The 2010 Yushu earthquake triggered landslide hazard mapping using GIS and weight of evidence modeling	Environmental Earth Sciences	regional landslide analysis	regional susceptibility/hazard assessment	chin_6	Yushu (southern Qinghai)	2010-04-13 23:49:38UTC	China
https://www.doi.org/10.1007/s11589-012-0856-0	563	2012	Wang, Xiuying; Nie, Gaozhong; Wang, Song	Analysis of landslide damage caused by the 2008 Wenchuan earthquake using strong motion data: A case study in the Beichuan county town	Earthquake Science	regional landslide analysis	regional risk modelling	chin_1	Wenchuan-Sichuan	2008-05-12 06:28:01UTC	China
https://www.doi.org/10.1016/j.cageo.2012.01.002	564	2012	Xu, Chong; Xu, Xiwei; Dai, Fuchu; Saraf, Arun K.	Comparison of different models for susceptibility mapping of earthquake triggered landslides related with the 2008 Wenchuan earthquake in China	Computers & Geosciences	regional landslide analysis	regional susceptibility/hazard assessment	chin_1	Wenchuan-Sichuan	2008-05-12 06:28:01UTC	China
https://www.doi.org/10.1016/j.jseaes.2012.06.002	565	2012	Fan, Xuanmei; van Westen, Cees J.; Xu, Qiang; Gorum, Tolga; Dai, Fuchu	Analysis of landslide dams induced by the 2008 Wenchuan earthquake	Journal of Asian Earth Sciences	Not Applicable	water environment landslides	chin_1	Wenchuan-Sichuan	2008-05-12 06:28:01UTC	China
https://www.doi.org/10.1007/s11629-012-2434-2	566	2012	Huang, Ming-Wey; Chen, Chien-Yuan; Wu, Tzu-Hsiu; Chang, Chi-Ling; Liu, Sheu-Yien; Kao, Ching-Yun	GIS-based evaluation on the fault motion-induced coseismic landslides	Journal of Mountain Science	regional landslide analysis	regional susceptibility/hazard assessment	taiw_1	Chi Chi	1999-09-20 17:47:18UTC	Taiwan
https://www.doi.org/10.1016/j.geomorph.2012.05.003	567	2012	Fan, Xuanmei; van Westen, Cees J.; Korup, Oliver; Gorum, Tolga; Xu, Qiang; Dai, Fuchu; Huang, Runqiu; Wang, Gonghui	Transient water and sediment storage of the decaying landslide dams induced by the 2008 Wenchuan earthquake, China	Geomorphology	Not Applicable	water environment landslides	chin_1	Wenchuan-Sichuan	2008-05-12 06:28:01UTC	China
https://www.doi.org/10.1016/j.catena.2012.06.012	568	2012	Bai, Shibiao; Wang, Jian; Zhang, Zhigang; Cheng, Chen	Combined landslide susceptibility mapping after Wenchuan earthquake at the Zhouqu segment in the Bailongjiang Basin, China	Catena	regional landslide analysis	regional susceptibility/hazard assessment	chin_1	Wenchuan-Sichuan	2008-05-12 06:28:01UTC	China
https://www.doi.org/10.1130/G36961.1	569	2015	Marc, O.; Hovius, N.; Meunier, P.; Uchida, T.; Hayashi, S.	Transient changes of landslide rates after earthquakes	Geology	regional landslide analysis	regional landslide comparison	png_1|taiw_1|jap_1|jap_4	Ramu-Markham Valley|Chi Chi|Niigata-Chuetsu|Iwate–Miyagi Nairiku (eastern Honshu, Japan)	1993-10-13 02:06:00UTC|1999-09-20 17:47:18UTC|2004-10-23 08:56:00UTC|2008-06-13 23:43:45UTC	Papua New Guinea|Taiwan|Japan|Japan
https://www.doi.org/10.1016/j.rse.2015.05.010	570	2015	Lacroix, Pascal; Berthier, Etienne; Maquerhua, Edu Taipe	Earthquake-driven acceleration of slow-moving landslides in the Colca valley, Peru, detected from Pléiades images	Remote Sensing of Environment	regional landslide analysis	regional mapping|regional landslide comparison	per_4	3 km ESE of Maca	2013-07-17 02:37:43UTC	Peru
https://www.doi.org/10.1007/s12665-014-3939-5	571	2015	Huang, Yu; Yu, Miao; Xu, Qiang; Sawada, Kazuhide; Moriguchi, Shuji; Yashima, Atsushi; Liu, Chengwei; Xue, Long	InSAR-derived digital elevation models for terrain change analysis of earthquake-triggered flow-like landslides based on ALOS/PALSAR imagery	Environmental Earth Sciences	single landslide analysis	single failure mapping	chin_1	Wenchuan-Sichuan	2008-05-12 06:28:01UTC	China
https://www.doi.org/10.1007/s12583-016-0684-6	572	2016	Xu, Chong; Xu, Xiwei; Tian, Yingying; Shen, Lingling; Yao, Qi; Huang, Xueqiang; Ma, Junxue; Chen, Xi; Ma, Siyuan	Two comparable earthquakes produced greatly different coseismic landslides: The 2015 Gorkha, Nepal and 2008 Wenchuan, China events	Journal of Earth Science	regional landslide analysis	regional landslide comparison	nep_1|chin_1	Gorkha|Wenchuan-Sichuan	2015-04-25 06:11:25UTC|2008-05-12 06:28:01UTC	Nepal|China
https://www.doi.org/10.1007/s11069-016-2611-7	573	2017	Di, Baofeng; Stamatopoulos, Constantine A.; Dandoulaki, Miranda; Stavrogiannopoulou, Eleni; Zhang, Meng; Bampina, Persefoni	A method predicting the earthquake-induced landslide risk by back analyses of past landslides and its application in the region of the Wenchuan 12/5/2008 earthquake	Natural Hazards	regional landslide analysis	regional risk modelling	chin_1	Wenchuan-Sichuan	2008-05-12 06:28:01UTC	China
https://www.doi.org/10.1016/j.geomorph.2017.07.030	574	2017	Chen, Chi-Wen; Iida, Tomoyuki; Yamada, Ryuji	Effects of active fault types on earthquake-induced deep-seated landslides: A study of historical cases in Japan	Geomorphology	regional landslide analysis	regional landslide descriptive statistics	Not Applicable	Not Applicable	Not Applicable	Not Applicable
https://www.doi.org/10.3390/ijgi6110365	575	2017	Shrestha, Suchita; Kang, Tae-Seob; Suwal, Madan	An Ensemble Model for Co-Seismic Landslide Susceptibility Using GIS and Random Forest Method	ISPRS International Journal of Geo-Information	regional landslide analysis	regional susceptibility/hazard assessment	nep_1	Gorkha	2015-04-25 06:11:25UTC	Nepal
https://www.doi.org/10.1080/19475705.2018.1466731	576	2018	Farzam, Azarm; Nollet, Marie-José; Khaled, Amar	Susceptibility modelling of seismically induced effects (landslides and rock falls) integrated to rapid scoring procedures for bridges using GIS tools for the Lowlands of the Saint-Lawrence Valley	Geomatics, Natural Hazards and Risk	regional landslide analysis	regional susceptibility/hazard assessment	Not Applicable	Not Applicable	Not Applicable	Not Applicable
https://www.doi.org/10.1186/s40645-018-0169-6	577	2018	Saito, Hitoshi; Uchiyama, Shoichiro; Hayakawa, Yuichi S.; Obanawa, Hiroyuki	Landslides triggered by an earthquake and heavy rainfalls at Aso volcano, Japan, detected by UAS and SfM-MVS photogrammetry	Progress in Earth and Planetary Science	regional landslide analysis	regional mapping	jap_2	Kumamoto	2016-04-15 16:25:06UTC	Japan
https://www.doi.org/10.1038/sdata.2018.49	578	2018	Villani, Fabio; Civico, Riccardo; Pucci, Stefano; Pizzimenti, Luca; Nappi, Rosa; De Martini, Paolo Marco; the Open EMERGEO Working Group	A database of the coseismic effects following the 30 October 2016 Norcia earthquake in Central Italy	Scientific Data	other		Ita_6	Norcia	2016-10-30 06:40:18UTC	Italy|
https://www.doi.org/10.1016/j.geomorph.2018.01.028	579	2018	Martino, S.; Lenti, L.; Bourdeau, C.	Composite mechanism of the Büyükçekmece (Turkey) landslide as conditioning factor for earthquake-induced mobility	Geomorphology	single landslide analysis	single failure mapping|single failure geotechnical characterization|single failure geophysical characterization|single failure modelling	Not Applicable	Not Applicable	Not Applicable	Not Applicable
https://www.doi.org/10.1007/s13762-015-0752-y	580	2015	Gorum, T.; Carranza, E. J. M.	Control of style-of-faulting on spatial pattern of earthquake-triggered landslides	International Journal of Environmental Science and Technology	regional landslide analysis	regional landslide descriptive statistics	chin_1	Wenchuan-Sichuan	2008-05-12 06:28:01UTC	China
https://www.doi.org/10.1016/j.enggeo.2015.07.013	581	2015	Kuo, Chih-Yu; Chang, Kuo-Jen; Tsai, Pi-Wen; Wei, Shao-Kuan; Chen, Rou-Fei; Dong, Jia-Jyun; Yang, Che-Ming; Chan, Yu-Chang; Tai, Yih-Chin	Identification of co-seismic ground motion due to fracturing and impact of the Tsaoling landslide, Taiwan	Engineering Geology	single landslide analysis	single failure modelling	taiw_1	Chi Chi	1999-09-20 17:47:18UTC	Taiwan
https://www.doi.org/10.1007/s11069-015-1859-7	582	2015	An, Jiwen; Bai, Xianfu; Xu, Jinghai; Nie, Gaozhong; Wang, Xiuying	Prediction of highway blockage caused by earthquake-induced landslides for improving earthquake emergency response	Natural Hazards	regional landslide analysis	regional risk modelling	chin_1|chin_2	Wenchuan-Sichuan |Lushan	2008-05-12 06:28:01UTC|2013-04-20 00:02:47UTC	China|China
https://www.doi.org/10.1007/s40534-015-0084-0	583	2015	Guo, Haiqiang; Yao, Lingkan; Sun, Shaowei	Rapid assessment of seismic landslide zones	Journal of Modern Transportation	regional landslide analysis	regional susceptibility/hazard assessment	Not Applicable	Not Applicable	Not Applicable	Not Applicable
https://www.doi.org/10.1007/s10064-019-01509-y	584	2019	Pei, Xiangjun; Luo, Jing; Huang, Runqiu	Failure mechanisms of wind-induced post-seismic rockfall hazard	Bulletin of Engineering Geology and the Environment	Not Applicable	Not Applicable	chin_1	Wenchuan-Sichuan	2008-05-12 06:28:01UTC	China
https://www.doi.org/10.3390/geosciences10030090	585	2020	Ruggeri, Paolo; Fruzzetti, Viviene M. E.; Ferretti, Antonio; Scarpelli, Giuseppe	Seismic and Rainfall Induced Displacements of an Existing Landslide: Findings from the Continuous Monitoring	Geosciences	Not Applicable	rainfall-induced landslides|ground deformations and failure/liquefaction processes	ita_4|ita_5|ita_6	Amatrice|Castelsantangelo sul nera|Norcia	2016-08-24 01:36:32UTC|2016-10-26 19:18:08UTC|2016-10-30 06:40:18UTC	Italy|Italy|Italy
https://www.doi.org/10.1007/s11629-019-5681-7	586	2020	Li, Ning; Tang, Chuan; Yang, Tao; Chen, Ming	Analysing post-earthquake landslide susceptibility using multi-temporal landslide inventories — a case study in Miansi Town of China	Journal of Mountain Science	regional landslide analysis	regional susceptibility/hazard assessment	chin_1	Wenchuan-Sichuan	2008-05-12 06:28:01UTC	China
https://www.doi.org/10.3390/ijgi8020091	587	2019	De Donatis, Mauro; Pappafico, Giulio; Romeo, Roberto	A Field Data Acquisition Method and Tools for Hazard Evaluation of Earthquake-Induced Landslides with Open Source Mobile GIS	ISPRS International Journal of Geo-Information	other		Not Applicable	Not Applicable	Not Applicable	Not Applicable
https://www.doi.org/10.3390/ijgi8020094	588	2019	Meena, Sansar; Ghorbanzadeh, Omid; Blaschke, Thomas	A Comparative Study of Statistics-Based Landslide Susceptibility Models: A Case Study of the Region Affected by the Gorkha Earthquake in Nepal	ISPRS International Journal of Geo-Information	regional landslide analysis	regional mapping|regional susceptibility/hazard assessment	nep_1	Gorkha	2015-04-25 06:11:25UTC	Nepal
https://www.doi.org/10.5937/GeoPan1504184R	589	2015	Rizova, Radostina; Nachev, Georgi	Effect of seismic activity on the gravitational processes trough the example of the Butrointsi rockfall, SW Bulgaria	Geographica Pannonica	single landslide analysis	single landslide comparison	bul_1	Serbia-Bulgaria-Macedonia border region	2012-05-22 00:00:32UTC	Bulgaria
https://www.doi.org/10.1080/19475705.2014.898702	590	2016	Siyahghalati, Sajad; Saraf, Arun Kumar; Pradhan, Biswajeet; Jebur, Mustafa Neamah; tehrany, Mahyat Shafapour	Rule-based semi-automated approach for the detection of landslides induced by 18 September 2011 Sikkim, Himalaya, earthquake using IRS LISS3 satellite images	Geomatics, Natural Hazards and Risk	regional landslide analysis	regional mapping	ind_2	Sikkim	2011-09-18 12:40:51UTC	India
https://www.doi.org/10.1007/s11069-015-2071-5	591	2016	Vaz, T.; Zêzere, J. L.	Landslides and other geomorphologic and hydrologic effects induced by earthquakes in Portugal	Natural Hazards	regional landslide analysis	regional landslide comparison	Not Applicable	Not Applicable	Not Applicable	Not Applicable
https://www.doi.org/10.1016/j.geomorph.2016.02.013	592	2016	Guo, Changbao; Zhang, Yongshuang; Montgomery, David R.; Du, Yuben; Zhang, Guangze; Wang, Shifeng	How unusual is the long-runout of the earthquake-triggered giant Luanshibao landslide, Tibetan Plateau, China?	Geomorphology	Not Applicable	historical/Holocene landslides	Not Applicable	Not Applicable	Not Applicable	Not Applicable
https://www.doi.org/10.1007/s00603-016-0977-1	593	2016	Aydan, Ömer	Some Considerations on a Large Landslide at the Left Bank of the Aratozawa Dam Caused by the 2008 Iwate–Miyagi Intraplate Earthquake	Rock Mechanics and Rock Engineering	single landslide analysis	single failure geotechnical characterization|single failure modelling	jap_4	Iwate–Miyagi Nairiku (eastern Honshu, Japan)	2008-06-13 23:43:45UTC	Japan
https://www.doi.org/10.1007/s00603-015-0889-5	594	2016	Wolter, A.; Gischig, V.; Stead, D.; Clague, J. J.	Investigation of Geomorphic and Seismic Effects on the 1959 Madison Canyon, Montana, Landslide Using an Integrated Field, Engineering Geomorphology Mapping, and Numerical Modelling Approach	Rock Mechanics and Rock Engineering	single landslide analysis	single failure modelling	usa_12	The 1959 Hebgen Lake Earthquake, Montana	1959-08-18 06:37:13UTC	USA
https://www.doi.org/10.1002/2017JF004236	595	2017	Tanyaş, Hakan; van Westen, Cees J.; Allstadt, Kate E.; Anna Nowicki Jessee, M.; Görüm, Tolga; Jibson, Randall W.; Godt, Jonathan W.; Sato, Hiroshi P.; Schmitt, Robert G.; Marc, Odin; Hovius, Niels	Presentation and Analysis of a Worldwide Database of Earthquake-Induced Landslide Inventories: Earthquake-Induced Landslide Inventories	Journal of Geophysical Research: Earth Surface	other|regional landslide analysis	regional mapping	Not Applicable	Not Applicable	Not Applicable	Not Applicable
https://www.doi.org/10.1016/j.tecto.2016.10.031	596	2017	Gallen, Sean F.; Clark, Marin K.; Godt, Jonathan W.; Roback, Kevin; Niemi, Nathan A.	Application and evaluation of a rapid response earthquake-triggered landslide model to the 25 April 2015 Mw 7.8 Gorkha earthquake, Nepal	Tectonophysics	regional landslide analysis	regional mapping|regional susceptibility/hazard assessment	nep_1	Gorkha	2015-04-25 06:11:25UTC	Nepal
https://www.doi.org/10.1007/s10706-017-0236-6	597	2017	Bagheri, V.; Uromeihy, A.; Razifard, M.	Evaluation of MLP and RBF Methods for Hazard Zonation of Landslides Triggered by the Twin Ahar-Varzeghan Earthquakes	Geotechnical and Geological Engineering	regional landslide analysis	regional mapping|regional susceptibility/hazard assessment	ira_3|ira_4	Ahar-Varzeghan|Ahar-Varzeghan_2	2012-08-11 12:23:18UTC|2012-08-11 12:34:35UTC	Iran|Iran
https://www.doi.org/10.1007/s10346-016-0754-y	598	2017	Cui, Shenghua; Wang, Gonghui; Pei, Xiangjun; Huang, Runqiu; Kamai, Toshitaka	On the initiation and movement mechanisms of a catastrophic landslide triggered by the 2008 Wenchuan (Ms 8.0) earthquake in the epicenter area	Landslides	single landslide analysis	single failure mapping|single failure modelling|single failure geotechnical characterization	chin_1	Wenchuan-Sichuan	2008-05-12 06:28:01UTC	China
https://www.doi.org/10.1016/j.compgeo.2017.01.001	599	2017	Song, Yixiang; Huang, Da; Zeng, Bin	GPU-based parallel computation for discontinuous deformation analysis (DDA) method and its application to modelling earthquake-induced landslide	Computers and Geotechnics	single landslide analysis	single failure modelling	chin_1	Wenchuan-Sichuan	2008-05-12 06:28:01UTC	China
https://www.doi.org/10.1144/qjegh2016-085	600	2017	Dai, Zili; Wang, Fawu; Song, Kun; Iio, Akinori	A first look at a landslide triggered by the 2016 Kumamoto earthquake near the Aso Volcanological Laboratory	Quarterly Journal of Engineering Geology and Hydrogeology	single landslide analysis	single failure mapping	jap_2	Kumamoto	2016-04-15 16:25:06UTC	Japan
https://www.doi.org/10.1111/1755-6724.13124	601	2017	Du, Guoliang; Zhang, Yongshuang; Yang, Zhihua; Iqbal, Javed; Tong, Bin; Guo, Changbao; Yao, Xin; Wu, Ruian	Estimation of Seismic Landslide Hazard in the Eastern Himalayan Syntaxis Region of Tibetan Plateau	Acta Geologica Sinica - English Edition	regional landslide analysis	regional susceptibility/hazard assessment	Not Applicable	Not Applicable	Not Applicable	Not Applicable
https://www.doi.org/10.1016/j.enggeo.2017.01.007	602	2017	Li, Bin; Xing, Aiguo; Xu, Chong	Simulation of a long-runout rock avalanche triggered by the Lushan earthquake in the Tangjia Valley, Tianquan, Sichuan, China	Engineering Geology	single landslide analysis	single failure modelling	chin_2	Lushan	2013-04-20 00:02:47UTC	China
https://www.doi.org/10.1002/2016GL071687	603	2017	Huang, Mong‐Han; Fielding, Eric J.; Liang, Cunren; Milillo, Pietro; Bekaert, David; Dreger, Douglas; Salzer, Jacqueline	Coseismic deformation and triggered landslides of the 2016 <i> M <sub>w</sub> </i> 6.2 Amatrice earthquake in Italy	Geophysical Research Letters	regional landslide analysis	regional susceptibility/hazard assessment	ita_4	Amatrice	2016-08-24 01:36:32UTC	Italy
https://www.doi.org/10.4461/GFDQ2017.40.7	604	2017	Martino, S.; Bozzano, F.; Caporossi, P.; D'angiò, D.; Della Seta, M.; Esposito, C.; Fantini, A.; Fiorucci, M.; Giannini, L.M.; Iannucci, R.; Marmoni, G.M.; Mazzanti, P.; Missori, C.; Moretto, S.; Rivellino, S.; Romeo, R.W.; Sarandrea, P.; Schilirò L.; Troiani F.; Varone C.	Ground effects triggered by the 24th August 2016, Mw 6.0 Amatrice (Italy) earthquake: surveys and inventorying to update the CEDIT catalogue	Geografia Fisica e Dinamica Quaternaria	regional landslide analysis	regional mapping	ita_4	Amatrice	2016-08-24 01:36:32UTC	Italy
https://www.doi.org/10.1007/s11629-015-3688-2	605	2016	Regmi, Amar Deep; Dhital, Megh Raj; Zhang, Jian-qiang; Su, Li-jun; Chen, Xiao-qing	Landslide susceptibility assessment of the region affected by the 25 April 2015 Gorkha earthquake of Nepal	Journal of Mountain Science	regional landslide analysis	regional mapping|regional susceptibility/hazard assessment	nep_1	Gorkha	2015-04-25 06:11:25UTC	Nepal
https://www.doi.org/10.1093/gji/ggw131	606	2016	Martino, S.; Lenti, L.; Delgado, J.; Garrido, J.; Lopez-Casado, C.	Application of a characteristic periods-based (CPB) approach to estimate earthquake-induced displacements of landslides through dynamic numerical modelling	Geophysical Journal International	single landslide analysis	single failure mapping|single failure geophysical characterization|single failure modelling	Not Applicable	Not Applicable	Not Applicable	Not Applicable
https://www.doi.org/10.1007/s00603-015-0821-z	607	2016	Gischig, Valentin; Preisig, Giona; Eberhardt, Erik	Numerical Investigation of Seismically Induced Rock Mass Fatigue as a Mechanism Contributing to the Progressive Failure of Deep-Seated Landslides	Rock Mechanics and Rock Engineering	single landslide analysis	single failure modelling	Not Applicable	Not Applicable	Not Applicable	Not Applicable
https://www.doi.org/10.1007/s10346-016-0748-9	608	2016	Dang, Khang; Sassa, Kyoji; Fukuoka, Hiroshi; Sakai, Naoki; Sato, Yuji; Takara, Kaoru; Quang, Lam Huu; Loi, Doan Huy; Van Tien, Pham; Ha, Nguyen Duc	Mechanism of two rapid and long-runout landslides in the 16 April 2016 Kumamoto earthquake using a ring-shear apparatus and computer simulation (LS-RAPID)	Landslides	single landslide analysis	single failure geotechnical characterization|single failure modelling	jap_2	Kumamoto	2016-04-15 16:25:06UTC	Japan
https://www.doi.org/10.1080/10106049.2016.1232316	609	2017	Tian, Yingying; Xu, Chong; Chen, Jian; Hong, Haoyuan	Spatial distribution and susceptibility analyses of pre-earthquake and coseismic landslides related to the Ms 6.5 earthquake of 2014 in Ludian, Yunan, China	Geocarto International	regional landslide analysis	regional landslide descriptive statistics|regional susceptibility/hazard assessment	chin_5	Wenping (Ludian county)	2014-08-03 08:30:13UTC	China
https://www.doi.org/10.1002/2016JB013418	610	2016	O'Brien, Grant A.; Cox, Simon C.; Townend, John	Spatially and temporally systematic hydrologic changes within large geoengineered landslides, Cromwell Gorge, New Zealand, induced by multiple regional earthquakes: SYSTEMATIC HYDROLOGIC CHANGES	Journal of Geophysical Research: Solid Earth	Not Applicable	Not Applicable	Not Applicable	Not Applicable	Not Applicable	Not Applicable
https://www.doi.org/10.1002/2016JF003883	611	2016	Kienholz, C.; Hock, R.; Truffer, M.; Arendt, A. A.; Arko, S.	Geodetic mass balance of surge‐type Black Rapids Glacier, Alaska, 1980–2001–2010, including role of rockslide deposition and earthquake displacement	Journal of Geophysical Research: Earth Surface	Not Applicable	Not Applicable	usa_5	Denali fault	2002-11-03 22:12:41UTC	USA
https://www.doi.org/10.1016/j.geomorph.2016.07.032	612	2016	Vega, Johnny Alexander; Hidalgo, Cesar Augusto	Quantitative risk assessment of landslides triggered by earthquakes and rainfall based on direct costs of urban buildings	Geomorphology	regional landslide analysis	regional susceptibility/hazard assessment|regional risk modelling	Not Applicable	Not Applicable	Not Applicable	Not Applicable
https://www.doi.org/10.1016/j.soildyn.2015.09.010	613	2015	Stamatopoulos, Constantine A.	Limit sliding-block seismic displacement for landslide triggering along slip surfaces consisting of saturated sand	Soil Dynamics and Earthquake Engineering	single landslide analysis	single failure modelling|single landslide comparison	chin_1|jap_1|jap_3	Wenchuan-Sichuan|Niigata-Chuetsu|Hyogo-ken Nanbu (Kobe)	2008-05-12 06:28:01UTC|2004-10-23 08:56:00UTC|1995-01-16 20:46:52UTC	China|Japan|Japan
https://www.doi.org/10.1016/j.geomorph.2015.01.037	614	2015	Havenith, H.B.; Strom, A.; Torgoev, I.; Torgoev, A.; Lamair, L.; Ischuk, A.; Abdrakhmatov, K.	Tien Shan Geohazards Database: Earthquakes and landslides	Geomorphology	other|regional landslide analysis	regional mapping|regional landslide descriptive statistics	Not Applicable	Not Applicable	Not Applicable	Not Applicable
https://www.doi.org/10.1016/j.gsf.2014.03.004	615	2015	Xu, Chong	Preparation of earthquake-triggered landslide inventory maps using remote sensing and GIS technologies: Principles and case studies	Geoscience Frontiers	other|regional landslide analysis	regional mapping|regional landslide comparison	chin_1|chin_6|hai_1|chil_1	Wenchuan-Sichuan|Yushu (China)(southern Qinghai, China)|Haiti region|Aysén Fjord (Patagonia)	2008-05-12 06:28:01UTC|2010-04-13 23:49:38UTC|2010-01-12 21:53:10UTC|2007-04-21 17:53:46UTC	China|China|Haiti|Chile
https://www.doi.org/10.4408/IJEGE.2017-02.O-05	616	2017	Domej, Gisela; Bourdeau, Celine; Lenti, Luca	Mean landslide geometries inferred from a global database of earthquake- and non-earthquake-triggered landslides	Italian Journal of Engineering Geology and Environment	regional landslide analysis	regional landslide descriptive statistics|regional landslide comparison	Not Applicable	Not Applicable	Not Applicable	Not Applicable
https://www.doi.org/10.1007/s12665-014-3251-4	617	2014	Changwei, Yang; Xinmin, Liu; Jianjing, Zhang; Zhiwei, Chen; Cong, Shi; Hongbo, Gao	Analysis on mechanism of landslides under ground shaking: a typical landslide in the Wenchuan earthquake	Environmental Earth Sciences	single landslide analysis	single failure geotechnical characterization|single failure modelling	chin_1	Wenchuan-Sichuan	2008-05-12 06:28:01UTC	China
https://www.doi.org/10.1016/j.enggeo.2014.03.016	618	2014	Peng, M.; Zhang, L.M.; Chang, D.S.; Shi, Z.M.	Engineering risk mitigation measures for the landslide dams induced by the 2008 Wenchuan earthquake	Engineering Geology	Not Applicable	water environment landslides	chin_1	Wenchuan-Sichuan	2008-05-12 06:28:01UTC	China
https://www.doi.org/10.1016/j.soildyn.2014.05.009	619	2014	Chousianitis, Konstantinos; Del Gaudio, Vincenzo; Kalogeras, Ioannis; Ganas, Athanassios	Predictive model of Arias intensity and Newmark displacement for regional scale evaluation of earthquake-induced landslide hazard in Greece	Soil Dynamics and Earthquake Engineering	regional landslide analysis	regional susceptibility/hazard assessment	Not Applicable	Not Applicable	Not Applicable	Not Applicable
https://www.doi.org/10.1007/s12665-014-3151-7	620	2014	Rodríguez-Peces, M. J.; García-Mayordomo, J.; Azañón, J. M.; Jabaloy, A.	GIS application for regional assessment of seismically induced slope failures in the Sierra Nevada Range, South Spain, along the Padul Fault	Environmental Earth Sciences	regional landslide analysis	regional mapping|regional susceptibility/hazard assessment	Not Applicable	Not Applicable	Not Applicable	Not Applicable
https://www.doi.org/10.1109/LGRS.2014.2306820	621	2014	Ning Li; Wang, Robert; Yunkai Deng; Yabo Liu; Chunle Wang; Balz, Timo; Bochen Li	Polarimetric Response of Landslides at X-Band Following the Wenchuan Earthquake	IEEE Geoscience and Remote Sensing Letters	regional landslide analysis	regional mapping	chin_1	Wenchuan-Sichuan	2008-05-12 06:28:01UTC	China
https://www.doi.org/10.1016/j.rse.2014.06.002	622	2014	Chen, Qiang; Cheng, Haiqin; Yang, Yinghui; Liu, Guoxiang; Liu, Liyao	Quantification of mass wasting volume associated with the giant landslide Daguangbao induced by the 2008 Wenchuan earthquake from persistent scatterer InSAR	Remote Sensing of Environment	single landslide analysis	single failure mapping	chin_1	Wenchuan-Sichuan	2008-05-12 06:28:01UTC	China
https://www.doi.org/10.1117/1.JRS.8.083595	623	2014	Li, Ning; Wang, Robert; Deng, Yunkai; Liu, Yabo; Li, Bochen; Wang, Chunle; Balz, Timo	Unsupervised polarimetric synthetic aperture radar classification of large-scale landslides caused by Wenchuan earthquake in hue-saturation-intensity color space	Journal of Applied Remote Sensing	regional landslide analysis	regional mapping	chin_1	Wenchuan-Sichuan	2008-05-12 06:28:01UTC	China
https://www.doi.org/10.1016/j.enggeo.2014.03.012	624	2014	Zhang, S.; Zhang, L.M.; Glade, T.	Characteristics of earthquake- and rain-induced landslides near the epicenter of Wenchuan earthquake	Engineering Geology	regional landslide analysis	regional mapping	chin_1	Wenchuan-Sichuan	2008-05-12 06:28:01UTC	China
https://www.doi.org/10.1007/s11069-014-1044-4	625	2014	Budimir, M. E. A.; Atkinson, P. M.; Lewis, H. G.	Earthquake-and-landslide events are associated with more fatalities than earthquakes alone	Natural Hazards	regional landslide analysis	regional risk modelling	Not Applicable	Not Applicable	Not Applicable	Not Applicable
https://www.doi.org/10.1016/j.enggeo.2014.02.002	626	2014	Nowicki, M. Anna; Wald, David J.; Hamburger, Michael W.; Hearne, Michael; Thompson, Eric M.	Development of a globally applicable model for near real-time prediction of seismically induced landslides	Engineering Geology	regional landslide analysis	regional susceptibility/hazard assessment	Not Applicable	Not Applicable	Not Applicable	Not Applicable
https://www.doi.org/10.1007/s11629-013-2664-y	627	2014	Chen, Kun-Ting; Kuo, Yu-Shu; Shieh, Chjeng-Lun	Rapid geometry analysis for earthquake-induced and rainfall-induced landslide dams in Taiwan	Journal of Mountain Science	regional landslide analysis	regional mapping|regional susceptibility/hazard assessment	Not Applicable	Not Applicable	Not Applicable	Not Applicable
https://www.doi.org/10.1002/esp.3510	628	2014	Huang, Alice Y.-L.; Montgomery, David R.	Topographic locations and size of earthquake- and typhoon-generated landslides, Tachia River, Taiwan	Earth Surface Processes and Landforms	regional landslide analysis	regional landslide descriptive statistics	taiw_1	Chi Chi	1999-09-20 17:47:18UTC	Taiwan
https://www.doi.org/10.5194/nhess-14-799-2014	629	2014	Martino, S.; Prestininzi, A.; Romeo, R. W.	Earthquake-induced ground failures in Italy from a reviewed database	Natural Hazards and Earth System Sciences	other|regional landslide analysis	regional landslide comparison	Not Applicable	Not Applicable	Not Applicable	Not Applicable
https://www.doi.org/10.1007/s11069-013-0846-0	630	2014	Zhao, Weihua; Huang, Runqiu; Ju, Nengpan; Zhao, Jianjun	Assessment model for earthquake-triggered landslides based on quantification theory I: case study of Jushui River basin in Sichuan, China	Natural Hazards	regional landslide analysis	regional susceptibility/hazard assessment	chin_1	Wenchuan-Sichuan	2008-05-12 06:28:01UTC	China
https://www.doi.org/10.1007/s12665-013-2475-z	631	2014	Bai, S. B.; Wang, J.; Thiebes, B.; Cheng, C.; Chang, Z. Y.	Susceptibility assessments of the Wenchuan earthquake-triggered landslides in Longnan using logistic regression	Environmental Earth Sciences	regional landslide analysis	regional susceptibility/hazard assessment	chin_1	Wenchuan-Sichuan	2008-05-12 06:28:01UTC	China
https://www.doi.org/10.1007/s10518-013-9477-9	632	2013	Bozzano, F.; Esposito, C.; Martini, G.; Martino, S.; Prestininzi, A.; Rinaldis, D.; Romeo, R. W.; Scarascia Mugnozza, G.	Earthquake-reactivated landslide scenarios in Southern Italy based on spectral-matching input analysis	Bulletin of Earthquake Engineering	regional landslide analysis	regional susceptibility/hazard assessment	Not Applicable	Not Applicable	Not Applicable	Not Applicable
https://www.doi.org/10.1016/j.jvolgeores.2017.01.007	633	2017	Hibert, Clément; Mangeney, Anne; Grandjean, Gilles; Peltier, Aline; DiMuro, Andrea; Shapiro, Nikolai M.; Ferrazzini, Valérie; Boissier, Patrice; Durand, Virginie; Kowalski, Philippe	Spatio-temporal evolution of rockfall activity from 2007 to 2011 at the Piton de la Fournaise volcano inferred from seismic data	Journal of Volcanology and Geothermal Research	Not Applicable	Not Applicable	Not Applicable	Not Applicable	Not Applicable	Not Applicable
https://www.doi.org/10.1007/s11430-013-4582-9	634	2013	Zhu, ShouBiao; Shi, YaoLin; Lu, Ming; Xie, FuRen	Dynamic mechanisms of earthquake-triggered landslides	Science China Earth Sciences	single landslide analysis	single failure modelling	chin_1	Wenchuan-Sichuan	2008-05-12 06:28:01UTC	China
https://www.doi.org/10.1007/s11629-013-2432-z	635	2013	Bai, Shi-biao; Cheng, Chen; Wang, Jian; Thiebes, Benni; Zhang, Zhi-gang	Regional scale rainfall- and earthquake-triggered landslide susceptibility assessment in Wudu County, China	Journal of Mountain Science	regional landslide analysis	regional susceptibility/hazard assessment	chin_1	Wenchuan-Sichuan	2008-05-12 06:28:01UTC	China
https://www.doi.org/10.1007/s11069-013-0661-7	636	2013	Xu, Chong; Xu, Xiwei; Dai, Fuchu; Wu, Zhide; He, Honglin; Shi, Feng; Wu, Xiyan; Xu, Suning	Application of an incomplete landslide inventory, logistic regression model and its validation for landslide susceptibility mapping related to the May 12, 2008 Wenchuan earthquake of China	Natural Hazards	regional landslide analysis	regional susceptibility/hazard assessment	chin_1	Wenchuan-Sichuan	2008-05-12 06:28:01UTC	China
https://www.doi.org/10.1007/s10346-012-0342-8	637	2013	Das, H. O.; Sonmez, H.; Gokceoglu, C.; Nefeslioglu, H. A.	Influence of seismic acceleration on landslide susceptibility maps: a case study from NE Turkey (the Kelkit Valley)	Landslides	regional landslide analysis	regional susceptibility/hazard assessment	Not Applicable	Not Applicable	Not Applicable	Not Applicable
https://www.doi.org/10.1007/s12665-012-2044-x	638	2013	Huang, Hung-Pin; Yang, Kai-Chun; Lin, Bo-Wei	Statistical evaluation of the effect of earthquake with other related factors on landslide susceptibility: using the watershed area of Shihmen reservoir in Taiwan as a case study	Environmental Earth Sciences	regional landslide analysis	regional susceptibility/hazard assessment	Not Applicable	Not Applicable	Not Applicable	Not Applicable
https://www.doi.org/10.1785/0120110233	639	2013	Yuan, R.-M.; Deng, Q.-H.; Cunningham, D.; Xu, C.; Xu, X.-W.; Chang, C.-P.	Density Distribution of Landslides Triggered by the 2008 Wenchuan Earthquake and their Relationships to Peak Ground Acceleration	Bulletin of the Seismological Society of America	regional landslide analysis	regional landslide descriptive statistics|regional susceptibility/hazard assessment	chin_1	Wenchuan-Sichuan	2008-05-12 06:28:01UTC	China
https://www.doi.org/10.1002/jgrb.50215	640	2013	Tatard, L.; Grasso, J. R.	Controls of earthquake faulting style on near field landslide triggering: The role of coseismic slip: ROLE OF COSEISMIC SLIP ON LANDSLIDING	Journal of Geophysical Research: Solid Earth	regional landslide analysis	regional landslide comparison	Not Applicable	Not Applicable	Not Applicable	Not Applicable
https://www.doi.org/10.1016/j.soildyn.2013.01.022	641	2013	Kazmi, Zaheer Abbas; Konagai, Kazuo; Sekiguchi, Haruko; Fujita, Tomohiro	Extracting earthquake induced Lagrangian ground displacements and their implication for source inversion analysis	Soil Dynamics and Earthquake Engineering	Not Applicable	ground deformations and failure/liquefaction processes	jap_1	Niigata-Chuetsu	2004-10-23 08:56:00UTC	Japan
https://www.doi.org/10.1016/j.enggeo.2013.01.005	642	2013	Liu, Shou-Heng; Lin, Ching-Weei; Tseng, Chih-Ming	A statistical model for the impact of the 1999 Chi-Chi earthquake on the subsequent rainfall-induced landslides	Engineering Geology	regional landslide analysis	regional susceptibility/hazard assessment	taiw_1	Chi Chi	1999-09-20 17:47:18UTC	Taiwan
https://www.doi.org/10.1016/j.enggeo.2013.01.004	643	2013	Wang, Gonghui; Huang, Runqiu; Kamai, Toshitaka; Zhang, Fanyu	The internal structure of a rockslide dam induced by the 2008 Wenchuan (Mw7.9) earthquake, China	Engineering Geology	single landslide analysis	single failure mapping|single failure geophysical characterization	chin_1	Wenchuan-Sichuan	2008-05-12 06:28:01UTC	China
https://www.doi.org/10.1016/j.epsl.2012.12.018	644	2013	Meunier, Patrick; Uchida, Taro; Hovius, Niels	Landslide patterns reveal the sources of large earthquakes	Earth and Planetary Science Letters	regional landslide analysis	regional mapping|regional landslide descriptive statistics	jap_1|jap_4	Niigata-Chuetsu|Iwate–Miyagi Nairiku (eastern Honshu, Japan)	2004-10-23 08:56:00UTC|2008-06-13 23:43:45UTC	Japan|Japan
https://www.doi.org/10.1007/s12665-010-0853-3	645	2012	Ozcep, Ferhat; Erol, Engin; Saraçoğlu, Fatih; Haliloğlu, Mustafa	Seismic landslide analysis: Gurpinar (Istanbul) as a case history	Environmental Earth Sciences	single landslide analysis	single failure geotechnical characterization|single failure modelling|single failure geophysical characterization	Not Applicable	Not Applicable	Not Applicable	Not Applicable
https://www.doi.org/10.1007/s10346-011-0285-5	646	2012	Huang, Yu; Zhang, Weijie; Xu, Qiang; Xie, Pan; Hao, Liang	Run-out analysis of flow-like landslides triggered by the Ms 8.0 2008 Wenchuan earthquake using smoothed particle hydrodynamics	Landslides	single landslide analysis	single failure modelling	chin_1	Wenchuan-Sichuan	2008-05-12 06:28:01UTC	China
https://www.doi.org/10.1016/j.geomorph.2011.12.040	647	2012	Xu, Chong; Dai, Fuchu; Xu, Xiwei; Lee, Yuan Hsi	GIS-based support vector machine modeling of earthquake-triggered landslide susceptibility in the Jianjiang River watershed, China	Geomorphology	regional landslide analysis	regional susceptibility/hazard assessment	chin_1	Wenchuan-Sichuan	2008-05-12 06:28:01UTC	China
https://www.doi.org/10.1007/s10346-011-0280-x	648	2012	Konagai, Kazuo; Sattar, Ahsan	Partial breaching of Hattian Bala Landslide Dam formed in the 8th October 2005 Kashmir Earthquake, Pakistan	Landslides	single landslide analysis	single failure mapping|single failure modelling	pak_1	Kashmir	2005-10-08 03:50:40UTC	Pakistan
https://www.doi.org/10.5194/nhess-12-1381-2012	649	2012	Zhang, S.; Zhang, L. M.; Peng, M.; Zhang, L. L.; Zhao, H. F.; Chen, H. X.	Assessment of risks of loose landslide deposits formed by the 2008 Wenchuan earthquake	Natural Hazards and Earth System Sciences	Not Applicable	rainfall-induced landslides	chin_1	Wenchuan-Sichuan	2008-05-12 06:28:01UTC	China
https://www.doi.org/10.1007/s10346-017-0813-z	650	2017	Zhang, Zelin; Wang, Tao; Wu, Shuren; Tang, Huiming; Liang, Changyu	Investigation of dormant landslides in earthquake conditions using a physical model	Landslides	single landslide analysis	single failure geotechnical characterization|single failure modelling|single failure geophysical characterization	chin_3	Minxian-Zhangxian	2013-07-21 23:45:56UTC	China
https://www.doi.org/10.1007/s10346-017-0797-8	651	2017	Rosser, Brenda Jane; Carey, Jonathan M.	Comparison of landslide inventories from the 1994 Mw 6.8 Arthurs Pass and 2015 Mw 6.0 Wilberforce earthquakes, Canterbury, New Zealand	Landslides	regional landslide analysis	regional landslide comparison|regional landslide descriptive statistics	nze_3|nze_4	Arthurs Pass|Wilberforce	1994-06-18 03:25:15UTC|2015-01-05 17:48:42UTC	New Zealand|New Zealand
https://www.doi.org/10.1007/s10346-016-0792-5	652	2017	Wu, Guo; Cunningham, Dickson; Yuan, Ren-mao; Zhou, Qing; Zeng, Xinfu; Yang, Xiao-ping	Mass-wasting effects induced by the 2015 Gorkha (Nepal) Mw 7.8 earthquake within a large paleo-landslide site adjacent to the Tatopani Border Station, Nepal: implications for future development along the critical Bhote Koshi River valley transport corridor between Nepal and China	Landslides	regional landslide analysis|single landslide analysis	regional mapping|single failure mapping|single failure modelling	nep_1|nep_2	Gorkha|Gorkha_2	2015-04-25 06:11:25UTC|2015-05-12 07:05:19UTC	Nepal|Nepal
https://www.doi.org/10.1016/j.enggeo.2017.03.016	653	2017	Pei, Xiangjun; Zhang, Xiaochao; Guo, Bin; Wang, Gonghui; Zhang, Fanyu	Experimental case study of seismically induced loess liquefaction and landslide	Engineering Geology	single landslide analysis	single failure mapping|single failure geotechnical characterization	chin_4	Haiyuan	1920-12-16 12:05:55UTC	China
https://www.doi.org/10.1139/cgj-2017-0076	654	2017	Dadfar, Behrang; El Naggar, M. Hesham; Nastev, Miroslav	Quantifying exposure of linear infrastructures to earthquake-triggered transverse landslides in permafrost thawing slopes	Canadian Geotechnical Journal	regional landslide analysis	regional susceptibility/hazard assessment|regional risk modelling	Not Applicable	Not Applicable	Not Applicable	Not Applicable
https://www.doi.org/10.1007/s11629-017-4363-6	655	2017	Zhang, Yong-shuang; Yang, Zhi-hua; Guo, Chang-bao; Wang, Tao; Wang, Dong-hui; Du, Guo-liang	Predicting landslide scenes under potential earthquake scenarios in the Xianshuihe fault zone, Southwest China	Journal of Mountain Science	regional landslide analysis	regional susceptibility/hazard assessment	chin_13	Luhuo	1973-02-06 10:37:10UTC	China
https://www.doi.org/10.1007/s12517-017-3026-9	656	2017	Tanoli, Javed Iqbal; Ningsheng, Chen; Regmi, Amar Deep; Jun, Li	Spatial distribution analysis and susceptibility mapping of landslides triggered before and after Mw7.8 Gorkha earthquake along Upper Bhote Koshi, Nepal	Arabian Journal of Geosciences	regional landslide analysis	regional mapping|regional susceptibility/hazard assessment	nep_1|nep_2	Gorkha|Gorkha_2	2015-04-25 06:11:25UTC|2015-05-12 07:05:19UTC	Nepal|Nepal
https://www.doi.org/10.1002/esp.4112	657	2017	Huang, Jr-Chuan; Milliman, John D.; Lee, Tsung-Yu; Chen, Yi-Chin; Lee, Jiin-Fa; Liu, Cheng-Chien; Lin, Jiun-Chuan; Kao, Shuh-Ji	Terrain attributes of earthquake- and rainstorm-induced landslides in orogenic mountain Belt, Taiwan: Terrain attributes of earthquake- and rainstorm-induced landslides	Earth Surface Processes and Landforms	regional landslide analysis	regional landslide descriptive statistics	taiw_1	Chi Chi	1999-09-20 17:47:18UTC	Taiwan
https://www.doi.org/10.3390/geosciences8060219	658	2018	Hadi, Arif; Brotopuspito, Kirbani; Pramumijoyo, Subagyo; Hardiyatmo, Hary	Regional Landslide Potential Mapping in Earthquake-Prone Areas of Kepahiang Regency, Bengkulu Province, Indonesia	Geosciences	regional landslide analysis	regional susceptibility/hazard assessment	Not Applicable	Not Applicable	Not Applicable	Not Applicable
https://www.doi.org/10.1007/s00531-017-1506-5	659	2018	Valente, Ettore; Ascione, A.; Ciotoli, G.; Cozzolino, M.; Porfido, S.; Sciarra, A.	Do moderate magnitude earthquakes generate seismically induced ground effects? The case study of the M w = 5.16, 29th December 2013 Matese earthquake (southern Apennines, Italy)	International Journal of Earth Sciences	regional landslide analysis	regional mapping	ita_19	Matese	2013-12-29 17:08:43UTC	Italy
https://www.doi.org/10.1007/s11629-017-4527-4	660	2018	Huang, Chao; Li, Yu-sheng; Yi, Shu-jian; Liu, Kai; Wu, Chun-hao	Characteristics and failure mechanism of an ancient earthquake-induced landslide with an extremely wide distribution area	Journal of Mountain Science	Not Applicable	historical/Holocene landslides	Not Applicable	Not Applicable	Not Applicable	Not Applicable
https://www.doi.org/10.4408/IJEGE.2018-02.O-02	661	2018	Caprari, Patrizia; Martino, Salvatore; Fantini, Andrea; Fiorucci, Matteo; Priore, Tiziana	Upgrade of the CEDIT database of earthquake-induced ground effects in Italy	Italian Journal of Engineering Geology and Environment	other		Not Applicable	Not Applicable	Not Applicable	Not Applicable
https://www.doi.org/10.1007/s10064-016-0938-7	662	2017	Lenti, L.; Martino, S.; Musolino, G.	Considering seismic coefficient distributions within slopes to calculate landslide reactivation probability	Bulletin of Engineering Geology and the Environment	single landslide analysis	single failure modelling	Not Applicable	Not Applicable	Not Applicable	Not Applicable
https://www.doi.org/10.1007/s10346-017-0872-1	663	2017	Chen, Chi-Wen; Chen, Hongey; Wei, Lun-Wei; Lin, Guan-Wei; Iida, Tomoyuki; Yamada, Ryuji	Evaluating the susceptibility of landslide landforms in Japan using slope stability analysis: a case study of the 2016 Kumamoto earthquake	Landslides	regional landslide analysis	regional susceptibility/hazard assessment	jap_2	Kumamoto	2016-04-15 16:25:06UTC	Japan
https://www.doi.org/10.1007/s00603-017-1245-8	664	2017	Fan, Gang; Zhang, Li-Min; Zhang, Jian-Jing; Ouyang, Fang	Energy-Based Analysis of Mechanisms of Earthquake-Induced Landslide Using Hilbert–Huang Transform and Marginal Spectrum	Rock Mechanics and Rock Engineering	single landslide analysis	single failure modelling	chin_1	Wenchuan-Sichuan	2008-05-12 06:28:01UTC	China
https://www.doi.org/10.1016/j.enggeo.2011.03.019	665	2011	Kokusho, Takaji; Ishizawa, Tomohiro; Koizumi, Keisuke	Energy approach to seismically induced slope failure and its application to case histories	Engineering Geology	regional landslide analysis|single landslide analysis	single failure modelling|regional susceptibility/hazard assessment|regional landslide comparison	jap_1|jap_4	Niigata-Chuetsu|Iwate–Miyagi Nairiku (eastern Honshu, Japan)	2004-10-23 08:56:00UTC|2008-06-13 23:43:45UTC	Japan|Japan
https://www.doi.org/10.1007/s11069-011-9790-z	666	2012	Rapolla, A.; Di Nocera, S.; Matano, F.; Paoletti, V.; Tarallo, D.	Susceptibility regional zonation of earthquake-induced landslides in Campania, Southern Italy	Natural Hazards	regional landslide analysis	regional susceptibility/hazard assessment	Not Applicable	Not Applicable	Not Applicable	Not Applicable
https://www.doi.org/10.1016/j.geomorph.2011.12.026	667	2012	Schulz, William H.; Galloway, Sarah L.; Higgins, Jerry D.	Evidence for earthquake triggering of large landslides in coastal Oregon, USA	Geomorphology	single landslide analysis	single failure modelling	Not Applicable	Not Applicable	Not Applicable	Not Applicable
https://www.doi.org/10.1016/j.soildyn.2012.09.005	668	2013	Rajabi, Ali. M.; Khamehchiyan, M.; Mahdavifar, M.R.; Del Gaudio, V.; Capolongo, D.	A time probabilistic approach to seismic landslide hazard estimates in Iran	Soil Dynamics and Earthquake Engineering	regional landslide analysis	regional susceptibility/hazard assessment	ira_2	Rudbar–Manjil	1990-06-20 21:00:09UTC	Iran
https://www.doi.org/10.1016/j.enggeo.2014.08.019	669	2014	Kokusho, Takaji; Koyanagi, Tomoyuki; Yamada, Takuma	Energy approach to seismically induced slope failure and its application to case histories — Supplement	Engineering Geology	other		jap_1|jap_4	Niigata-Chuetsu|Iwate–Miyagi Nairiku (eastern Honshu, Japan)	2004-10-23 08:56:00UTC|2008-06-13 23:43:45UTC	Japan|Japan
https://www.doi.org/10.1631/jzus.A1400039	670	2015	Ran, Qi-hua; Qian, Qun; Li, Wei; Fu, Xu-dong; Yu, Xiao; Xu, Yue-ping	Impact of earthquake-induced-landslides on hydrologic response of a steep mountainous catchment: a case study of the Wenchuan earthquake zone	Journal of Zhejiang University-SCIENCE A	Not Applicable	rainfall-induced landslides	chin_1	Wenchuan-Sichuan	2008-05-12 06:28:01UTC	China
https://www.doi.org/10.1007/s12517-014-1435-6	671	2015	Yang, Zon-Yee; Pourghasemi, Hamid Reza; Pradhan, Biswajeet; Chen, Tien-Cheng; Lee, Yen-Hung	An index to describe the earthquake effect on subsequent landslides in Central Taiwan	Arabian Journal of Geosciences	regional landslide analysis	regional landslide descriptive statistics	taiw_1	Chi Chi	1999-09-20 17:47:18UTC	Taiwan
https://www.doi.org/10.1007/s10346-015-0554-9	672	2016	Yin, Yueping; Cheng, Yuliang; Liang, Jingtao; Wang, Wenpei	Heavy-rainfall-induced catastrophic rockslide-debris flow at Sanxicun, Dujiangyan, after the Wenchuan Ms 8.0 earthquake	Landslides	Not Applicable	Not Applicable	chin_1	Wenchuan-Sichuan	2008-05-12 06:28:01UTC	China
https://www.doi.org/10.1016/j.geomorph.2014.11.025	673	2015	Shang, Y.J.; Liu, J.Q.; Liu, D.A.; Zhang, L.Q.; Xia, Y.Q.; Lei, T.Z.	Observation of explosion pits and test results of ejecta above a rock avalanche triggered by the Wenchuan earthquake, China	Geomorphology	Not Applicable	Not Applicable	chin_1	Wenchuan-Sichuan	2008-05-12 06:28:01UTC	China
https://www.doi.org/10.1785/0120170033	674	2017	Hartzell, Stephen; Leeds, Alena L.; Jibson, Randall W.	Seismic Response of Soft Deposits due to Landslide: The Mission Peak, California, Landslide	Bulletin of the Seismological Society of America	Not Applicable	Not Applicable	Not Applicable	Not Applicable	Not Applicable	Not Applicable
https://www.doi.org/10.3390/rs9080864	675	2017	Ren, Zhikun; Zhang, Zhuqi; Yin, Jinhui	Erosion Associated with Seismically-Induced Landslides in the Middle Longmen Shan Region, Eastern Tibetan Plateau, China	Remote Sensing	regional landslide analysis	regional mapping|regional landslide descriptive statistics	chin_1	Wenchuan-Sichuan	2008-05-12 06:28:01UTC	China
https://www.doi.org/10.1007/s10346-016-0793-4	676	2017	Gao, Yang; Yin, Yueping; Li, Bin; Feng, Zhen; Wang, Wenpei; Zhang, Nan; Xing, Aiguo	Characteristics and numerical runout modeling of the heavy rainfall-induced catastrophic landslide–debris flow at Sanxicun, Dujiangyan, China, following the Wenchuan Ms 8.0 earthquake	Landslides	Not Applicable	Not Applicable	chin_1	Wenchuan-Sichuan	2008-05-12 06:28:01UTC	China
https://www.doi.org/10.1111/1755-6724.12655	677	2016	Jiawen, Zhou; Peng, Cui; Xingguo, Yang	Effects of Material Composition and Water Content on the Mechanical Properties of Landslide Deposits Triggered by the Wenchuan Earthquake	Acta Geologica Sinica - English Edition	single landslide analysis	single failure geotechnical characterization	chin_1	Wenchuan-Sichuan	2008-05-12 06:28:01UTC	China
https://www.doi.org/10.1016/j.enggeo.2017.01.005	678	2017	Bourdeau, C.; Lenti, L.; Martino, S.; Oguz, O.; Yalcinkaya, E.; Bigarrè, P.; Coccia, S.	Comprehensive analysis of the local seismic response in the complex Büyükçekmece landslide area (Turkey) by engineering-geological and numerical modelling	Engineering Geology	single landslide analysis	single failure modelling	Not Applicable	Not Applicable	Not Applicable	Not Applicable
https://www.doi.org/10.1093/gji/ggv063	679	2015	Lenti, L.; Martino, S.; Paciello, A.; Prestininzi, A.; Rivellino, S.	Recorded displacements in a landslide slope due to regional and teleseismic earthquakes	Geophysical Journal International	Not Applicable	Not Applicable	Not Applicable	Not Applicable	Not Applicable	Not Applicable
https://www.doi.org/10.1016/j.enggeo.2017.04.001	680	2017	Yang, Zongji; Qiao, Jianping; Uchimura, Taro; Wang, Lin; Lei, Xiaoqin; Huang, Dong	Unsaturated hydro-mechanical behaviour of rainfall-induced mass remobilization in post-earthquake landslides	Engineering Geology	single landslide analysis	single failure modelling	chin_1	Wenchuan-Sichuan	2008-05-12 06:28:01UTC	China
https://www.doi.org/10.5194/nhess-16-2641-2016	681	2016	Tang, Chenxiao; Van Westen, Cees J.; Tanyas, Hakan; Jetten, Victor G.	Analysing post-earthquake landslide activity using multi-temporal landslide inventories near the epicentral area of the 2008 Wenchuan earthquake	Natural Hazards and Earth System Sciences	regional landslide analysis	regional mapping	chin_1	Wenchuan-Sichuan	2008-05-12 06:28:01UTC	China
https://www.doi.org/10.1155/2019/9782515	682	2019	Cui, Yulong; Liu, Aijuan; Xu, Chong; Zheng, Jun	A Modified Newmark Method for Calculating Permanent Displacement of Seismic Slope considering Dynamic Critical Acceleration	Advances in Civil Engineering	Not Applicable	ground deformations and failure/liquefaction processes	Not Applicable	Not Applicable	Not Applicable	Not Applicable
https://www.doi.org/10.1016/j.soildyn.2019.105824	683	2019	Wang, Chen; Hawlader, Bipul; Islam, Naveel; Soga, Kenichi	Implementation of a large deformation finite element modelling technique for seismic slope stability analyses	Soil Dynamics and Earthquake Engineering	single landslide analysis	single failure modelling	Not Applicable	Not Applicable	Not Applicable	Not Applicable
https://www.doi.org/10.1016/j.enggeo.2019.105431	684	2020	He, Jianxian; Qi, Shengwen; Wang, Yunsheng; Saroglou, Charalampos	Seismic response of the Lengzhuguan slope caused by topographic and geological effects	Engineering Geology	Not Applicable	ground deformations and failure/liquefaction processes	Not Applicable	Not Applicable	Not Applicable	Not Applicable
https://www.doi.org/10.1016/j.soildyn.2019.105901	685	2020	Song, Jian; Gao, Yufeng; Feng, Tugen	Influence of interactions between topographic and soil layer amplification on seismic response of sliding mass and slope displacement	Soil Dynamics and Earthquake Engineering	Not Applicable	ground deformations and failure/liquefaction processes	Not Applicable	Not Applicable	Not Applicable	Not Applicable
https://www.doi.org/10.1155/2020/8825440	686	2020	Tian, Yun; Wang, Lin-feng; Jin, Hong-hua; Xia, Yu-chao; Zeng, Biao	Failure Mechanism of Horizontal Layered Rock Slope under the Coupling of Earthquake and Weathering	Advances in Civil Engineering	single landslide analysis	single failure geotechnical characterization|single failure modelling	chin_1	Wenchuan-Sichuan	2008-05-12 06:28:01UTC	China
https://www.doi.org/10.1007/s12594-013-0190-8	687	2013	Bai, Shibiao; Xu, Qiang; Wang, Jian; Zhou, Pinggen	Pre-conditioning factors and susceptibility assessments of Wenchuan earthquake landslide at the Zhouqu segment of Bailongjiang basin, China	Journal of the Geological Society of India	regional landslide analysis	regional susceptibility/hazard assessment	chin_1	Wenchuan-Sichuan	2008-05-12 06:28:01UTC	China
https://www.doi.org/10.1785/0120190004	688	2019	Jafarian, Yaser; Lashgari, Ali; Haddad, Abdolhosein	Predictive Model and Probabilistic Assessment of Sliding Displacement for Regional Scale Seismic Landslide Hazard Estimation in IranPredictive Model and Probabilistic Assessment of Sliding Displacement	Bulletin of the Seismological Society of America	regional landslide analysis	regional susceptibility/hazard assessment	Not Applicable	Not Applicable	Not Applicable	Not Applicable
https://www.doi.org/10.1109/JSTARS.2020.3028855	689	2020	Yi, Yaning; Zhang, Wanchang	A New Deep-Learning-Based Approach for Earthquake-Triggered Landslide Detection From Single-Temporal RapidEye Satellite Imagery	IEEE Journal of Selected Topics in Applied Earth Observations and Remote Sensing	regional landslide analysis	regional mapping	chin_2|chin_8	Lushan|Jiuzhaigou County, Sichuan Province	2013-04-20 00:02:47UTC|2017-08-08 13:19:49UTC	China|China
https://www.doi.org/10.1038/s41598-020-73727-4	690	2020	Chen, Lixia; Mei, Le; Zeng, Bin; Yin, Kunlong; Shrestha, Dhruba Pikha; Du, Juan	Failure probability assessment of landslides triggered by earthquakes and rainfall: a case study in Yadong County, Tibet, China	Scientific Reports	regional landslide analysis	regional susceptibility/hazard assessment	ind_2	Sikkim	2011-09-18 12:40:51UTC	India
https://www.doi.org/10.1007/s10346-020-01549-6	691	2020	Ling, Sixiang; Sun, Chunwei; Li, Xiaoning; Ren, Yong; Xu, Jianxiang; Huang, Tao	Characterizing the distribution pattern and geologic and geomorphic controls on earthquake-triggered landslide occurrence during the 2017 Ms 7.0 Jiuzhaigou earthquake, Sichuan, China	Landslides	regional landslide analysis	regional mapping|regional landslide descriptive statistics	chin_8	Jiuzhaigou County, Sichuan Province	2017-08-08 13:19:49UTC	China
https://www.doi.org/10.1007/s11629-020-6314-x	692	2020	Dhakal, Susmita; Cui, Peng; Su, Li-jun; Mavrouli, Olga; Zou, Qiang; Zhang, Jian-qiang; Paudel, Lalu; Shrestha, Nirusha	Landslide susceptibility assessment at Kathmandu Kyirong Highway Corridor in pre-quake, co-seismic and post-quake situations	Journal of Mountain Science	regional landslide analysis	regional susceptibility/hazard assessment	nep_1	Gorkha	2015-04-25 06:11:25UTC	Nepal
https://www.doi.org/10.1007/s12205-020-0508-1	693	2021	Mahalingam, Rubini; Kim, Byungmin	Factors Affecting Occurrence of Landslides Induced by the M7.8 April 2015, Nepal Earthquake	KSCE Journal of Civil Engineering	regional landslide analysis	regional landslide descriptive statistics|regional susceptibility/hazard assessment	nep_1	Gorkha	2015-04-25 06:11:25UTC	Nepal
https://www.doi.org/10.1155/2020/8828385	694	2020	Fu, Xiao; Zhu, Qing; Liu, Chao; Li, Naiwen; Zhuang, Wenhua; Yang, Zhengli; Lu, Heng; Tang, Min	Estimation of Landslides and Road Capacity after August 8, 2017, MS7.0 Jiuzhaigou Earthquake Using High-Resolution Remote Sensing Images	Advances in Civil Engineering	regional landslide analysis	regional mapping|regional risk modelling	chin_8	Jiuzhaigou County, Sichuan Province	2017-08-08 13:19:49UTC	China
https://www.doi.org/10.1016/j.geomorph.2020.107394	695	2020	Cui, Shenghua; Yang, Qingwen; Pei, Xiangjun; Huang, Runqiu; Guo, Bin; Zhang, Weifeng	Geological and morphological study of the Daguangbao landslide triggered by the Ms. 8.0 Wenchuan earthquake, China	Geomorphology	single landslide analysis	single failure mapping	chin_1	Wenchuan-Sichuan	2008-05-12 06:28:01UTC	China
https://www.doi.org/10.3390/rs12233992	696	2020	Zhang, Pengfei; Xu, Chong; Ma, Siyuan; Shao, Xiaoyi; Tian, Yingying; Wen, Boyu	Automatic Extraction of Seismic Landslides in Large Areas with Complex Environments Based on Deep Learning: An Example of the 2018 Iburi Earthquake, Japan	Remote Sensing	regional landslide analysis	regional mapping	jap_6	Hokkaido Eastern Iburi	2018-09-05 18:07:59UTC	Japan
https://www.doi.org/10.1029/2019JB019325	697	2020	Luo, Xingjun; Wang, Changcheng; Long, Yan; Yi, Zhonghai	Analysis of the Decadal Kinematic Characteristics of the Daguangbao Landslide Using Multiplatform Time Series InSAR Observations After the Wenchuan Earthquake	Journal of Geophysical Research: Solid Earth	single landslide analysis	single failure mapping	chin_1	Wenchuan-Sichuan	2008-05-12 06:28:01UTC	China
https://www.doi.org/10.1029/2020JF005669	698	2021	Leshchinsky, Ben; Lehmann, Peter; Or, Dani	Enhanced Rainfall‐Induced Shallow Landslide Activity Following Seismic Disturbance—From Triggering to Healing	Journal of Geophysical Research: Earth Surface	single landslide analysis	single failure modelling	Not Applicable	Not Applicable	Not Applicable	Not Applicable
https://www.doi.org/10.1007/s11069-020-04442-6	699	2021	Pu, Xiaowu; Wan, Lanming; Wang, Ping	Initiation mechanism of mudflow-like loess landslide induced by the combined effect of earthquakes and rainfall	Natural Hazards	single landslide analysis	single failure modelling|single failure geotechnical characterization	chin_3	Minxian-Zhangxian	2013-07-21 23:45:56UTC	China
https://www.doi.org/10.1007/s11356-020-11826-5	700	2021	Chang, Ming; Cui, Peng; Xu, Lu; Zhou, Yu	The spatial distribution characteristics of coseismic landslides triggered by the Ms7.0 Lushan earthquake and Ms7.0 Jiuzhaigou earthquake in southwest China	Environmental Science and Pollution Research	regional landslide analysis	regional landslide comparison|regional landslide descriptive statistics	chin_2|chin_8	Lushan|Jiuzhaigou County, Sichuan Province	2013-04-20 00:02:47UTC|2017-08-08 13:19:49UTC	China|China
https://www.doi.org/10.1007/s10346-020-01578-1	701	2021	Li, Cheng; Su, Lijun	Influence of critical acceleration model on assessments of potential earthquake–induced landslide hazards in Shimian County, Sichuan Province, China	Landslides	regional landslide analysis	regional susceptibility/hazard assessment	Not Applicable	Not Applicable	Not Applicable	Not Applicable
https://www.doi.org/10.1007/s10346-020-01597-y	702	2021	Chen, Guangqi; Xia, Mingyao; Thuy, Dao Thanh; Zhang, Yingbin	A possible mechanism of earthquake-induced landslides focusing on pulse-like ground motions	Landslides	single landslide analysis	single failure modelling	Not Applicable	Not Applicable	Not Applicable	Not Applicable
https://www.doi.org/10.1007/s00603-020-02307-9	703	2021	Xia, Mingyao; Chen, Guangqi; Yu, Pengcheng; Peng, Xinyan; Zou, Jinfeng	Improvement of DDA with a New Unified Tensile Fracture Model for Rock Fragmentation and its Application on Dynamic Seismic Landslides	Rock Mechanics and Rock Engineering	single landslide analysis	single failure modelling	chin_1	Wenchuan-Sichuan	2008-05-12 06:28:01UTC	China
https://www.doi.org/10.1007/s00477-020-01959-x	704	2021	Luo, Luguang; Lombardo, Luigi; van Westen, Cees; Pei, Xiangjun; Huang, Runqiu	From scenario-based seismic hazard to scenario-based landslide hazard: rewinding to the past via statistical simulations	Stochastic Environmental Research and Risk Assessment	regional landslide analysis	regional susceptibility/hazard assessment	chin_8	Jiuzhaigou County, Sichuan Province	2017-08-08 13:19:49UTC	China
https://www.doi.org/10.1007/s10346-020-01608-y	705	2021	Zhu, Ling; Cui, Shenghua; Pei, Xiangjun; Wang, Shanyong; He, Shuang; Shi, Xingxing	Experimental investigation on the seismically induced cumulative damage and progressive deformation of the 2017 Xinmo landslide in China	Landslides	Not Applicable	Not Applicable	Not Applicable	Not Applicable	Not Applicable	Not Applicable
https://www.doi.org/10.1029/2020GL090509	706	2021	Fan, Xuanmei; Yunus, Ali P.; Scaringi, Gianvito; Catani, Filippo; Siva Subramanian, Srikrishnan; Xu, Qiang; Huang, Runqui	Rapidly Evolving Controls of Landslides After a Strong Earthquake and Implications for Hazard Assessments	Geophysical Research Letters	regional landslide analysis	regional susceptibility/hazard assessment	chin_1	Wenchuan-Sichuan	2008-05-12 06:28:01UTC	China
https://www.doi.org/10.3389/feart.2020.633342	707	2021	Peng, Du; Yueren, Xu; Qinjian, Tian; Wenqiao, Li	Using Google Earth Images to Extract Dense Landslides Induced by Historical Earthquakes at the Southwest of Ordos, China	Frontiers in Earth Science	regional landslide analysis	regional mapping	Not Applicable	Not Applicable	Not Applicable	Not Applicable
https://www.doi.org/10.1007/s10064-021-02106-8	708	2021	Ghaedi Vanani, Ali Asghar; Shoaei, Gholamreza; Zare, Mehdi	Statistical analyses of landslide size and spatial distribution triggered by 1990 Rudbar-Manjil (Mw 7.3) earthquake, northern Iran: revised inventory, and controlling factors	Bulletin of Engineering Geology and the Environment	regional landslide analysis	regional mapping|regional landslide descriptive statistics	ira_2	Rudbar–Manjil	1990-06-20 21:00:09UTC	Iran
https://www.doi.org/10.1007/s10346-020-01615-z	709	2021	Di, Baofeng; Katsenis, Loukas; Stamatopoulos, Constantine A.; Panoskaltsis, Vassilis P.	Sliding element simulating the response of slip surfaces and its application for the prediction of earthquake-induced landslide movement using one-dimensional dynamic analyses	Landslides	single landslide analysis	single failure modelling	jap_3	Hyogo-ken Nanbu (Kobe)	1995-01-16 20:46:52UTC	Japan
https://www.doi.org/10.1007/s12517-021-06573-x	710	2021	Liu, Rui; Li, Luyao; Pirasteh, Saied; Lai, Zili; Yang, Xin; Shahabi, Himan	The performance quality of LR, SVM, and RF for earthquake-induced landslides susceptibility mapping incorporating remote sensing imagery	Arabian Journal of Geosciences	regional landslide analysis	regional mapping|regional susceptibility/hazard assessment	chin_8	Jiuzhaigou County, Sichuan Province	2017-08-08 13:19:49UTC	China
https://www.doi.org/10.3390/geosciences11020095	711	2021	Nonomura, Atsuko; Hasegawa, Shuichi; Abe, Tatsuya; Mukoyama, Sakae; Kaneda, Yoshiyuki	Validation of an Index for Susceptibility to Earthquake-Induced Landslides Derived from Helicopter-Borne Electromagnetic Resistivity and Digital Elevation Data	Geosciences	regional landslide analysis	regional susceptibility/hazard assessment	jap_2	Kumamoto	2016-04-15 16:25:06UTC	Japan
https://www.doi.org/10.3389/feart.2020.605003	712	2021	Frigerio Porta, Gabriele; Bebbington, Mark; Xiao, Xun; Jones, Geoff	A Statistical Model for Earthquake And/Or Rainfall Triggered Landslides	Frontiers in Earth Science	regional landslide analysis	regional susceptibility/hazard assessment	Not Applicable	Not Applicable	Not Applicable	Not Applicable
https://www.doi.org/10.1007/s10346-021-01636-2	713	2021	Lu, Ping; Shi, Wenyang; Wang, Qunming; Li, Zhongbin; Qin, Yuanyuan; Fan, Xuanmei	Co-seismic landslide mapping using Sentinel-2 10-m fused NIR narrow, red-edge, and SWIR bands	Landslides	regional landslide analysis	regional mapping	jap_6|chin_9	Hokkaido Eastern Iburi|Nyingchi	2018-09-05 18:07:59UTC|2017-11-18 00:32:01UTC	Japan|China
https://www.doi.org/10.21660/2021.79.GX192	714	2021	Kohno, Masanori	Evaluation of earthquake-induced slope failure distribution using the AHP method and GIS	International Journal of GEOMATE	regional landslide analysis	regional susceptibility/hazard assessment	Not Applicable	Not Applicable	Not Applicable	Not Applicable
https://www.doi.org/10.5194/nhess-12-3177-2012	715	2012	Caputo, R.; Papathanassiou, G.	Brief communication "Ground failure and liquefaction phenomena triggered by the 20 May 2012 Emilia-Romagna (Northern Italy) earthquake: case study of Sant'Agostino–San Carlo–Mirabello zone"	Natural Hazards and Earth System Sciences	Not Applicable	ground deformations and failure/liquefaction processes	ita_14	4 km NNE of Massa Finalese	2012-05-20 02:03:52UTC	Italy
https://www.doi.org/10.1785/BSSA08601BS300	716	1996	Stewart, Jonathan P.; Seed, Raymond B.; Bray, Jonathan D.	Incidents of ground failure from the 1994 Northridge earthquake	Bulletin of the Seismological Society of America	Not Applicable	ground deformations and failure/liquefaction processes	usa_4	Northridge	1994-01-17 12:30:55UTC	USA
https://www.doi.org/10.1785/BSSA08601BS262	717	1996	Real, Charles R.; DeLisle, Mark J.; McCrink, Timothy	Provisional seismic zoning for ground failures in portions of Los Angeles and Ventura counties following the 17 January 1994 Northridge earthquake	Bulletin of the Seismological Society of America	regional landslide analysis	regional susceptibility/hazard assessment	usa_4	Northridge	1994-01-17 12:30:55UTC	USA
https://www.doi.org/10.1785/BSSA0860030636	718	1996	Tuttle, Martitia; Barstow, Noël	Liquefaction-related ground failure: A case study in the New Madrid seismic zone, central United States	Bulletin of the Seismological Society of America	Not Applicable	ground deformations and failure/liquefaction processes|historical/Holocene landslides	usa_9|usa_10|usa_11	New Madrid 1|New Madrid 2|New Madrid 3	1811-12-16|1812-01-23|1812-02-07	USA|USA|USA
https://www.doi.org/10.1016/S0267-7261(02)00134-3	719	2002	Cetin, K. Onder; Youd, T. Leslie; Seed, Raymond B; Bray, Jonathan D; Sancio, Rodolfo; Lettis, W; Yilmaz, M. Tolga; Durgunoglu, H. Turan	Liquefaction-induced ground deformations at Hotel Sapanca during Kocaeli (Izmit),Turkey earthquake	Soil Dynamics and Earthquake Engineering	Not Applicable	ground deformations and failure/liquefaction processes	turk_1	Kocaeli	1999-08-17 00:01:39UTC	Turkey
https://www.doi.org/10.1016/S0013-7952(03)00130-3	720	2004	Yuan, Haiming; Hui Yang, Susan; Andrus, Ronald D; Hsein Juang, C	Liquefaction-induced ground failure: a study of the Chi-Chi earthquake cases	Engineering Geology	Not Applicable	ground deformations and failure/liquefaction processes	taiw_1	Chi Chi	1999-09-20 17:47:18UTC	Taiwan
https://www.doi.org/10.1016/j.cageo.2003.08.011	721	2004	Liu, G. X.; Ding, X. L.; Li, Z. L.; Li, Z. W.; Chen, Y. Q.; Yu, S. B.	Pre- and co-seismic ground deformations of the 1999 Chi-Chi, Taiwan earthquake, measured with SAR interferometry	Computers & Geosciences	Not Applicable	ground deformations and failure/liquefaction processes	taiw_1	Chi Chi	1999-09-20 17:47:18UTC	Taiwan
https://www.doi.org/10.1002/eqe.666	722	2007	Jousset, P.; Douglas, J.	Long-period earthquake ground displacements recorded on Guadeloupe (French Antilles)	Earthquake Engineering & Structural Dynamics	Not Applicable	ground deformations and failure/liquefaction processes	Not Applicable	Not Applicable	Not Applicable	Not Applicable
https://www.doi.org/10.1007/s00254-007-0803-x	723	2008	Aydan, Ömer; Ulusay, Reşat; Atak, Veysel Okan	Evaluation of ground deformations induced by the 1999 Kocaeli earthquake (Turkey) at selected sites on shorelines	Environmental Geology	Not Applicable	ground deformations and failure/liquefaction processes	turk_1	Kocaeli	1999-08-17 00:01:39UTC	Turkey
https://www.doi.org/10.1007/s11001-009-9074-0	724	2009	Buchner, Elmar; Kröchert, Jörg	A record of long-time rift activity and earthquake-induced ground effects in Pleistocene deposits of southern Tenerife (Canary Islands, Spain)	Marine Geophysical Researches	Not Applicable	ground deformations and failure/liquefaction processes	Not Applicable	Not Applicable	Not Applicable	Not Applicable
https://www.doi.org/10.1016/j.soildyn.2009.10.008	725	2010	Rupakhety, R.; Sigbjörnsson, R.	A note on the L’Aquila earthquake of 6 April 2009: Permanent ground displacements obtained from strong-motion accelerograms	Soil Dynamics and Earthquake Engineering	Not Applicable	ground deformations and failure/liquefaction processes	ita_15	Aquila	2009-04-06 01:32:39UTC	Italy
https://www.doi.org/10.1029/2010JB007579	726	2010	Guerrieri, L.; Baer, G.; Hamiel, Y.; Amit, R.; Blumetti, A. M.; Comerci, V.; Di Manna, P.; Michetti, A. M.; Salamon, A.; Mushkin, A.; Sileo, G.; Vittori, E.	InSAR data as a field guide for mapping minor earthquake surface ruptures: Ground displacements along the Paganica Fault during the 6 April 2009 L'Aquila earthquake	Journal of Geophysical Research	Not Applicable	ground deformations and failure/liquefaction processes	ita_15	Aquila	2009-04-06 01:32:39UTC	Italy
https://www.doi.org/10.1016/j.ijdrr.2020.101924	727	2020	Saganeiti, Lucia; Amato, Federico; Nolè, Gabriele; Vona, Marco; Murgante, Beniamino	Early estimation of ground displacements and building damage after seismic events using SAR and LiDAR data: The case of the Amatrice earthquake in central Italy, on 24th August 2016	International Journal of Disaster Risk Reduction	Not Applicable	ground deformations and failure/liquefaction processes	ita_4	Amatrice	2016-08-24 01:36:32UTC	Italy
https://www.doi.org/10.1130/B35269.1	728	2020	Struble, William T.; Roering, Joshua J.; Black, Bryan A.; Burns, William J.; Calhoun, Nancy; Wetherell, Logan	Dendrochronological dating of landslides in western Oregon: Searching for signals of the Cascadia A.D. 1700 earthquake	GSA Bulletin	Not Applicable	historical/Holocene landslides	Not Applicable	Not Applicable	Not Applicable	Not Applicable
https://www.doi.org/10.1016/j.enggeo.2014.08.017	729	2014	Lv, Yan; Peng, Jianbing; Wang, Genlong	Characteristics and genetic mechanism of the Cuihua Rock Avalanche triggered by a paleo-earthquake in northwest China	Engineering Geology	Not Applicable	historical/Holocene landslides	Not Applicable	Not Applicable	Not Applicable	Not Applicable
https://www.doi.org/10.1007/s11069-014-1186-4	730	2014	Asadi, Zeynab; Zare, Mehdi	Estimating magnitudes of prehistoric earthquakes and seismic capability of fault from landslide data in Noor valley (central Alborz, Iran)	Natural Hazards	Not Applicable	historical/Holocene landslides	Not Applicable	Not Applicable	Not Applicable	Not Applicable
https://www.doi.org/10.1016/j.quageo.2014.02.002	731	2014	Merchel, Silke; Mrak, Irena; Braucher, Régis; Benedetti, Lucilla; Repe, Blaž; Bourlès, Didier L.; Reitner, Jürgen M.	Surface exposure dating of the Veliki vrh rock avalanche in Slovenia associated with the 1348 earthquake	Quaternary Geochronology	Not Applicable	historical/Holocene landslides	Not Applicable	Not Applicable	Not Applicable	Not Applicable
https://www.doi.org/10.1007/s12665-013-2654-y	732	2014	Kojima, Satoru; Nozaki, Tamotsu; Nagata, Hidehisa; Tanahashi, Ryota; Kondo, Ryoich; Okamura, Noriaki; Suzuki, Kazuhiro; Ikeda, Akiko; Nakamura, Toshio; Ohtani, Tomoyuki	Large-scale landslides in Toyama Prefecture, central Japan, and their probable relationship with earthquakes	Environmental Earth Sciences	Not Applicable	historical/Holocene landslides	Not Applicable	Not Applicable	Not Applicable	Not Applicable
https://www.doi.org/10.1007/s10518-013-9504-x	733	2014	Bilham, Roger; Bali, Bikram Singh	A ninth century earthquake-induced landslide and flood in the Kashmir Valley, and earthquake damage to Kashmir’s Medieval temples	Bulletin of Earthquake Engineering	Not Applicable	historical/Holocene landslides	Not Applicable	Not Applicable	Not Applicable	Not Applicable
https://www.doi.org/10.1016/S0169-555X(98)00080-4	734	1999	Wayne, William J.	The Alemania rockfall dam: A record of a mid-holocene earthquake and catastrophic flood in northwestern Argentina	Geomorphology	Not Applicable	water environment landslides|historical/Holocene landslides	Not Applicable	Not Applicable	Not Applicable	Not Applicable
https://www.doi.org/10.2183/pjab.78.111	735	2002	Suzuki, Kazuhiro; Ikeda, Akiko; Adachi, Kaori; Dunkley, Daniel; Niu, Etsuko; Kato, Takenori; Mori, Shinobu; Fujii, Noriyuki	Finding of the legendary lake Umi in the Kamiyahagi area of Gifu Prefecture; a lake-damming rock avalanche triggered by Tensho Earthquake in 1586	Proceedings of the Japan Academy, Series B	Not Applicable	water environment landslides|historical/Holocene landslides	Not Applicable	Not Applicable	Not Applicable	Not Applicable
https://www.doi.org/10.1016/S0169-555X(02)00074-0	736	2002	Nicoletti, Pier Giorgio; Parise, Mario	Seven landslide dams of old seismic origin in southeastern Sicily (Italy)	Geomorphology	Not Applicable	water environment landslides|historical/Holocene landslides	Not Applicable	Not Applicable	Not Applicable	Not Applicable
https://www.doi.org/10.1130/B25158.1	737	2004	Karlin, Robert E.; Holmes, Mark; Abella, S. E. B.; Sylwester, Richard	Holocene landslides and a 3500-year record of Pacific Northwest earthquakes from sediments in Lake Washington	GSA Bulletin	Not Applicable	water environment landslides|historical/Holocene landslides	Not Applicable	Not Applicable	Not Applicable	Not Applicable
https://www.doi.org/10.1016/j.rgg.2007.06.013	738	2008	Nepop, R.K.; Agatova, A.R.	Estimating magnitudes of prehistoric earthquakes from landslide data: first experience in southeastern Altai	Russian Geology and Geophysics	Not Applicable	historical/Holocene landslides	rus_2	Chuya	2003-09-27 11:33:25UTC	Russia
https://www.doi.org/10.20965/jdr.2010.p0245	739	2010	Inoue, Kimio; Mizuyama, Takahisa; Sakatani, Yukihiko; Sabo Frontier Foundation, SABO-Kaikan Annex 6F, 2-7-4 Hirakawacho, Chiyoda-ku, Tokyo 102-0093, Japan; Graduate School of Agriculture, Kyoto University, Kitashirakawa Oiwakecho, Sakyo-ku, Kyoto 606-8502, Japan; Tateyama Mountain Area Sabo Office, Ministry of Land, Infrastructure and Transport, Ashikuraji-Bunasaka 61, Tateyama Machi, Toyama 930-…	The Catastrophic Tombi Landslide and Accompanying Landslide Dams Induced by the 1858 Hietsu Earthquake	Journal of Disaster Research	Not Applicable	water environment landslides|historical/Holocene landslides	jap_16	Hietsu earthquake	1858-04-09	Japan
https://www.doi.org/10.1007/s12517-016-2742-x	740	2016	Xiong, Jianguo; Li, Youli; Si, Supei; Lv, Shenghua; Wang, Yiran; Zhong, Yuezhi; Xin, Weilin; Ci, Hongjuan	A rock fall of the north Zhongtiao Shan fault and the Yongji earthquake in 793, Shanxi Province, North China	Arabian Journal of Geosciences	Not Applicable	historical/Holocene landslides	Not Applicable	Not Applicable	Not Applicable	Not Applicable
https://www.doi.org/10.17850/njg98-3-03	741	2018	Mangerud, Jan; Birks, Hilary H.; Halvorsen, Lene S.; Hughes, Anna L.C.; Nashoug, Ole; Nystuen, Johan Petter; Paus, Aage; Sørensen, Rolf; Svendsen, John Inge	The timing of deglaciation and sequence of pioneer vegetation at Ringsaker, eastern Norway – and an earthquake-triggered landslide	Norwegian Journal of Geology	Not Applicable	historical/Holocene landslides	Not Applicable	Not Applicable	Not Applicable	Not Applicable
https://www.doi.org/10.1007/s12371-014-0132-x	742	2015	Wang, Genlong	Geoheritage Features in Xi’an, China: Cuihua Rock Avalanche Likely Originating from an Ancient Earthquake	Geoheritage	Not Applicable	historical/Holocene landslides	Not Applicable	Not Applicable	Not Applicable	Not Applicable
https://www.doi.org/10.1016/j.enggeo.2017.06.001	743	2017	Zhang, Zelin; Wang, Tao; Wu, Shuren; Tang, Huiming; Liang, Changyu	The role of seismic triggering in a deep-seated mudstone landslide, China: Historical reconstruction and mechanism analysis	Engineering Geology	Not Applicable	historical/Holocene landslides	Not Applicable	Not Applicable	Not Applicable	Not Applicable
https://www.doi.org/10.1016/j.quageo.2017.12.004	744	2018	Yamada, Ryuji; Kariya, Yoshihiko; Kimura, Takashi; Sano, Masaki; Li, Zhen; Nakatsuka, Takeshi	Age determination on a catastrophic rock avalanche using tree-ring oxygen isotope ratios - the scar of a historical gigantic earthquake in the Southern Alps, central Japan	Quaternary Geochronology	Not Applicable	historical/Holocene landslides	Not Applicable	Not Applicable	Not Applicable	Not Applicable
https://www.doi.org/10.1007/s00024-019-02390-2	745	2020	Pranantyo, Ignatius Ryan; Cummins, Phil R.	The 1674 Ambon Tsunami: Extreme Run-Up Caused by an Earthquake-Triggered Landslide	Pure and Applied Geophysics	Not Applicable	water environment landslides|historical/Holocene landslides	indo_3	Ambon	1674-02-17	Indonesia
https://www.doi.org/10.1177/0959683620950389	746	2020	Koukouvelas, Ioannis K; Piper, David JW; Katsonopoulou, Dora; Kontopoulos, Nikolaos; Verroios, Sotirios; Nikolakopoulos, Konstantinos; Zygouri, Vasiliki	Earthquake-triggered landslides and mudflows: Was this the wave that engulfed Ancient Helike?	The Holocene	Not Applicable	historical/Holocene landslides	Not Applicable	Not Applicable	Not Applicable	Not Applicable
https://www.doi.org/10.1016/j.quascirev.2020.106527	747	2020	Kitamura, Akihisa; Yamada, Kazuyoshi; Sugawara, Daisuke; Yokoyama, Yusuke; Miyairi, Yosuke; Hirakawa, Miki; Iwatsuki, Daichi; Katagiri, Satoru; Maeda, Masaya; Mori, Hideki; Nakai, Yuki; Okazaki, Sota; Sakamoto, Yui; Sasada, Masaki; Seki, Yusuke; Takikawa, Youki; Yamamoto, Yuka; Yoda, Yuki	Tsunamis and submarine landslides in Suruga Bay, central Japan, caused by Nankai–Suruga Trough megathrust earthquakes during the last 5000 years	Quaternary Science Reviews	Not Applicable	water environment landslides|historical/Holocene landslides	Not Applicable	Not Applicable	Not Applicable	Not Applicable
https://www.doi.org/10.1016/j.quaint.2020.07.006	748	2020	Torabi, Mehdi; Fattahi, Morteza; Amini, Hamideh; Ghassemi, Mohammad R.; Karimi, Nasrin	OSL dating of landslide-dammed-lake deposits in the North of Tehran, Iran: 958 Ray-Taleghan/Ruyan earthquake	Quaternary International	Not Applicable	historical/Holocene landslides	Not Applicable	Not Applicable	Not Applicable	Not Applicable
https://www.doi.org/10.1007/s11069-020-04471-1	749	2021	Zhao, Bo; Wang, Yunsheng; Wu, Junfeng; Su, Lijun; Liu, Jiangwei; Jin, Gang	The Mogangling giant landslide triggered by the 1786 Moxi M 7.75 earthquake, China	Natural Hazards	Not Applicable	historical/Holocene landslides	chin_7	Moxi	1786-06-01	China
https://www.doi.org/10.1126/sciadv.aaz6446	750	2020	Wang, Jin; Howarth, Jamie D.; McClymont, Erin L.; Densmore, Alexander L.; Fitzsimons, Sean J.; Croissant, Thomas; Gröcke, Darren R.; West, Martin D.; Harvey, Erin L.; Frith, Nicole V.; Garnett, Mark H.; Hilton, Robert G.	Long-term patterns of hillslope erosion by earthquake-induced landslides shape mountain landscapes	Science Advances	Not Applicable	Landscape evolution	Not Applicable	Not Applicable	Not Applicable	Not Applicable
https://www.doi.org/10.5194/nhess-15-817-2015	751	2015	Yang, W. T.; Wang, M.; Kerle, N.; Van Westen, C. J.; Liu, L. Y.; Shi, P. J.	Analysis of changes in post-seismic landslide distribution and its effect on building reconstruction	Natural Hazards and Earth System Sciences	regional landslide analysis	regional risk modelling	chin_1	Wenchuan-Sichuan	2008-05-12 06:28:01UTC	China
https://www.doi.org/10.5194/nhess-12-3031-2012	752	2012	Fan, X.; Tang, C. X.; van Westen, C. J.; Alkema, D.	Simulating dam-breach flood scenarios of the Tangjiashan landslide dam induced by the Wenchuan Earthquake	Natural Hazards and Earth System Sciences	Not Applicable	water environment landslides	chin_1	Wenchuan-Sichuan	2008-05-12 06:28:01UTC	China
https://www.doi.org/10.1016/j.enggeo.2006.02.014	753	2006	Chang, Kuo-Jen; Taboada, Alfredo; Chan, Yu-Chang; Dominguez, Stéphane	Post-seismic surface processes in the Jiufengershan landslide area, 1999 Chi-Chi earthquake epicentral zone, Taiwan	Engineering Geology	Not Applicable	Landscape evolution	taiw_1	Chi Chi	1999-09-20 17:47:18UTC	Taiwan
https://www.doi.org/10.1016/j.tecto.2007.02.009	754	2007	Gallousi, Christina; Koukouvelas, Ioannis K.	Quantifying geomorphic evolution of earthquake-triggered landslides and their relation to active normal faults. An example from the Gulf of Corinth, Greece	Tectonophysics	Not Applicable	Landscape evolution	Not Applicable	Not Applicable	Not Applicable	Not Applicable
https://www.doi.org/10.1016/j.enggeo.2007.07.008	755	2007	Katz, Oded; Crouvi, Onn	The geotechnical effects of long human habitation (2000< years): Earthquake induced landslide hazard in the city of Zefat, northern Israel	Engineering Geology	regional landslide analysis	regional susceptibility/hazard assessment	Not Applicable	Not Applicable	Not Applicable	Not Applicable
https://www.doi.org/10.1007/s10346-015-0594-1	756	2016	Li, Lingjing; Yao, Xin; Zhang, Yongshuang; Iqbal, Javed; Chen, Jian; Zhou, Nengjuan	Surface recovery of landslides triggered by 2008 Ms8.0 Wenchuan earthquake (China): a case study in a typical mountainous watershed	Landslides	Not Applicable	Vegetation and EQILs	chin_1	Wenchuan-Sichuan	2008-05-12 06:28:01UTC	China
https://www.doi.org/10.1007/s00024-019-02388-w	757	2020	Mueller, Christof; Micallef, Aaron; Spatola, Daniele; Wang, Xiaoming	The Tsunami Inundation Hazard of the Maltese Islands (Central Mediterranean Sea): A Submarine Landslide and Earthquake Tsunami Scenario Study	Pure and Applied Geophysics	Not Applicable	water environment landslides	Not Applicable	Not Applicable	Not Applicable	Not Applicable
https://www.doi.org/10.1016/j.sedgeo.2019.01.002	758	2019	Moernaut, J.; Van Daele, M.; Heirman, K.; Wiemer, G.; Molenaar, A.; Vandorpe, T.; Melnick, D.; Hajdas, I.; Pino, M.; Urrutia, R.; De Batist, M.	The subaqueous landslide cycle in south-central Chilean lakes: The role of tephra, slope gradient and repeated seismic shaking	Sedimentary Geology	Not Applicable	water environment landslides	Not Applicable	Not Applicable	Not Applicable	Not Applicable
https://www.doi.org/10.1080/21664250.2020.1780719	759	2020	Aránguiz, Rafael; Esteban, Miguel; Takagi, Hiroshi; Mikami, Takahito; Takabatake, Tomoyuki; Gómez, Matías; González, Juan; Shibayama, Tomoya; Okuwaki, Ryo; Yagi, Yuji; Shimizu, Kousuke; Achiari, Hendra; Stolle, Jacob; Robertson, Ian; Ohira, Koichiro; Nakamura, Ryota; Nishida, Yuta; Krautwald, Clemens; Goseberg, Nils; Nistor, Ioan	The 2018 Sulawesi tsunami in Palu city as a result of several landslides and coseismic tsunamis	Coastal Engineering Journal	Not Applicable	water environment landslides	indo_1	Palu	2018-09-28 10:02:45UTC	Indonesia
https://www.doi.org/10.1016/j.apor.2019.101964	760	2019	Nian, Ting-kai; Guo, Xing-sen; Zheng, De-feng; Xiu, Zong-xiang; Jiang, Zheng-bo	Susceptibility assessment of regional submarine landslides triggered by seismic actions	Applied Ocean Research	Not Applicable	water environment landslides	Not Applicable	Not Applicable	Not Applicable	Not Applicable
https://www.doi.org/10.3390/geosciences9010010	761	2018	Lenz, Brandi; Sawyer, Derek; Phrampus, Benjamin; Davenport, Kathy; Long, Ashley	Seismic Imaging of Seafloor Deformation Induced by Impact from Large Submarine Landslide Blocks, Offshore Oregon	Geosciences	Not Applicable	water environment landslides	Not Applicable	Not Applicable	Not Applicable	Not Applicable
https://www.doi.org/10.1016/j.margeo.2020.106296	762	2020	Collico, Stefano; Arroyo, Marcos; Urgeles, Roger; Gràcia, Eulàlia; Devincenzi, Marcelo; Peréz, Norma	Probabilistic mapping of earthquake-induced submarine landslide susceptibility in the South-West Iberian margin	Marine Geology	Not Applicable	water environment landslides	Not Applicable	Not Applicable	Not Applicable	Not Applicable
https://www.doi.org/10.3390/jmse7050154	763	2019	Perez del Postigo Prieto, Natalia; Raby, Alison; Whittaker, Colin; Boulton, Sarah J.	Parametric Study of Tsunamis Generated by Earthquakes and Landslides	Journal of Marine Science and Engineering	Not Applicable	water environment landslides	Not Applicable	Not Applicable	Not Applicable	Not Applicable
https://www.doi.org/10.1007/s10346-018-1035-8	764	2018	Jiang, Mingjing; Shen, Zhifu; Wu, Di	CFD-DEM simulation of submarine landslide triggered by seismic loading in methane hydrate rich zone	Landslides	Not Applicable	water environment landslides	Not Applicable	Not Applicable	Not Applicable	Not Applicable
https://www.doi.org/10.1680/jphmg.18.00048	765	2020	Takahashi, Hidenori; Fujii, Naruhiko; Sassa, Shinji	Centrifuge model tests of earthquake-induced submarine landslide	International Journal of Physical Modelling in Geotechnics	Not Applicable	water environment landslides	Not Applicable	Not Applicable	Not Applicable	Not Applicable
https://www.doi.org/10.1007/s10346-019-01166-y	766	2019	Takagi, Hiroshi; Pratama, Munawir Bintang; Kurobe, Shota; Esteban, Miguel; Aránguiz, Rafael; Ke, Bowei	Analysis of generation and arrival time of landslide tsunami to Palu City due to the 2018 Sulawesi earthquake	Landslides	Not Applicable	water environment landslides	indo_1	Palu	2018-09-28 10:02:45UTC	Indonesia
https://www.doi.org/10.1002/2014JB011514	767	2014	Parsons, Tom; Geist, Eric L.; Ryan, Holly F.; Lee, Homa J.; Haeussler, Peter J.; Lynett, Patrick; Hart, Patrick E.; Sliter, Ray; Roland, Emily	Source and progression of a submarine landslide and tsunami: The 1964 Great Alaska earthquake at Valdez: 1964 Alaska landslide tsunamis	Journal of Geophysical Research: Solid Earth	Not Applicable	water environment landslides	usa_2	Alaska	1964-03-28 03:36:16UTC	USA
https://www.doi.org/10.1007/s00367-014-0373-3	768	2014	Ai, Fei; Strasser, Michael; Preu, Benedict; Hanebuth, Till J. J.; Krastel, Sebastian; Kopf, Achim	New constraints on oceanographic vs. seismic control on submarine landslide initiation: a geotechnical approach off Uruguay and northern Argentina	Geo-Marine Letters	Not Applicable	water environment landslides	Not Applicable	Not Applicable	Not Applicable	Not Applicable
https://www.doi.org/10.1029/2011GC003839	769	2011	Masson, D. G.; Arzola, R. G.; Wynn, R. B.; Hunt, J. E.; Weaver, P. P. E.	Seismic triggering of landslides and turbidity currents offshore Portugal: SEISMIC TRIGGERING OF TURBIDITY CURRENTS	Geochemistry, Geophysics, Geosystems	Not Applicable	water environment landslides|historical/Holocene landslides	Not Applicable	Not Applicable	Not Applicable	Not Applicable
https://www.doi.org/10.1007/s00024-010-0228-4	770	2011	Suleimani, Elena; Nicolsky, Dmitry J.; Haeussler, Peter J.; Hansen, Roger	Combined Effects of Tectonic and Landslide-Generated Tsunami Runup at Seward, Alaska During the M W 9.2 1964 Earthquake	Pure and Applied Geophysics	Not Applicable	water environment landslides	usa_2	Alaska	1964-03-28 03:36:16UTC	USA
https://www.doi.org/10.2112/1551-5036(2004)20[277:CSFITS]2.0.CO;2	771	2004	Mosher, D. C.; Monahan, P. A.; Barrie, J. V.; Courtney, R. C.	Coastal Submarine Failures in the Strait of Georgia, British Columbia: Landslides of the 1946 Vancouver Island Earthquake*	Journal of Coastal Research	Not Applicable	water environment landslides	can_3	Vancouver Island	1946-06-23 17:13:19UTC	Canada
https://www.doi.org/10.1016/j.geomorph.2005.04.017	772	2005	Dai, F. C.; Lee, C. F.; Deng, J. H.; Tham, L. G.	The 1786 earthquake-triggered landslide dam and subsequent dam-break flood on the Dadu River, southwestern China	Geomorphology	Not Applicable	water environment landslides|historical/Holocene landslides	chin_7	Moxi	1786-06-01	China
https://www.doi.org/10.3319/TAO.2008.19.6.767(PT)	773	2008	Hsu, Shu-Kun; Kuo, Jackie; Lo, Chung-Liang; Tsai, Ching-Hui; Doo, Wen-Bin; Ku, Chia-Yen; Sibuet, Jean-Claude	Turbidity Currents, Submarine Landslides and the 2006 Pingtung Earthquake off SW Taiwan	Terrestrial, Atmospheric and Oceanic Sciences	Not Applicable	water environment landslides	taiw_3|taiw_4	30 km SW of Hengchun|26 km W of Hengchun	2006-12-26 12:26:21UTC|2006-12-26 12:34:13UTC	Taiwan|Taiwan
https://www.doi.org/10.1785/0120070192	774	2008	Gerardi, F.; Barbano, M. S.; De Martini, P. M.; Pantosti, D.	Discrimination of Tsunami Sources (Earthquake versus Landslide) on the Basis of Historical Data in Eastern Sicily and Southern Calabria	Bulletin of the Seismological Society of America	Not Applicable	water environment landslides	ita_13|ita_17|ita_18	Terremoto delle Calabrie|eastern sicily-offshore|Messina strait	1783-02-06|1693-01-09|1908-12-28 04:20:26UTC	Italy|Italy|Italy
https://www.doi.org/10.1016/j.margeo.2008.05.011	775	2009	ten Brink, Uri S.; Lee, Homa J.; Geist, Eric L.; Twichell, David	Assessment of tsunami hazard to the U.S. East Coast using relationships between submarine landslides and earthquakes	Marine Geology	Not Applicable	water environment landslides	Not Applicable	Not Applicable	Not Applicable	Not Applicable
https://www.doi.org/10.1007/s10064-009-0214-1	776	2009	Xu, Qiang; Fan, Xuan-Mei; Huang, Run-Qiu; Westen, Cee Van	Landslide dams triggered by the Wenchuan Earthquake, Sichuan Province, south west China	Bulletin of Engineering Geology and the Environment	Not Applicable	water environment landslides	chin_1	Wenchuan-Sichuan	2008-05-12 06:28:01UTC	China
https://www.doi.org/10.1029/2009GL039135	777	2009	Favalli, Massimiliano; Boschi, Enzo; Mazzarini, Francesco; Pareschi, Maria Teresa	Seismic and landslide source of the 1908 Straits of Messina tsunami (Sicily, Italy)	Geophysical Research Letters	Not Applicable	water environment landslides	ita_18	Messina strait	1908-12-28 04:20:26UTC	Italy
https://www.doi.org/10.1007/s10346-009-0160-9	778	2009	Cui, Peng; Zhu, Ying-yan; Han, Yong-shun; Chen, Xiao-qing; Zhuang, Jian-qi	The 12 May Wenchuan earthquake-induced landslide lakes: distribution and preliminary risk evaluation	Landslides	Not Applicable	water environment landslides	chin_1	Wenchuan-Sichuan	2008-05-12 06:28:01UTC	China
https://www.doi.org/10.1017/S0033822200046178	779	2010	Goto, Akiko S; Muramatsu, Takeshi; Teraoka, Yoshiji	Timing of the Landslide-Dammed Lake Triggered by Earthquake, at Toyama River, Central Japan	Radiocarbon	Not Applicable	water environment landslides|historical/Holocene landslides	jap_15	Totomi-Jishin	714	Japan
https://www.doi.org/10.1007/s00531-015-1144-8	780	2015	Wiemer, Gauvain; Moernaut, Jasper; Stark, Nina; Kempf, Philipp; De Batist, Marc; Pino, Mario; Urrutia, Roberto; de Guevara, Bruno Ladrón; Strasser, Michael; Kopf, Achim	The role of sediment composition and behavior under dynamic loading conditions on slope failure initiation: a study of a subaqueous landslide in earthquake-prone South-Central Chile	International Journal of Earth Sciences	Not Applicable	water environment landslides|historical/Holocene landslides	Not Applicable	Not Applicable	Not Applicable	Not Applicable
https://www.doi.org/10.1007/s00367-017-0493-7	781	2017	Milia, Alfonsa; Iannace, Pietro; Torrente, Maurizio M.	Active tectonic structures and submarine landslides offshore southern Apulia (Italy): a new scenario for the 1743 earthquake and subsequent tsunami	Geo-Marine Letters	Not Applicable	water environment landslides|historical/Holocene landslides	ita_16	offshore southern Apulia	1743-02-20	Italy
https://www.doi.org/10.1007/s11069-017-3032-y	782	2018	Strupler, M.; Danciu, L.; Hilbe, M.; Kremer, K.; Anselmetti, F. S.; Strasser, M.; Wiemer, S.	A subaqueous hazard map for earthquake-triggered landslides in Lake Zurich, Switzerland	Natural Hazards	Not Applicable	water environment landslides|historical/Holocene landslides	Not Applicable	Not Applicable	Not Applicable	Not Applicable
https://www.doi.org/10.3319/TAO.2017.05.08.01	783	2018	Hsu, Huai-Houh; Dong, Jia-Jyun; Hsu, Shu-Kun; Su, Chih-Chieh	Back analysis of an earthquake-triggered submarine landslide near the SW of Xiaoliuqiu	Terrestrial, Atmospheric and Oceanic Sciences	Not Applicable	water environment landslides	taiw_3	30 km SW of Hengchun	2006-12-26 12:26:21UTC	Taiwan
https://www.doi.org/10.1785/0220200009	784	2020	Williamson, Amy L.; Melgar, Diego; Xu, Xiaohua; Milliner, Christopher	The 2018 Palu Tsunami: Coeval Landslide and Coseismic Sources	Seismological Research Letters	Not Applicable	water environment landslides	indo_1	Palu	2018-09-28 10:02:45UTC	Indonesia
https://www.doi.org/10.2489/jswc.68.2.138	785	2013	Fusun, S.; Jinniu, W.; Tao, L.; Yan, W.; Haixia, G.; Ning, W.	Effects of different types of vegetation recovery on runoff and soil erosion on a Wenchuan earthquake-triggered landslide, China	Journal of Soil and Water Conservation	Not Applicable	Vegetation and EQILs	chin_1	Wenchuan-Sichuan	2008-05-12 06:28:01UTC	China
https://www.doi.org/10.1016/j.ecolind.2011.09.028	786	2012	Cheng, Song; Yang, Gang; Yu, Hui; Li, Jiyue; Zhang, Li	Impacts of Wenchuan Earthquake-induced landslides on soil physical properties and tree growth	Ecological Indicators	Not Applicable	Vegetation and EQILs	chin_1	Wenchuan-Sichuan	2008-05-12 06:28:01UTC	China
https://www.doi.org/10.1016/j.ecolmodel.2010.11.007	787	2011	Chuang, Chin-Wei; Lin, Chao-Yuan; Chien, Chang-Hai; Chou, Wen-Chieh	Application of Markov-chain model for vegetation restoration assessment at landslide areas caused by a catastrophic earthquake in Central Taiwan	Ecological Modelling	Not Applicable	Vegetation and EQILs	taiw_1	Chi Chi	1999-09-20 17:47:18UTC	Taiwan
https://www.doi.org/10.1016/j.ecolmodel.2003.12.037	788	2004	Lin, Chao-Yuan; Lo, Huang-Mu; Chou, Wen-Chieh; Lin, Wen-Tzu	Vegetation recovery assessment at the Jou-Jou Mountain landslide area caused by the 921 Earthquake in Central Taiwan	Ecological Modelling	Not Applicable	Vegetation and EQILs	taiw_1	Chi Chi	1999-09-20 17:47:18UTC	Taiwan
https://www.doi.org/10.1016/j.foreco.2005.02.026	789	2005	Lin, Wen-Tzu; Chou, Wen-Chieh; Lin, Chao-Yuan; Huang, Pi-Hui; Tsai, Jing-Shyan	Vegetation recovery monitoring and assessment at landslides caused by earthquake in Central Taiwan	Forest Ecology and Management	Not Applicable	Vegetation and EQILs	taiw_1	Chi Chi	1999-09-20 17:47:18UTC	Taiwan
https://www.doi.org/10.1016/j.ecoleng.2006.04.005	790	2006	Lin, Wen-Tzu; Lin, Chao-Yuan; Chou, Wen-Chieh	Assessment of vegetation recovery and soil erosion at landslides caused by a catastrophic earthquake: A case study in Central Taiwan	Ecological Engineering	Not Applicable	Vegetation and EQILs	taiw_1	Chi Chi	1999-09-20 17:47:18UTC	Taiwan
https://www.doi.org/10.1016/j.ecoleng.2008.04.002	791	2008	Lin, Wen-Tzu; Lin, Chao-Yuan; Tsai, Jing-Shyan; Huang, Pi-Hui	Eco-environmental changes assessment at the Chiufenershan landslide area caused by catastrophic earthquake in Central Taiwan	Ecological Engineering	Not Applicable	Vegetation and EQILs	taiw_1	Chi Chi	1999-09-20 17:47:18UTC	Taiwan
https://www.doi.org/10.1007/s10661-008-0312-8	792	2009	Chou, Wen-Chieh; Lin, Wen-Tzu; Lin, Chao-Yuan	Vegetation recovery patterns assessment at landslides caused by catastrophic earthquake: A case study in central Taiwan	Environmental Monitoring and Assessment	Not Applicable	Vegetation and EQILs	taiw_1	Chi Chi	1999-09-20 17:47:18UTC	Taiwan
https://www.doi.org/10.5194/nhess-10-623-2010	793	2010	Peduzzi, P.	Landslides and vegetation cover in the 2005 North Pakistan earthquake: a GIS and statistical quantitative approach	Natural Hazards and Earth System Sciences	Not Applicable	Vegetation and EQILs	pak_1	Kashmir	2005-10-08 03:50:40UTC	Pakistan
https://www.doi.org/10.1007/s11069-009-9421-0	794	2010	Lin, Chao-Yuan; Chuang, Chin-Wei; Lin, Wen-Tzu; Chou, Wen-Chieh	Vegetation recovery and landscape change assessment at Chiufenershan landslide area caused by Chichi earthquake in central Taiwan	Natural Hazards	Not Applicable	Vegetation and EQILs	taiw_1	Chi Chi	1999-09-20 17:47:18UTC	Taiwan
https://www.doi.org/10.1007/s11629-016-3807-8	795	2016	Yang, Qing-wei; Liu, Shou-jiang; Hu, Cui-hua; Lin, Ye-bin; Zhang, Bin; Luo, Ming-liang; Peng, Hui-ling	Ecological species groups and interspecific association of vegetation in natural recovery process at Xiejiadian landslide after 2008 Wenchuan earthquake	Journal of Mountain Science	Not Applicable	Vegetation and EQILs	chin_1	Wenchuan-Sichuan	2008-05-12 06:28:01UTC	China
https://www.doi.org/10.1007/s10346-017-0802-2	796	2017	Liang, T.; Knappett, J. A.; Bengough, A. G.; Ke, Y. X.	Small-scale modelling of plant root systems using 3D printing, with applications to investigate the role of vegetation on earthquake-induced landslides	Landslides	Not Applicable	Vegetation and EQILs	Not Applicable	Not Applicable	Not Applicable	Not Applicable
https://www.doi.org/10.1016/j.ecolind.2017.12.006	797	2018	Yang, Wentao; Qi, Wenwen; Zhou, Jinxing	Decreased post-seismic landslides linked to vegetation recovery after the 2008 Wenchuan earthquake	Ecological Indicators	Not Applicable	Vegetation and EQILs	chin_1	Wenchuan-Sichuan	2008-05-12 06:28:01UTC	China
https://www.doi.org/10.1002/2016GL068333	798	2016	Marc, Odin; Hovius, Niels; Meunier, Patrick	The mass balance of earthquakes and earthquake sequences	Geophysical Research Letters	Not Applicable	Landscape evolution	Not Applicable	Not Applicable	Not Applicable	Not Applicable
https://www.doi.org/10.5194/nhess-17-1159-2017	799	2017	Marc, Odin; Meunier, Patrick; Hovius, Niels	Prediction of the area affected by earthquake-induced landsliding based on seismological parameters	Natural Hazards and Earth System Sciences	regional landslide analysis	regional landslide comparison	Not Applicable	Not Applicable	Not Applicable	Not Applicable
https://www.doi.org/10.1016/j.enggeo.2010.09.017	800	2011	Jibson, Randall W.	Methods for assessing the stability of slopes during earthquakes—A retrospective	Engineering Geology	other		Not Applicable	Not Applicable	Not Applicable	Not Applicable
https://www.doi.org/10.1029/2007GL031337	801	2007	Meunier, Patrick; Hovius, Niels; Haines, John	Regional patterns of earthquake-triggered landslides and their relation to ground motion	Geophysical Research Letters	regional landslide analysis	regional landslide comparison	Not Applicable	Not Applicable	Not Applicable	Not Applicable
https://www.doi.org/10.1130/0091-7613(1997)025<0231:SFFAMB>2.3.CO;2	802	1997	Hovius, Niels; Stark, Colin P.; Allen; Philip A.	Sediment flux from a mountain belt derived by landslide mapping	Geology	Not Applicable	Landscape evolution	Not Applicable	Not Applicable	Not Applicable	Not Applicable
https://www.doi.org/10.1086/314387	803	2000	Hovius, Niels; Stark, Colin P.; Hao-Tsu, C.; Lin Jiun-Chuan, L.	Supply and Removal of Sediment in a Landslide-Dominated Mountain Belt:Central Range,Taiwan	The Journal of Geology	Not Applicable	Landscape evolution	Not Applicable	Not Applicable	Not Applicable	Not Applicable
https://www.doi.org/10.1029/2018RG000626	804	2019	Fan, X.; Scaringi, G.; Korup, O.; West, Joshua A.; van Westen, Cees J.; Tanyas, Hakan; Hovius, Niels; Hales, Tristram C.; Jibson, Randall W.; Allstadt, Kate E.; Zhang, Limin; Evans, Stephen G.; Xu, Chong; Li, Gen; Pei, Xiangjun; Xu, Qiang; Huang, Runqiu	Earthquake‐Induced Chains of Geologic Hazards: Patterns, Mechanisms, and Impacts	Reviews of Geophysics	other		Not Applicable	Not Applicable	Not Applicable	Not Applicable
https://doi.org/10.1016/j.enggeo.2019.105149	805	2019	Huayong, N.; Hua, G.; Yanchao, G.; Blumetti, A.M.; Comerci, V.; Di Manna, P.; Guerrieri, L.; Vittori; E.	Comparison of Earthquake Environmental Effects and ESI intensities for recent seismic events in different tectonic settings: Sichuan (SW China) and Central Apennines (Italy)	Engineering Geology	regional landslide analysis	regional landslide comparison	chin_1|chin_2|chin_8|ita_15|ita_4|ita_6	Wenchuan-Sichuan|Lushan|Jiuzhaigou County, Sichuan Province|Aquila|Amatrice|Norcia	2008-05-12 06:28:01UTC|2013-04-20 00:02:47UTC|2017-08-08 13:19:49UTC|2009-04-06 01:32:39UTC|2016-08-24 01:36:32UTC|2016-10-30 06:40:18UTC	China|China|China|Italy|Italy|Italy
https://doi.org/10.1144/gsjgs.153.1.0039	806	1996	Koukouvelas, I.; Mpresiakas, A.; Sokos, E.; Doutsos, T.	The tectonic setting and earthquake ground hazards of the 1993 Pyrgos earthquake, Peloponnese, Greece	Journal of the Geological Society of London	regional landslide analysis	regional mapping|regional susceptibility/hazard assessment	gre_4	M 5.4 - 10 km WSW of Epitálio, Greece	1993-03-26 11:58:15UTC	Greece
https://doi.org/10.1016/j.enggeo.2015.03.011	807	2015	Koukouvelas, I.; Litoseliti, A.; Nikolakopoulos, K.; Zygouri, V.	Earthquake triggered rock falls and their role in the development of a rock slope: The case of Skolis Mountain, Greece	Engineering Geology	regional landslide analysis	regional mapping|regional susceptibility/hazard assessment	gre_3	15 km ESE of Várda	2008-06-08 12:25:29UTC	Greece
https://doi.org/10.1007/s10064-017-1225-y	808	2019	Zygouri, V.; Koukouvelas, I.	Landslides and natural dams in the Krathis River, north Peloponnese, Greece	Bulletin of Engineering Geology and the Environment	Not Applicable	water environment landslides	Not Applicable	Not Applicable	Not Applicable	Not Applicable
https://doi.org/10.3390/ijgi9070457	809	2020	Litoseliti, A.; Koukouvelas, I.; Nikolakopoulos, K.; Zygouri, V.	An event-based inventory approach in landslide hazard assessment: the case of the Skolis Mountain, Northwest Peloponnese, Greece	ISPRS International Journal of Geo-Information	regional landslide analysis	regional mapping|regional susceptibility/hazard assessment|regional landslide descriptive statistics	gre_3	15 km ESE of Várda	2008-06-08 12:25:29UTC	Greece
https://doi.org/10.1016/j.geomorph.2020.107306	810	2020	Koukouvelas, I.; Nikolakopoulos, K.; Zygouri, V.; Kyriou, A.	Post-seismic monitoring of cliff mass wasting using an unmanned aerial vehicle and field data at Egremni, Lefkada Island, Greece	Geomorphology	regional landslide analysis	regional mapping|regional landslide descriptive statistics	gre_2	10km WSW of Nidri	2015-11-17 07:10:07UTC	Greece

## Sheet: Earthquake database
Earthquake ID	Earthquake name	Earthquake time	Earthquake country	Earthquake event type	Earthquake focal mechanism	Moment tensor solution (GMT_PSMECA_input)	Literature reference for focal mechanism	ML (Richter local magnitude)	Ms (Richter surface-wave magnitude)	Mw (moment magnitude)	MCS (Mercalli–Cancani–Sieberg magnitude)	Epicentre Latitude (Decimal degrees)	Epicentre Longitude (Decimal degrees)	Hypocenter depth (km)	Earthquake catalogue	Link earthquake
D1	D2	D3	D4	D5	D6	D7	D8	D9	D10	D11	D12	D13	D14	D15	D16
alg_1	M 5.2 - northern Algeria	2006-03-20 19:44:25UTC	Algeria	single	strike-slip-normal	5.32 36.62 12 0.07 -0.12 0.05 -1.22 -3.19 -6.41 23 X Y 200603201944A		unknown	unknown	5.2	7	36.623	5.328	10	ANSS Comprehensive Earthquake Catalog (ComCat)-USGS	https://earthquake.usgs.gov/earthquakes/eventpage/usp000ecjv/executive
bul_1	Serbia-Bulgaria-Macedonia border region	2012-05-22 00:00:32UTC	Bulgaria	single	normal	23.05 42.51 13 -2.85 2.11 0.74 -1.33 0.02 -1.49 24 X Y 201205220000A		unknown	5.3	5.6	7	42.645	22.968	10	ANSS Comprehensive Earthquake Catalog (ComCat)-USGS	https://earthquake.usgs.gov/earthquakes/eventpage/usp000jkrw/executive
can_1	Nahanni	1985-10-05 15:24:02UTC	Canada	single	reverse	-123.93 62.53 10 8.62 -1.86 -6.76 -0.14 -2.40 2.15 25 X Y 100585A		unknown	6.6	6.7	8	62.237	-124.266	10	ANSS Comprehensive Earthquake Catalog (ComCat)-USGS	https://earthquake.usgs.gov/earthquakes/eventpage/usp0002kgp/executive
can_2	Haida Gwaii	2012-10-28 03:04:08UTC	Canada	multiple	reverse	-132.06 52.61 12 4.08 -2.53 -1.56 3.26 -1.78 2.40 27 X Y 201210280304A		unknown	7.5	7.8	8	52.788	-132.101	14	ANSS Comprehensive Earthquake Catalog (ComCat)-USGS	https://earthquake.usgs.gov/earthquakes/eventpage/usp000juhz/executive
can_3	Vancouver Island	1946-06-23 17:13:19UTC	Canada	single	strike-slip		Rogers, G.C., Hasegawa, H.S., 1978. A second look at the British Columbia earthquake of June 23, 1946. Bull. of the Seismological Soc. of America 68, 653–676	unknown	7.3	unknown	7	49.76	-125.34	30	ANSS Comprehensive Earthquake Catalog (ComCat)-USGS	https://earthquake.usgs.gov/earthquakes/eventpage/ushis1554/executive
chil_1	Aysén Fjord (Patagonia)	2007-04-21 17:53:46UTC	Chile	single	strike-slip	-72.95 -45.48 12 -0.91 -0.12 1.03 0.19 0.28 2.77 25 X Y 200704211753A		unknown	6.3	6.2	6	-45.243	-72.648	36.7	ANSS Comprehensive Earthquake Catalog (ComCat)-USGS	https://earthquake.usgs.gov/earthquakes/eventpage/usp000fa97/executive
chil_2	Maule	2010-02-27 06:34:11UTC	Chile	multiple	reverse	-73.15 -35.98 23 1.04 -0.04 -1.00 0.30 -1.52 -0.12 29 X Y 201002270634A		unknown	8.5	8.8	8	-36.122	-72.898	22.9	ANSS Comprehensive Earthquake Catalog (ComCat)-USGS	https://earthquake.usgs.gov/earthquakes/eventpage/official20100227063411530_30/executive
chin_1	Wenchuan-Sichuan	2008-05-12 06:28:01UTC	China	multiple	reverse-strike-slip	104.10 31.44 13 0.57 0.01 -0.58 -0.20 0.56 -0.35 28 X Y 200805120628A		unknown	8.1	7.9	9	31.002	103.332	19	ANSS Comprehensive Earthquake Catalog (ComCat)-USGS	https://earthquake.usgs.gov/earthquakes/eventpage/usp000g650/executive
chin_2	Lushan	2013-04-20 00:02:47UTC	China	single	reverse	103.12 30.22 22 0.95 -0.11 -0.84 -0.04 0.16 -0.45 26 X Y 201304200002A		unknown	6.8	6.6	8	30.308	102.888	14	ANSS Comprehensive Earthquake Catalog (ComCat)-USGS	https://earthquake.usgs.gov/earthquakes/eventpage/usb000gcdd/executive
chin_3	Minxian-Zhangxian	2013-07-21 23:45:56UTC	China	single	strike-slip-reverse	104.31 34.60 17 0.61 0.44 -1.05 -0.47 0.02 0.69 25 X Y 201307212345A		unknown	6.2	5.9	7	34.512	104.262	8	ANSS Comprehensive Earthquake Catalog (ComCat)-USGS	https://earthquake.usgs.gov/earthquakes/eventpage/usb000ije3/executive
chin_4	Haiyuan	1920-12-16 12:05:55UTC	China	single	strike-slip		Ou, Q., Kulikova, G., Yu, J., Elliott, A., Parsons, B., Walker, R., 2020. Magnitude of the 1920 Haiyuan Earthquake Reestimated Using Seismological and Geomorphological Methods. JGR Solid Earth 125. https://doi.org/10.1029/2019JB019244	unknown	unknown	8.3	8	36.888	105.606	15	ANSS Comprehensive Earthquake Catalog (ComCat)-USGS	https://earthquake.usgs.gov/earthquakes/eventpage/iscgem912687/executive
chin_5	Wenping (Ludian county)	2014-08-03 08:30:13UTC	China	single	strike-slip	103.50 27.06 15 -0.02 1.31 -1.29 -0.06 -0.36 -1.64 25 X Y 201408030830A		unknown	6.3	6.2	7	27.189	103.606	12	ANSS Comprehensive Earthquake Catalog (ComCat)-USGS	https://earthquake.usgs.gov/earthquakes/eventpage/usb000rzmg/executive
chin_6	Yushu (southern Qinghai)	2010-04-13 23:49:38UTC	China	single	strike-slip-reverse	96.79 33.05 16 -0.38 2.24 -1.86 -1.05 0.19 1.10 26 X Y 201004132349A		unknown	7	6.9	9	33.165	96.548	17	ANSS Comprehensive Earthquake Catalog (ComCat)-USGS	https://earthquake.usgs.gov/earthquakes/eventpage/usp000hbbt/executive
chin_7	Moxi	1786-06-01	China	unknown	reverse		Dai, F.C., Lee, C.F., Deng, J.H., Tham, L.G., 2005. The 1786 earthquake-triggered landslide dam and subsequent dam-break flood on the Dadu River, southwestern China. Geomorphology 65, 205–221. https://doi.org/10.1016/j.geomorph.2004.08.011	unknown	7.75	unknown	9	29.88	102.02	20
chin_8	Jiuzhaigou County, Sichuan Province	2017-08-08 13:19:49UTC	China	single	strike-slip	103.89 33.21 16 -0.17 5.70 -5.52 0.76 1.56 -3.77 25 X Y 201708081319A		unknown	6.8	6.5	7	33.193	103.855	9	ANSS Comprehensive Earthquake Catalog (ComCat)-USGS	https://earthquake.usgs.gov/earthquakes/eventpage/us2000a5x1/executive
chin_9	Nyingchi	2017-11-18 00:32:01UTC	China	single	reverse		Zhao, B., Li, W., Wang, Y., Lu, J., Li, X., 2019. Landslides triggered by the Ms 6.9 Nyingchi earthquake, China (18 November 2017): analysis of the spatial distribution and occurrence factors. Landslides 16, 765–776. https://doi.org/10.1007/s10346-019-01146-2	unknown	unknown	5.1	unknown	29.931	94.884	10	ANSS Comprehensive Earthquake Catalog (ComCat)-USGS	https://earthquake.usgs.gov/earthquakes/eventpage/us2000bqtu/executive
chin_10	Xichang	1850-12-09	China	unknown	unknown			unknown	7.5	unknown	unknown	27.8	102.3	unknown	NOAA National Centers for Environmental Information	https://www.ngdc.noaa.gov/hazel/view/hazards/earthquake/event-more-info/1905
chin_11	Tongwei	1718-06-19	China	unknown	unknown			unknown	7.5	unknown	unknown	35	105.2	unknown	NOAA National Centers for Environmental Information	https://www.ngdc.noaa.gov/hazel/view/hazards/earthquake/event-more-info/1210
chin_12	M 7.8 - Southern Qinghai, China	2001-11-14 09:26:10UTC	China	single	strike-slip-normal	92.91 35.80 15 -0.58 1.65 -1.07 -0.82 3.09 4.78 27 X Y 111401B		unknown	8	7.8	9	35.946	90.541	10	ANSS Comprehensive Earthquake Catalog (ComCat)-USGS	https://earthquake.usgs.gov/earthquakes/eventpage/usp000asvm/executive
chin_13	Luhuo	1973-02-06 10:37:10UTC	China	single	strike-slip		Zhou, H.L., Allen, C.R., Kanamori, H., 1983. Rupture complexity of the 1970 Tonghai and 1973 Luhuo earthquakes, China, from p-wave inversion, and relationship to surface faulting. Bull. of the Seismological Soc. of America 73, 1585-1597	unknown	7.4	unknown	9	31.398	100.581	33	ANSS Comprehensive Earthquake Catalog (ComCat)-USGS	https://earthquake.usgs.gov/earthquakes/eventpage/usp00000dz/executive
cos_1	Bijagua	2016-07-03 02:16:13UTC	Costa Rica	single	strike-slip	-85.04 10.77 12 -0.22 -3.49 3.70 -0.28 -1.51 0.41 23 X Y 201607030216A		unknown	unknown	5.1	unknown	10.663	-85.032	7.4	ANSS Comprehensive Earthquake Catalog (ComCat)-USGS	https://earthquake.usgs.gov/earthquakes/eventpage/us10005zjh/executive
ecu_1	Colombia-Ecuador border region 1	1987-03-06 01:54:50UTC	Ecuador	single	reverse	-77.77 0.10 15 2.78 0.14 -2.93 -1.04 3.84 -0.18 25 X Y 030687A		unknown	6.1	6.4	7	0.048	-77.653	14.1	ANSS Comprehensive Earthquake Catalog (ComCat)-USGS	https://earthquake.usgs.gov/earthquakes/eventpage/usp000330t/executive
ecu_2	Colombia-Ecuador border region 2	1987-03-06 04:10:41UTC	Ecuador	single	reverse	-77.84 -0.06 15 5.03 -0.12 -4.91 0.26 3.85 -0.97 26 X Y 030687B		unknown	6.9	7.2	7	0.151	-77.821	10	ANSS Comprehensive Earthquake Catalog (ComCat)-USGS	https://earthquake.usgs.gov/earthquakes/eventpage/usp000330w/executive
ecu_3	M 7.8 - 27km SSE of Muisne, Ecuador	2016-04-16 23:58:36UTC	Ecuador	single	reverse	-80.25 -0.12 22 3.41 0.03 -3.44 1.22 -4.65 -0.64 27 X Y 201604162358A		unknown	7.5	7.8	9	0.382	-79.922	20.6	ANSS Comprehensive Earthquake Catalog (ComCat)-USGS	https://earthquake.usgs.gov/earthquakes/eventpage/us20005j32/executive
elsa_1	El salvador 2001_1	2001-01-13 17:33:32UTC	El Salvador	single	normal	-89.13 12.97 56 -4.24 2.92 1.32 1.20 -1.12 -2.01 27 X Y 011301C		unknown	7.8	7.7	8	13.049	-88.66	60	ANSS Comprehensive Earthquake Catalog (ComCat)-USGS	https://earthquake.usgs.gov/earthquakes/eventpage/usp000a7m5/executive
elsa_2	El salvador 2001_2	2001-02-13 14:22:05UTC	El Salvador	single	strike-slip	-88.97 13.98 15 -0.39 -1.61 2.00 -0.63 2.41 -7.50 25 X Y 021301B		unknown	6.5	6.6	8	13.671	-88.938	10	ANSS Comprehensive Earthquake Catalog (ComCat)-USGS	https://earthquake.usgs.gov/earthquakes/eventpage/usp000a9jv/executive
geo_1	Sak'art'velo (Racha region)	1991-04-29 09:12:48UTC	Georgia	single	reverse	43.61 42.60 22 3.49 -2.80 -0.69 0.89 0.70 0.33 26 X Y 042991B		unknown	7	7	8	42.453	43.673	17.2	ANSS Comprehensive Earthquake Catalog (ComCat)-USGS	https://earthquake.usgs.gov/earthquakes/eventpage/usp0004qza/executive
gre_1	Lefkada Ionian Islands (Greece-Albania border region)	2003-08-14 05:14:54UTC	Greece	single	strike-slip-normal	20.67 38.70 15 -0.24 1.52 -1.27 1.41 -0.66 2.12 25 X Y 081403B		unknown	6.2	6.3	8	39.16	20.605	10	ANSS Comprehensive Earthquake Catalog (ComCat)-USGS	https://earthquake.usgs.gov/earthquakes/eventpage/usp000c4tt/executive
gre_2	10km WSW of Nidri	2015-11-17 07:10:07UTC	Greece	single	strike-slip-reverse	20.53 38.47 15 0.10 4.51 -4.61 2.91 -1.12 4.54 25 X Y 201511170710A		6	6.5	6.5	7	38.67	20.6	11	ANSS Comprehensive Earthquake Catalog (ComCat)-USGS	https://earthquake.usgs.gov/earthquakes/eventpage/us10003ywp/executive
gre_3	15 km ESE of Várda	2008-06-08 12:25:29UTC	Greece	single	strike-slip	21.63 37.93 25 -0.29 3.87 -3.58 -1.39 -0.79 2.16 25 X Y 200806081225A		unknown	6.3	6.4	8	37.963	21.525	16	ANSS Comprehensive Earthquake Catalog (ComCat)-USGS	https://earthquake.usgs.gov/earthquakes/eventpage/usp000g8vs/executive
gre_4	M 5.4 - 10 km WSW of Epitálio, Greece	1993-03-26 11:58:15UTC	Greece	single	strike-slip-reverse	21.18 37.61 15 0.52 1.05 -1.57 0.09 0.80 0.57 24 X Y 032693D		4.8	5.2	5.4	7	37589	21391	10	ANSS Comprehensive Earthquake Catalog (ComCat)-USGS	https://earthquake.usgs.gov/earthquakes/eventpage/usp0005q5f/executive
gua_1	Guatemala	1976-02-04 09:01:43UTC	Guatemala	single	strike-slip	-89.78 15.14 16 -0.35 -0.78 1.12 0.38 -0.47 1.67 27 X Y 020476A		unknown	7.5	7.5	9	15.324	-89.101	5	ANSS Comprehensive Earthquake Catalog (ComCat)-USGS	https://earthquake.usgs.gov/earthquakes/eventpage/usp0000ex3/executive
hai_1	Haiti region	2010-01-12 21:53:10UTC	Haiti	multiple	strike-slip-reverse	-72.62 18.61 12 1.74 -3.87 2.13 -0.53 -1.06 2.74 26 X Y 201001122153A		unknown	7.3	7	9	18.433	-72.571	13	ANSS Comprehensive Earthquake Catalog (ComCat)-USGS	https://earthquake.usgs.gov/earthquakes/eventpage/usp000h60h/executive
ind_1	Chamoli	1999-03-28 19:05:11UTC	India	single	reverse	79.21 30.38 15 1.58 -1.83 0.25 6.84 -3.18 0.84 25 X Y 032899F		unknown	6.6	6.6	7	30.512	79.403	15	ANSS Comprehensive Earthquake Catalog (ComCat)-USGS	https://earthquake.usgs.gov/earthquakes/eventpage/usp00095cb/executive
ind_2	Sikkim	2011-09-18 12:40:51UTC	India	single	strike-slip	88.35 27.44 46 -0.41 -2.32 2.73 0.90 -0.12 -0.63 26 X Y 201109181240A		unknown	6.7	6.9	8	27.73	88.155	50	ANSS Comprehensive Earthquake Catalog (ComCat)-USGS	https://earthquake.usgs.gov/earthquakes/eventpage/usp000j88b/executive
ind_3	Assam	1897-06-12	India	unknown	reverse		England, P., Bilham, R., 2015. The Shillong Plateau and the great 1897 Assam earthquake. Tectonics 34, 1792–1812. https://doi.org/10.1002/2015TC003902	unknown	8.7	8	unknown	26	91	33	NOAA National Centers for Environmental Information	https://www.ngdc.noaa.gov/hazel/view/hazards/earthquake/event-more-info/2513
ind_4	Uttarkashi	1991-10-19 21:23:14UTC	India	single	reverse	78.24 30.22 15 0.68 -0.54 -0.14 1.49 -0.57 0.44 26 X Y 101991G		unknown	7	6.8	8	30.78	78.774	10.3	ANSS Comprehensive Earthquake Catalog (ComCat)-USGS	https://earthquake.usgs.gov/earthquakes/eventpage/usp0004y1r/executive
indo_1	Palu	2018-09-28 10:02:45UTC	Indonesia	multiple	strike-slip-normal	119.86 -0.72 12 -0.48 0.76 -0.27 -1.45 -0.87 -2.19 27 X Y 201809281002A		unknown	7.4	7.5	8	-0.256	119.846	20	ANSS Comprehensive Earthquake Catalog (ComCat)-USGS	https://earthquake.usgs.gov/earthquakes/eventpage/us1000h3p4/executive
indo_2	30 km WSW of Pariaman	2009-09-30 10:16:09UTC	Indonesia	single	reverse-strike-slip	99.67 -0.79 78 1.76 -0.76 -0.99 0.66 -0.99 -1.94 27 X Y 200909301016A		unknown	unknown	7.6	8	0.702	99.867	81	ANSS Comprehensive Earthquake Catalog (ComCat)-USGS	https://earthquake.usgs.gov/earthquakes/eventpage/usp000h237/executive
indo_3	Ambon	1674-02-17	Indonesia	unknown	unknown			unknown	6.8	unknown	unknown	-3.75	127.750	40	NOAA National Centers for Environmental Information	https://www.ngdc.noaa.gov/hazel/view/hazards/earthquake/event-more-info/5983
ira_1	29 km S of ?alabja	2017-11-12 18:18:17UTC	Iran	single	reverse	45.84 34.83 18 0.38 -0.08 -0.30 1.33 -0.77 0.27 27 X Y 201711121818A		unknown	7.3	7.3	9	34.911	45.959	19	ANSS Comprehensive Earthquake Catalog (ComCat)-USGS	https://earthquake.usgs.gov/earthquakes/eventpage/us2000bmcg/executive
ira_2	Rudbar–Manjil	1990-06-20 21:00:09UTC	Iran	single	strike-slip-reverse	49.52 36.95 15 2.42 6.99 -9.41 -8.73 -1.22 6.40 26 X Y 062090B		unknown	7.7	7.4	9	39.957	49.409	18.5	ANSS Comprehensive Earthquake Catalog (ComCat)-USGS	https://earthquake.usgs.gov/earthquakes/eventpage/usp0004arq/executive
ira_3	Ahar-Varzeghan	2012-08-11 12:23:18UTC	Iran	single	strike-slip	46.80 38.31 15 1.04 0.51 -1.55 0.88 -0.37 -5.85 25 X Y 201208111223A		unknown	6.7	6.4	7	38.329	46.826	11	ANSS Comprehensive Earthquake Catalog (ComCat)-USGS	https://earthquake.usgs.gov/earthquakes/eventpage/usp000jq5p/executive
ira_4	Ahar-Varzeghan_2	2012-08-11 12:34:35UTC	Iran	single	reverse-strike-slip	46.78 38.35 19 2.48 -1.07 -1.41 -1.78 0.44 -3.21 25 X Y 201208111234A		unknown	unknown	6.2	8	38.389	46.745	12	ANSS Comprehensive Earthquake Catalog (ComCat)-USGS	https://earthquake.usgs.gov/earthquakes/eventpage/usp000jq5r/executive
ira_5	Sarein	1997-02-28 12:57:18UTC	Iran	single	strike-slip-normal	48.06 38.30 15 -0.30 -0.29 0.59 1.01 0.26 -1.30 25 X Y 022897D		unknown	6.1	6.1	8	38.075	48.05	10	ANSS Comprehensive Earthquake Catalog (ComCat)-USGS	https://earthquake.usgs.gov/earthquakes/eventpage/usp0007y0b/executive
ira_6	59 km SSW of Abhar	2002-06-22 02:58:21UTC	Iran	single	reverse	48.97 35.82 15 5.90 -5.12 -0.78 3.78 -0.66 1.77 25 X Y 062202B		unknown	6.4	6.5	7	35.626	49.047	10	ANSS Comprehensive Earthquake Catalog (ComCat)-USGS	https://earthquake.usgs.gov/earthquakes/eventpage/usp000b6pk/executive
ita_1	Irpinia	1980-11-23 18:34:53UTC	Italy	single	normal	15.39 40.82 14 -2.47 1.47 1.00 0.48 -0.01 -1.11 26 X Y 112380A		6.5	6.9	unknown	9	40.914	15.366	10	ANSS Comprehensive Earthquake Catalog (ComCat)-USGS	https://earthquake.usgs.gov/earthquakes/eventpage/usp0001ay4/executive
ita_2	Friuli	1976-05-06 20:00:11UTC	Italy	single	reverse	13.17 46.33 15 3.36 -3.40 0.04 5.06 1.74 0.04 25 X Y 050676A		unknown	6.5	unknown	9	46.356	13.275	9	ANSS Comprehensive Earthquake Catalog (ComCat)-USGS	https://earthquake.usgs.gov/earthquakes/eventpage/usp0000g5v/executive
ita_3	Offshore Sicily	2002-09-06 01:21:28UTC	Italy	single	reverse-strike-slip	13.57 38.42 15 6.15 -5.73 -0.42 -3.62 2.76 -6.16 24 X Y 090602A		unknown	5.5	6	5	38.381	13.701	5	ANSS Comprehensive Earthquake Catalog (ComCat)-USGS	https://earthquake.usgs.gov/earthquakes/eventpage/usp000bbb2/executive
ita_4	Amatrice	2016-08-24 01:36:32UTC	Italy	single	normal	13.22 42.64 12 -2.40 0.53 1.86 0.02 -0.66 -0.99 25 X Y 201608240136A		unknown	6.1	6.2	7	42.723	13.188	4.4	ANSS Comprehensive Earthquake Catalog (ComCat)-USGS	https://earthquake.usgs.gov/earthquakes/eventpage/us10006g7d/executive
ita_5	Castelsantangelo sul nera	2016-10-26 19:18:08UTC	Italy	single	normal	13.11 42.88 12 -1.47 0.23 1.23 0.20 -0.54 -0.63 25 X Y 201610261918A		5.9	6	6.1	7	42.956	13.067	10	ANSS Comprehensive Earthquake Catalog (ComCat)-USGS	https://earthquake.usgs.gov/earthquakes/eventpage/us1000725y/executive
ita_6	Norcia	2016-10-30 06:40:18UTC	Italy	single	normal	13.16 42.75 12 -0.95 0.19 0.76 0.03 -0.28 -0.29 26 X Y 201610300640A		unknown	6.6	6.6	8	42.862	13.096	8	ANSS Comprehensive Earthquake Catalog (ComCat)-USGS	https://earthquake.usgs.gov/earthquakes/eventpage/us1000731j/executive
ita_7	Montereale	2017-01-18 10:25:25UTC	Italy	single	normal	13.29 42.45 13 -3.51 1.37 2.14 0.18 -1.22 -1.79 24 X Y 201701181025A		5.4	unknown	5.6	7	42.586	13.19	10	ANSS Comprehensive Earthquake Catalog (ComCat)-USGS	https://earthquake.usgs.gov/earthquakes/eventpage/us10007twn/executive
ita_8	4km NNE of Casamicciola Terme	2017-08-21 18:57:51UTC	Italy	single	unknown			unknown	4.2	unknown	5	40.783	13.939	2.7	ANSS Comprehensive Earthquake Catalog (ComCat)-USGS	https://earthquake.usgs.gov/earthquakes/eventpage/us2000aaae/executive
ita_9	Molise	2002-10-31 10:32:58UTC	Italy	single	strike-slip	14.87 41.68 15 0.47 -0.02 -0.45 0.82 -0.73 -4.46 24 X Y 103102B		unknown	5.6	5.9	7	41.789	14.872	10	ANSS Comprehensive Earthquake Catalog (ComCat)-USGS	https://earthquake.usgs.gov/earthquakes/eventpage/usp000bfqg/executive
ita_10	Irpinia 1930	1930-07-23 00:08:41UTC	Italy	single	normal		Emolo, A., Iannaccone, G., Zollo, A., Gorini, A. 2009. Inferences on the source mechanisms of the 1930 Irpinia (Southern Italy) earthquake from simulations of the kinematic rupture process. Annals of Geophysics 47, 6. https://doi.org/10.4401/ag-3372	unknown	unknown	6.4	7	40.922	15.377	15	ANSS Comprehensive Earthquake Catalog (ComCat)-USGS	https://earthquake.usgs.gov/earthquakes/eventpage/iscgem907513/executive
ita_11	Palata, Molise	2018-08-16 18:19:05UTC	Italy	single	strike-slip-reverse	14.88 41.83 15 -0.04 -0.35 0.39 0.45 -0.19 -0.98 24 X Y 201808161819A		unknown	unknown	5.3	7	41.875	14.808	11.6	ANSS Comprehensive Earthquake Catalog (ComCat)-USGS	https://earthquake.usgs.gov/earthquakes/eventpage/us1000gaq7/executive
ita_12	Umbria-Marche	1997-09-26 09:40:26UTC	Italy	single	normal	12.78 43.08 15 -1.07 0.43 0.64 0.18 -0.16 -0.61 25 X Y 092697C		6.4	6	6	8	43.084	12.812	10	ANSS Comprehensive Earthquake Catalog (ComCat)-USGS	https://earthquake.usgs.gov/earthquakes/eventpage/usp000881f/executive
ita_13	Terremoto delle Calabrie	1783-02-06	Italy	unknown	unknown			unknown	5.9	unknown	unknown	38.217	15.633	6	NOAA National Centers for Environmental Information	https://www.ngdc.noaa.gov/hazel/view/hazards/earthquake/event-more-info/1462
ita_14	4 km NNE of Massa Finalese	2012-05-20 02:03:52UTC	Italy	single	reverse	11.44 44.89 12 1.47 -1.39 -0.08 -0.53 0.77 0.37 25 X Y 201205200203A		unknown	unknown	6	6	44.89	11.23	6.3	ANSS Comprehensive Earthquake Catalog (ComCat)-USGS	https://earthquake.usgs.gov/earthquakes/eventpage/usp000jkn8/executive
ita_15	Aquila	2009-04-06 01:32:39UTC	Italy	single	normal	13.35 42.29 12 -3.30 1.43 1.87 -1.43 -0.27 -1.77 25 X Y 200904060132A		unknown	unknown	6.2	8	42.334	13.334	8.8	ANSS Comprehensive Earthquake Catalog (ComCat)-USGS	https://earthquake.usgs.gov/earthquakes/eventpage/usp000gvtu/executive
ita_16	offshore southern Apulia	1743-02-20	Italy	unknown	unknown			unknown	6.9	unknown	unknown	39	20.3	unknown	NOAA National Centers for Environmental Information	https://www.ngdc.noaa.gov/hazel/view/hazards/earthquake/event-more-info/7777
ita_17	eastern sicily-offshore	1693-01-09	Italy	unknown	unknown			unknown	6	unknown	unknown	37.333	15.167	unknown	NOAA National Centers for Environmental Information	https://www.ngdc.noaa.gov/hazel/view/hazards/earthquake/event-more-info/1129
ita_18	Messina strait	1908-12-28 04:20:26UTC	Italy	single	normal-strike-slip		Neri, G., Barberi, G., Oliva, G., Orecchio, B., 2004. Tectonic stress and seismogenic faulting in the area of the 1908 Messina earthquake, south Italy: Messina tectonic stress and faulting. Geophys. Res. Lett. 31, n/a-n/a. https://doi.org/10.1029/2004GL019742	unknown	unknown	7	7	38	15.349	15	ANSS Comprehensive Earthquake Catalog (ComCat)-USGS	https://earthquake.usgs.gov/earthquakes/eventpage/iscgem16958009/executive
ita_19	Matese	2013-12-29 17:08:43UTC	Italy	single	normal-strike-slip	14.51 41.33 13 -5.69 3.31 2.38 -1.74 -4.20 -3.15 23 X Y 201312291708A		4.9	unknown	5.1	7	41.369	14.445	10.5	ANSS Comprehensive Earthquake Catalog (ComCat)-USGS	https://earthquake.usgs.gov/earthquakes/eventpage/usc000ltr4/executive
jap_1	Niigata-Chuetsu	2004-10-23 08:56:00UTC	Japan	multiple	reverse	138.83 37.31 13 0.78 -0.15 -0.63 -0.22 -0.25 -0.36 26 X Y 102304D		unknown	6.3	6.6	8	37.226	138.779	16	ANSS Comprehensive Earthquake Catalog (ComCat)-USGS	https://earthquake.usgs.gov/earthquakes/eventpage/usp000d6vk/executive
jap_2	Kumamoto	2016-04-15 16:25:06UTC	Japan	multiple	strike-slip-normal	130.77 32.84 13 -1.66 5.06 -3.40 0.38 0.94 0.82 26 X Y 201604151625A		unknown	7.3	7	9	32.791	130.754	10	ANSS Comprehensive Earthquake Catalog (ComCat)-USGS	https://earthquake.usgs.gov/earthquakes/eventpage/us20005iis/executive
jap_3	Hyogo-ken Nanbu (Kobe)	1995-01-16 20:46:52UTC	Japan	single	strike-slip-reverse	134.99 34.78 20 0.61 1.90 -2.51 -0.69 -0.22 -0.57 26 X Y 011695D		unknown	6.8	6.9	9	34.583	135.018	21.9	ANSS Comprehensive Earthquake Catalog (ComCat)-USGS	https://earthquake.usgs.gov/earthquakes/eventpage/usp0006rew/executive
jap_4	Iwate–Miyagi Nairiku (eastern Honshu, Japan)	2008-06-13 23:43:45UTC	Japan	single	reverse	140.85 39.03 12 2.46 -0.10 -2.37 -0.16 -0.26 -0.88 26 X Y 200806132343A		unknown	7	6.9	8	39.03	140.881	7.8	ANSS Comprehensive Earthquake Catalog (ComCat)-USGS	https://earthquake.usgs.gov/earthquakes/eventpage/usp000g9h6/executive
jap_5	Eastern Honshu (Great Tohoku Earthquake)	2011-03-11 05:46:24UTC	Japan	multiple	reverse	143.05 37.52 20 1.73 -0.28 -1.45 2.12 4.55 -0.66 29 X Y 201103110546A		unknown	unknown	9.1	8	38.297	142.373	29	ANSS Comprehensive Earthquake Catalog (ComCat)-USGS	https://earthquake.usgs.gov/earthquakes/eventpage/official20110311054624120_30/executive
jap_6	Hokkaido Eastern Iburi	2018-09-05 18:07:59UTC	Japan	single	reverse	142.04 42.75 31 0.77 0.01 -0.78 -0.11 0.83 0.42 26 X Y 201809051807A		unknown	6.8	6.6	9	42.686	141.929	35	ANSS Comprehensive Earthquake Catalog (ComCat)-USGS	https://earthquake.usgs.gov/earthquakes/eventpage/us2000h8ty/executive
jap_7	Sanriku-Minami	2003-05-26 09:24:33UTC	Japan	single	reverse	141.57 38.94 61 2.06 0.49 -2.55 -0.75 -3.02 -0.21 26 X Y 052603A		unknown	unknown	7	7	38.849	141.568	68	ANSS Comprehensive Earthquake Catalog (ComCat)-USGS	https://earthquake.usgs.gov/earthquakes/eventpage/usp000by66/executive
jap_8	M 5.7 - 9km NNE of Oda	2018-04-08 16:32:31UTC	Japan	single	strike-slip	132.48 35.17 18 -0.15 4.28 -4.13 -0.23 -1.18 -2.05 24 X Y 201804081632A		unknown	unknown	5.7	7	35.259	132.553	10.3	ANSS Comprehensive Earthquake Catalog (ComCat)-USGS	https://earthquake.usgs.gov/earthquakes/eventpage/us2000dwh6/executive
jap_9	Hoei earthquake (M8.6)	1707-10-28	Japan	unknown	unknown			unknown	8.4	unknown	unknown	33.2	134.8	unknown	NOAA National Centers for Environmental Information	https://www.ngdc.noaa.gov/hazel/view/hazards/earthquake/event-more-info/1178
jap_10	13 km E of Arai	2011-03-11 18:59:16UTC	Japan	multiple	reverse-strike-slip	138.60 37.06 12 2.35 -1.43 -0.92 -2.03 -0.51 -1.96 25 X Y 201103111859A		unknown	6.1	6.2	7	37.014	138.376	9.3	ANSS Comprehensive Earthquake Catalog (ComCat)-USGS	https://earthquake.usgs.gov/earthquakes/eventpage/usp000hw18/executive
jap_11	20 km NNW of Kashiwazaki	2007-07-16 01:13:22UTC	Japan	single	reverse	138.47 37.50 12 0.92 -0.40 -0.53 -0.42 -0.36 -0.45 26 X Y 200707160113A		unknown	6.4	6.6	8	37.535	138.446	12	ANSS Comprehensive Earthquake Catalog (ComCat)-USGS	https://earthquake.usgs.gov/earthquakes/eventpage/usp000fg9t/executive
jap_12	168 km ENE of Hachinohe	1968-05-16 00:49:02UTC	Japan	multiple	reverse-strike-slip		Kanamori, H., 1971. Focal mechanism of the Tokachi-Oki earthquake of May 16, 1968: Contortion of the lithosphere at a junction of two trenches. Tectonophysics 12, 1–13. https://doi.org/10.1016/0040-1951(71)90063-1	unknown	unknown	8.2	8	40.86	143.435	29.9	ANSS Comprehensive Earthquake Catalog (ComCat)-USGS	https://earthquake.usgs.gov/earthquakes/eventpage/iscgem821946/executive
jap_13	Keichou-Fushimi	1596	Japan	unknown	unknown		Lin, A., Maruyama, T., Miyata, T., 1998. Paleoseismic events and the 1596 Keicho‐Fushimi large earthquake produced by a slip on the Gosukebashi fault at the eastern Rokko Mountains, Japan. Island Arc 7, 621–636. https://doi.org/10.1046/j.1440-1738.1998.00214.x	unknown	7	unknown	unknown	34.78	135.26	unknown
jap_14	7 km NW of Matsushima	2003-07-25 22:13:29UTC	Japan	single	reverse	141.10 38.52 15 1.53 -0.16 -1.37 -0.04 0.13 -0.16 25 X Y 072503I		unknown	5.8	6.1	8	38.415	140.996	6	ANSS Comprehensive Earthquake Catalog (ComCat)-USGS	https://earthquake.usgs.gov/earthquakes/eventpage/usp000c3bu/executive
jap_15	Totomi-Jishin	714	Japan	unknown	unknown		Goto, A.S., Muramatsu, T., Teraoka, Y., 2010. Timing of the Landslide-Dammed Lake Triggered by Earthquake, at Toyama River, Central Japan. Radiocarbon 52, 1090–1097. https://doi.org/10.1017/S0033822200046178	unknown	unknown	unknown	unknown	35.7	137.9	unknown
jap_16	Hietsu earthquake	1858-04-09	Japan	unknown	unknown		Inoue, K., Mizuyama, T., Sakatani, Y., 2010. The Catastrophic Tombi Landslide and Accompanying Landslide Dams Induced by the 1858 Hietsu Earthquake. J. Disaster Res. 5, 245–256. https://doi.org/10.20965/jdr.2010.p0245	unknown	7.45	unknown	unknown	36	137.5	unknown	NOAA National Centers for Environmental Information	https://www.ngdc.noaa.gov/hazel/view/hazards/earthquake/event-more-info/2020
kyr_1	60 km ENE of Toktogul	1992-08-19 02:04:37UTC	Kyrgyzstan	single	reverse	73.32 42.19 17 6.73 -6.33 -0.40 3.81 -0.56 -1.23 26 X Y 081992B		unknown	7.4	7.7	9	42.142	75.575	27.4	ANSS Comprehensive Earthquake Catalog (ComCat)-USGS	https://earthquake.usgs.gov/earthquakes/eventpage/usp0005cq0/executive
kyr_2	Kemin	1911-01-03 23:25:48UTC	Kyrgyzstan	single	reverse-strike-slip		Kulikova, G., Krüger, F., 2015. Source process of the 1911 M8.0 Chon-Kemin earthquake: investigation results by analogue seismic records. Geophysical Journal International 201, 1891–1911. https://doi.org/10.1093/gji/ggv091	unknown	unknown	7.7	8	43.013	78.53	20	ANSS Comprehensive Earthquake Catalog (ComCat)-USGS	https://earthquake.usgs.gov/earthquakes/eventpage/iscgem16958130/executive
kor_1	7 km SW of Heunghae	2017-11-15 05:29:32UTC	Korea	single	reverse-strike-slip	129.21 36.13 12 1.12 1.08 -2.21 -0.62 -0.82 -0.62 24 X Y 201711150529A		unknown	5.2	5.5	7	36.074	129.28	10	ANSS Comprehensive Earthquake Catalog (ComCat)-USGS	https://earthquake.usgs.gov/earthquakes/eventpage/us2000bnrs/executive
mex_1	Acambay	1912-11-19	Mexico	unknown	normal		Rodríguez-Pascua, M.A., Pérez-López, R., Garduño-Monroy, V.H., Perucha, M.A., Israde-Alcántara, I., 2017. Estimation of the epicentral area of the 1912 Acambay earthquake (M 6.9, Mexico) determined from the earthquake archaeological effects (EAE) and the ESI07 macroseismic scale. Quaternary International 451, 74–86. https://doi.org/10.1016/j.quaint.2017.06.045	unknown	unknown	6.9	unknown	19.9	-99.8	unknown	NOAA National Centers for Environmental Information	https://www.ngdc.noaa.gov/hazel/view/hazards/earthquake/event-more-info/2966
mex_2	16 km SSW of Cuyutlán	2003-01-22 02:06:34UTC	Mexico	single	reverse	-103.90 18.86 26 0.79 -0.62 -0.18 1.81 -0.54 0.34 27 X Y 012203A		unknown	7.6	7.6	7	18.77	-104.104	24	ANSS Comprehensive Earthquake Catalog (ComCat)-USGS	https://earthquake.usgs.gov/earthquakes/eventpage/usp000bnyr/executive
nep_1	Gorkha	2015-04-25 06:11:25UTC	Nepal	multiple	reverse	85.33 27.91 12 1.76 -1.82 0.06 8.04 -1.51 0.48 27 X Y 201504250611A		unknown	7.9	7.8	9	28.231	84.731	8.2	ANSS Comprehensive Earthquake Catalog (ComCat)-USGS	https://earthquake.usgs.gov/earthquakes/eventpage/us20002926/executive
nep_2	Gorkha_2	2015-05-12 07:05:19UTC	Nepal	multiple	reverse	86.08 27.67 12 2.70 -2.62 -0.08 8.25 -1.28 1.22 26 X Y 201505120705A		unknown	7.6	7.3	7	27.809	86.066	15	ANSS Comprehensive Earthquake Catalog (ComCat)-USGS	https://earthquake.usgs.gov/earthquakes/eventpage/us20002ejl/executive
neth_1	1 km W of Kessenich, Belgium	1992-04-13 01:20:00UTC	The Netherlands	single	normal	5.63 51.56 15 -8.79 3.71 5.07 -5.57 7.65 -5.33 23 X Y 041392A		5.9	5.2	5.4	7	51.153	5.798	21.2	ANSS Comprehensive Earthquake Catalog (ComCat)-USGS	https://earthquake.usgs.gov/earthquakes/eventpage/usp00055q3/executive
nze_1	Kaikōura	2016-11-14 00:34:22UTC	New Zealand	multiple	strike-slip	173.07 -42.44 12 -0.14 3.29 -3.15 -0.42 -0.07 -3.45 25 X Y 201611140034A		unknown	6.5	6.5	7	-42.606	173.254	9	ANSS Comprehensive Earthquake Catalog (ComCat)-USGS	https://earthquake.usgs.gov/earthquakes/eventpage/us100077hw/executive
nze_2	Christchurch	2011-02-21 23:51:42UTC	New Zealand	single	strike-slip-reverse	172.52 -43.60 12 1.09 0.60 -1.70 0.31 -0.27 -1.20 25 X Y 201102212351A		unknown	6.3	6.1	9	-43.583	172.68	5.9	ANSS Comprehensive Earthquake Catalog (ComCat)-USGS	https://earthquake.usgs.gov/earthquakes/eventpage/usp000huvq/executive
nze_3	Arthurs Pass	1994-06-18 03:25:15UTC	New Zealand	single	strike-slip-reverse	171.47 -42.94 15 0.71 0.27 -0.98 0.39 -0.26 -1.09 26 X Y 061894B		unknown	7.1	6.8	7	-42.963	171.658	13.6	ANSS Comprehensive Earthquake Catalog (ComCat)-USGS	https://earthquake.usgs.gov/earthquakes/eventpage/usp0006efu/executive
nze_4	Wilberforce	2015-01-05 17:48:42UTC	New Zealand	single	strike-slip	171.18 -42.98 12 -0.25 0.69 -0.44 -0.96 0.12 -2.70 24 X Y 201501051748A		unknown	5.4	5.6	7	-43.055	171.236	8.1	ANSS Comprehensive Earthquake Catalog (ComCat)-USGS	https://earthquake.usgs.gov/earthquakes/eventpage/usc000tbve/executive
nze_5	Buller	1929-06-16 22:47:30UTC	New Zealand	single	reverse		Parker, R.N., Hancox, G.T., Petley, D.N., Massey, C.I., Densmore, A.L., Rosser, N.J., 2015. Spatial distributions of earthquake-induced landslides and hillslope preconditioning in the northwest South Island, New Zealand. Earth Surf. Dynam. 3, 501–525. https://doi.org/10.5194/esurf-3-501-2015	unknown	unknown	7.3	7	-41.982	172.397	20	ANSS Comprehensive Earthquake Catalog (ComCat)-USGS	https://earthquake.usgs.gov/earthquakes/eventpage/iscgem908150/executive
nze_6	Inangahua	1968-05-23 17:24:18UTC	New Zealand	single	reverse		Parker, R.N., Hancox, G.T., Petley, D.N., Massey, C.I., Densmore, A.L., Rosser, N.J., 2015. Spatial distributions of earthquake-induced landslides and hillslope preconditioning in the northwest South Island, New Zealand. Earth Surf. Dynam. 3, 501–525. https://doi.org/10.5194/esurf-3-501-2015	unknown	unknown	7.2	9	-41.659	172.02	20	ANSS Comprehensive Earthquake Catalog (ComCat)-USGS	https://earthquake.usgs.gov/earthquakes/eventpage/iscgem822588/executive
pak_1	Kashmir	2005-10-08 03:50:40UTC	Pakistan	multiple	reverse-strike-slip	73.47 34.38 12 2.61 -1.27 -1.33 1.43 0.36 1.26 27 X Y 200510080350A		unknown	7.7	7.6	9	34.539	73.588	26	ANSS Comprehensive Earthquake Catalog (ComCat)-USGS	https://earthquake.usgs.gov/earthquakes/eventpage/usp000e12e/executive
png_1	Ramu-Markham Valley	1993-10-13 02:06:00UTC	Papua New Guinea	multiple	reverse	146.11 -6.04 15 0.60 -0.51 -0.09 2.27 -0.82 0.34 26 X Y 101393C		unknown	7	6.9	7	-5.889	146.02	25.3	ANSS Comprehensive Earthquake Catalog (ComCat)-USGS	https://earthquake.usgs.gov/earthquakes/eventpage/usp00061w1/executive
png_2	50 km WNW of Aitape	1998-07-17 08:49:13UTC	Papua New Guinea	single	reverse	142.07 -2.50 15 1.95 -1.15 -0.80 -3.05 0.62 0.97 26 X Y 071798D		unknown	7.1	7	7	-2.961	141.926	10	ANSS Comprehensive Earthquake Catalog (ComCat)-USGS	https://earthquake.usgs.gov/earthquakes/eventpage/usp0008rpa/executive
per_1	10 km SSW of Maca	2016-02-20 02:05:50UTC	Peru	single	strike-slip-normal	-71.70 -15.80 20 -2.13 4.98 -2.85 -1.63 2.53 -1.18 23 X Y 201602200205A		5.5	unknown	unknown	5	-15.72	-71.82	10	ANSS Comprehensive Earthquake Catalog (ComCat)-USGS	https://earthquake.usgs.gov/earthquakes/eventpage/us10004r90/executive
per_2	39km N of Lluta	2016-08-15 02:59:00UTC	Peru	single	strike-slip	-71.67 -15.68 22 -0.60 2.66 -2.06 -0.18 0.51 0.42 24 X Y 201608150258A		5.3	5.1	5.5	6	-15.654	-72.009	20	ANSS Comprehensive Earthquake Catalog (ComCat)-USGS	https://earthquake.usgs.gov/earthquakes/eventpage/us10006du3/executive
per_3	41 km SW of San Vicente de Cañete	2007-08-15 23:40:57UTC	Peru	multiple	reverse	-77.04 -13.73 34 0.85 -0.13 -0.72 -0.02 -0.72 0.34 28 X Y 200708152340A		unknown	7.9	8	8	-13.386	-76.603	39	ANSS Comprehensive Earthquake Catalog (ComCat)-USGS	https://earthquake.usgs.gov/earthquakes/eventpage/usp000fjta/executive
per_4	3 km ESE of Maca	2013-07-17 02:37:43UTC	Peru	single	normal	-71.83 -15.73 12 -1.10 1.14 -0.04 -0.13 0.02 -0.41 25 X Y 201307170237A		unknown	5.8	6	8	-15.657	-71.74	7	ANSS Comprehensive Earthquake Catalog (ComCat)-USGS	https://earthquake.usgs.gov/earthquakes/eventpage/usb000ifva/executive
phi_1	M 4.3 - Leyte	2006-02-17 02:36:32UTC	Philippines	single	unknown			unknown	2.7	unknown	unknown	10.366	125.085	35	ANSS Comprehensive Earthquake Catalog (ComCat)-USGS	https://earthquake.usgs.gov/earthquakes/eventpage/usp000ea6x/executive
phi_2	Baguio City	1990-07-16 07:26:34UTC	Philippines	multiple	strike-slip	121.23 15.97 15 -0.28 3.40 -3.12 -0.27 0.20 -2.41 27 X Y 071690A		unknown	7.8	7.7	9	15.679	121.172	25.1	ANSS Comprehensive Earthquake Catalog (ComCat)-USGS	https://earthquake.usgs.gov/earthquakes/eventpage/usp0004bxs/executive
por_1	Azores Islands	2005-09-20 13:29:56UTC	Portugal	single	unknown			unknown	unknown	4.5	unknown	37.682	25.3	10	ANSS Comprehensive Earthquake Catalog (ComCat)-USGS	https://earthquake.usgs.gov/earthquakes/eventpage/usp000dztd/executive
por_2	Lisboa	1755-11-01	Portugal	unknown	unknown			unknown	unknown	8.5	unknown	37	-10	unknown	NOAA National Centers for Environmental Information	https://www.ngdc.noaa.gov/hazel/view/hazards/earthquake/event-more-info/1339
rmac_1	0 km NE of Krušopek	1963-07-26 04:17:17UTC	Republic of Macedonia	single	strike-slip		Suhadolc, P., Sandron, D., Fitzko, F., Costa, G., 2004. Seismic ground motion estimates for the M6.1 earthquake of July 26, 1963 at Skopje, Republic of Macedonia. Acta Geodaetica et Geophysica Hungarica 39, 319–326. https://doi.org/10.1556/AGeod.39.2004.2-3.13	unknown	unknown	6	8	41.998	21.345	15	ANSS Comprehensive Earthquake Catalog (ComCat)-USGS	https://earthquake.usgs.gov/earthquakes/eventpage/iscgem872813/executive
rus_1	Tatar Strait	2007-08-02 02:37:42UTC	Russia	single	reverse	141.82 46.84 12 2.31 0.04 -2.35 -0.04 -0.24 -0.15 25 X Y 200708020237A		unknown	unknown	6.2	8	47.116	141.798	5	ANSS Comprehensive Earthquake Catalog (ComCat)-USGS	https://earthquake.usgs.gov/earthquakes/eventpage/usp000fhn0/executive
rus_2	Chuya	2003-09-27 11:33:25UTC	Russia	multiple	strike-slip-reverse	87.86 50.02 15 0.22 -0.94 0.73 0.02 -0.39 -0.01 27 X Y 092703F		unknown	7.5	7.3	7	50.038	87.813	16	ANSS Comprehensive Earthquake Catalog (ComCat)-USGS	https://earthquake.usgs.gov/earthquakes/eventpage/usp000c8sz/executive
spa_1	Murcia	2011-05-11 16:47:25UTC	Spain	single	reverse-strike-slip	-1.65 37.70 12 3.43 -6.19 2.76 1.71 -0.73 -0.87 23 X Y 201105111647A		unknown	unknown	5.1	8	37.699	-1.672	1	ANSS Comprehensive Earthquake Catalog (ComCat)-USGS	https://earthquake.usgs.gov/earthquakes/eventpage/usp000j1en/executive
spa_2	Arenas del Rey	1884-12-25	Spain	unknown	unknown		Rodríguez-Peces, M.J., García-Mayordomo, J., Azañón, J.M., Insua Arévalo, J.M., Pintor, J.J., 2011. Constraining pre-instrumental earthquake parameters from slope stability back-analysis: Palaeoseismic reconstruction of the Güevéjar landslide during the 1st November 1755 Lisbon and 25th December 1884 Arenas del Rey earthquakes. Quaternary International 242, 76–89. https://doi.org/10.1016/j.quaint…	unknown	unknown	6.5	unknown	36.95	-3.983	unknown	NOAA National Centers for Environmental Information	https://www.ngdc.noaa.gov/hazel/view/hazards/earthquake/event-more-info/2341
spa_3	Ossa de Montiel	2015-02-23 16:16:29UTC	Spain	single	normal			unknown	unknown	4.5	6	39.057	2.673	7.6	ANSS Comprehensive Earthquake Catalog (ComCat)-USGS	https://earthquake.usgs.gov/earthquakes/eventpage/usc000tsgt/executive
spa_4	Bullas	2002-08-06 06:16:18UTC	Spain	single	strike-slip-normal		Buforn, E., Cesca, S., Goded, T., Fresno, C. del, Muñoz, D., 2006. The Bullas (Murcia, SE Spain) earthquake, 29 January 2005. J Seismol 10, 65–72. https://doi.org/10.1007/s10950-006-2536-9	4.8	unknown	unknown	unknown	37.98	-1.891	10	ANSS Comprehensive Earthquake Catalog (ComCat)-USGS	https://earthquake.usgs.gov/earthquakes/eventpage/usp000b9d8/executive
spa_5	La Paca	2005-01-29 07:41:31UTC	Spain	single	strike-slip		Buforn, E., Cesca, S., Goded, T., Fresno, C. del, Muñoz, D., 2006. The Bullas (Murcia, SE Spain) earthquake, 29 January 2005. J Seismol 10, 65–72. https://doi.org/10.1007/s10950-006-2536-9	4.8	unknown	unknown	unknown	37.91	-1.82	5	ANSS Comprehensive Earthquake Catalog (ComCat)-USGS	https://earthquake.usgs.gov/earthquakes/eventpage/usp000df32/executive
taiw_1	Chi Chi	1999-09-20 17:47:18UTC	Taiwan	multiple	reverse	120.80 24.15 21 2.67 -0.93 -1.74 -1.06 -1.92 -1.06 27 X Y 092099D		unknown	7.7	7.7	9	23.772	120.982	33	ANSS Comprehensive Earthquake Catalog (ComCat)-USGS	https://earthquake.usgs.gov/earthquakes/eventpage/usp0009eq0/executive
taiw_2	M 6.4 - 25km SE of Yujing, Taiwan	2016-02-05 19:57:27UTC	Taiwan	single	reverse	120.43 22.94 17 1.25 -0.48 -0.77 0.74 -4.65 2.07 25 X Y 201602051957A		6.4	6.4	6.4	7	22.938	120.601	23	ANSS Comprehensive Earthquake Catalog (ComCat)-USGS	https://earthquake.usgs.gov/earthquakes/eventpage/us20004y6h/executive
taiw_3	30 km SW of Hengchun	2006-12-26 12:26:21UTC	Taiwan	single	normal	120.52 21.81 20 -3.16 0.42 2.74 1.23 -1.55 -1.23 26 X Y 200612261226A		unknown	7.3	7.1	7	21.799	120.547	10	ANSS Comprehensive Earthquake Catalog (ComCat)-USGS	https://earthquake.usgs.gov/earthquakes/eventpage/usp000f114/executive
taiw_4	26 km W of Hengchun	2006-12-26 12:34:13UTC	Taiwan	single	strike-slip-normal	120.40 22.02 33 -0.38 2.21 -1.83 2.11 0.14 -0.81 26 X Y 200612261234A		unknown	7.1	6.9	7	21.974	120.493	10	ANSS Comprehensive Earthquake Catalog (ComCat)-USGS	https://earthquake.usgs.gov/earthquakes/eventpage/usp000f115/executive
taj_1	Khait	1949-07-10 03:53:41UTC	Tajikistan	single	strike-slip		Metzger, S., Ischuk, A., Deng, Z., Ratschbacher, L., Perry, M., Kufner, S., Bendick, R., Moreno, M., 2020. Dense GNSS Profiles Across the Northwestern Tip of the India‐Asia Collision Zone: Triggered Slip and Westward Flow of the Peter the First Range, Pamir, Into the Tajik Depression. Tectonics 39. https://doi.org/10.1029/2019TC005797	unknown	unknown	7.5	7	39.174	70.891	20	ANSS Comprehensive Earthquake Catalog (ComCat)-USGS	https://earthquake.usgs.gov/earthquakes/eventpage/iscgem896645/executive
turk_1	Kocaeli	1999-08-17 00:01:39UTC	Turkey	single	strike-slip	29.97 41.01 17 -0.14 -0.06 0.20 0.82 -0.24 -2.75 27 X Y 081799A		unknown	7.8	7.6	9	40.748	29.864	17	ANSS Comprehensive Earthquake Catalog (ComCat)-USGS	https://earthquake.usgs.gov/earthquakes/eventpage/usp0009d4z/executive
usa_1	Anchorage	2018-11-30 17:29:29UTC	USA	single	normal	-150.02 61.49 48 -3.58 -0.40 3.98 0.46 2.86 0.64 26 X Y 201811301729A		unknown	unknown	7.1	8	61.346	-149.955	46.7	ANSS Comprehensive Earthquake Catalog (ComCat)-USGS	https://earthquake.usgs.gov/earthquakes/eventpage/ak018fcnsk91/executive
usa_2	Alaska	1964-03-28 03:36:16UTC	USA	multiple	reverse		West, M.E., Haeussler, P.J., Ruppert, N.A., Freymueller, J.T., Alaska Seismic Hazards Safety Commission, 2014. Why the 1964 Great Alaska Earthquake Matters 50 Years Later. Seismological Research Letters 85, 245–251. https://doi.org/10.1785/0220140020	unknown	unknown	9.2	8	60.908	-147.339	25	ANSS Comprehensive Earthquake Catalog (ComCat)-USGS	https://earthquake.usgs.gov/earthquakes/eventpage/official19640328033616_30/executive
usa_3	Ridgecrest, California	2019-07-06 03:19:53UTC	USA	single	strike-slip	-117.58 35.78 12 -0.23 -4.11 4.34 0.51 0.49 0.95 26 X Y 201907060319A		unknown	unknown	7.1	9	35.77	-117.599	8	ANSS Comprehensive Earthquake Catalog (ComCat)-USGS	https://earthquake.usgs.gov/earthquakes/eventpage/ci38457511/executive
usa_4	Northridge	1994-01-17 12:30:55UTC	USA	single	reverse	-118.64 34.44 17 1.08 -0.94 -0.14 0.05 -0.40 0.44 26 X Y 011794B		6.43	6.8	6.7	9	34.213	-118.537	18.2	ANSS Comprehensive Earthquake Catalog (ComCat)-USGS	https://earthquake.usgs.gov/earthquakes/eventpage/ci3144585/executive
usa_5	Denali fault	2002-11-03 22:12:41UTC	USA	multiple	strike-slip	-144.89 63.23 15 0.51 -6.04 5.53 0.18 2.62 -3.94 27 X Y 110302J		unknown	unknown	7.9	9	63.514	-147.453	4.2	ANSS Comprehensive Earthquake Catalog (ComCat)-USGS	https://earthquake.usgs.gov/earthquakes/eventpage/ak002e435qpj/executive
usa_6	Coalinga, California (Central California)	1983-05-02 23:42:38UTC	USA	single	reverse	-120.66 36.42 14 3.55 -1.39 -2.16 1.17 -1.66 1.58 25 X Y 050283A		6.7	unknown	unknown	8	36.232	-120.312	9.6	ANSS Comprehensive Earthquake Catalog (ComCat)-USGS	https://earthquake.usgs.gov/earthquakes/eventpage/nc1091100/executive
usa_7	Loma Prieta, California Earthquake	1989-10-18 00:04:15UTC	USA	single	reverse-strike-slip	-121.63 37.06 19 1.28 -2.52 1.23 1.24 -1.04 0.11 26 X Y 101889A		unknown	unknown	6.9	9	37.036	-121.88	17.2	ANSS Comprehensive Earthquake Catalog (ComCat)-USGS	https://earthquake.usgs.gov/earthquakes/eventpage/nc216859/executive
usa_8	Kiholo Bay (Hawaii region, Hawaii)	2006-10-15 17:07:49UTC	USA	single	normal-strike-slip	-155.94 19.83 48 -0.82 0.87 -0.05 0.06 -0.82 -0.85 26 X Y 200610151707A		unknown	unknown	unknown	9	19.877	-155.935	38.2	ANSS Comprehensive Earthquake Catalog (ComCat)-USGS	https://earthquake.usgs.gov/earthquakes/eventpage/hv5532127/executive
usa_9	New Madrid 1	1811-12-16	USA	unknown	unknown			unknown	8.5	7.5	unknown	35.6	-90.4	unknown	NOAA National Centers for Environmental Information	https://www.ngdc.noaa.gov/hazel/view/hazards/earthquake/event-more-info/1594
usa_10	New Madrid 2	1812-01-23	USA	unknown	unknown			unknown	8.4	7.3	unknown	36.3	-89.6	unknown	NOAA National Centers for Environmental Information	https://www.ngdc.noaa.gov/hazel/view/hazards/earthquake/event-more-info/1597
usa_11	New Madrid 3	1812-02-07	USA	unknown	unknown			unknown	8.8	7.5	unknown	36.5	-89.6	unknown	NOAA National Centers for Environmental Information	https://www.ngdc.noaa.gov/hazel/view/hazards/earthquake/event-more-info/1598
usa_12	The 1959 Hebgen Lake Earthquake, Montana	1959-08-18 06:37:13UTC	USA	single	normal-strike-slip		Doser, D.I., 1985. Source parameters and faulting processes of the 1959 Hebgen Lake, Montana, earthquake sequence. J. Geophys. Res. 90, 4537–4555. https://doi.org/10.1029/JB090iB06p04537	7.7	unknown	7.3	9	44.712	-111.215	5	ANSS Comprehensive Earthquake Catalog (ComCat)-USGS	https://earthquake.usgs.gov/earthquakes/eventpage/ushis2396/executive
usa_13	Lake Chelan, Washington	1872-12-15 05:40:00UTC	USA	unknown	unknown			unknown	unknown	6.8	unknown	47.9	-120.3	unknown	ANSS Comprehensive Earthquake Catalog (ComCat)-USGS	https://earthquake.usgs.gov/earthquakes/eventpage/ushis18721215054000000/executive
usa_14	Whittier Narrows	1987-10-01 14:42:20UTC	USA	single	reverse	-118.25 33.99 15 7.00 -8.08 1.08 3.88 0.86 -0.75 24 X Y 100187C		unknown	unknown	5.9	8	34.061	-118.079	14.6	ANSS Comprehensive Earthquake Catalog (ComCat)-USGS	https://earthquake.usgs.gov/earthquakes/eventpage/ci731691/executive
usa_15	Superstition Hills	1987-11-24 13:15:56UTC	USA	single	strike-slip	-116.00 33.02 15 0.54 -7.28 6.74 -0.94 -1.10 -0.38 25 X Y 112487G		6.1	unknown	6.6	8	33.015	-115.852	11.2	ANSS Comprehensive Earthquake Catalog (ComCat)-USGS	https://earthquake.usgs.gov/earthquakes/eventpage/ci628016/executive
usa_16	Mineral	2011-08-23 17:51:04UTC	USA	single	reverse	-77.93 37.91 12 4.71 0.04 -4.74 0.40 -0.81 -1.23 24 X Y 201108231751A		unknown	unknown	5.8	8	37.91	-77.936	6	ANSS Comprehensive Earthquake Catalog (ComCat)-USGS	https://earthquake.usgs.gov/earthquakes/eventpage/se609212/executive
