# Supplementary material for: A web-based GIS (web-GIS) database of the scientific articles on earthquake-triggered landslides
Source: Copernicus journal article supplement (doi:10.5194/nhess-23-1789-2023), 2023-05-12
Supplement: Supplementary file 1 [file nhess-23-1789-2023-supplement.zip]

Archive with 2 entries (2 files):
- article database.xlsx
- nhess-23-1789-2023-supplement-title-page.pdf
