# Supplementary material for: A web-based GIS (web-GIS) database of the scientific articles on earthquake-triggered landslides
Source: Copernicus journal article supplement (doi:10.5194/nhess-23-1789-2023), 2023-05-12
Supplement: Supplementary file 1 [file nhess-23-1789-2023-supplement.zip › nhess-23-1789-2023-supplement-title-page.pdf]

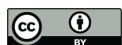

*Supplement of*

## **A web-based GIS (web-GIS) database of the scientific articles on earthquake-triggered landslides**

**Luca Schilirò et al.**

*Correspondence to:* Luca Schilirò ([luca.schiliro@cnr.it](mailto:luca.schiliro@cnr.it))

- [nhess-23-1789-2023-supplement-title-page.pdf](#)
- [article database.xlsx](#)

The copyright of individual parts of the supplement might differ from the article licence.
